# Supplementary material for: Transcription Factor TFAP2C Regulates Major Programs Required for Murine Fetal Germ Cell Maintenance and Haploinsufficiency Predisposes to Teratomas in Male Mice
Source: PubMed Central journal article supplement (PMC3742748; doi:10.1371/journal.pone.0071113), 2013-08-13
Supplement: pone.0071113.s010.pdf [file pone.0071113.s010.pdf]

**Supplemental Data S1:** Gene Ontology analysis for 1.5 fold change in log<sub>2</sub> scale for *Tfap2c*<sup>-/-</sup> (KO) PGCLCs in comparison to ctrl PGCLCs.

## **1 Introduction**

List of samples:

1. #1 / #2 **ESC Ctrl**,
2. #1 / #2 **ESC KO**
3. #1 / #2 **PGC Ctrl**
4. #1 / #2 **PGC KO**
5. **ESC**, arrays: ESC-1, ESC-2, ESC-3 as control

## **2 Differentially expressed genes between PGC KO and PGC CTRL**

### **2.1 Up-regulated in PGC KO in relation to PGC CTRL**

Number of probes fulfilling the condition: 247.

In the following figures, the expression of the 247 probes is distributed into 3 heat maps. Each one with 83 probes. The last one with 81 probes.

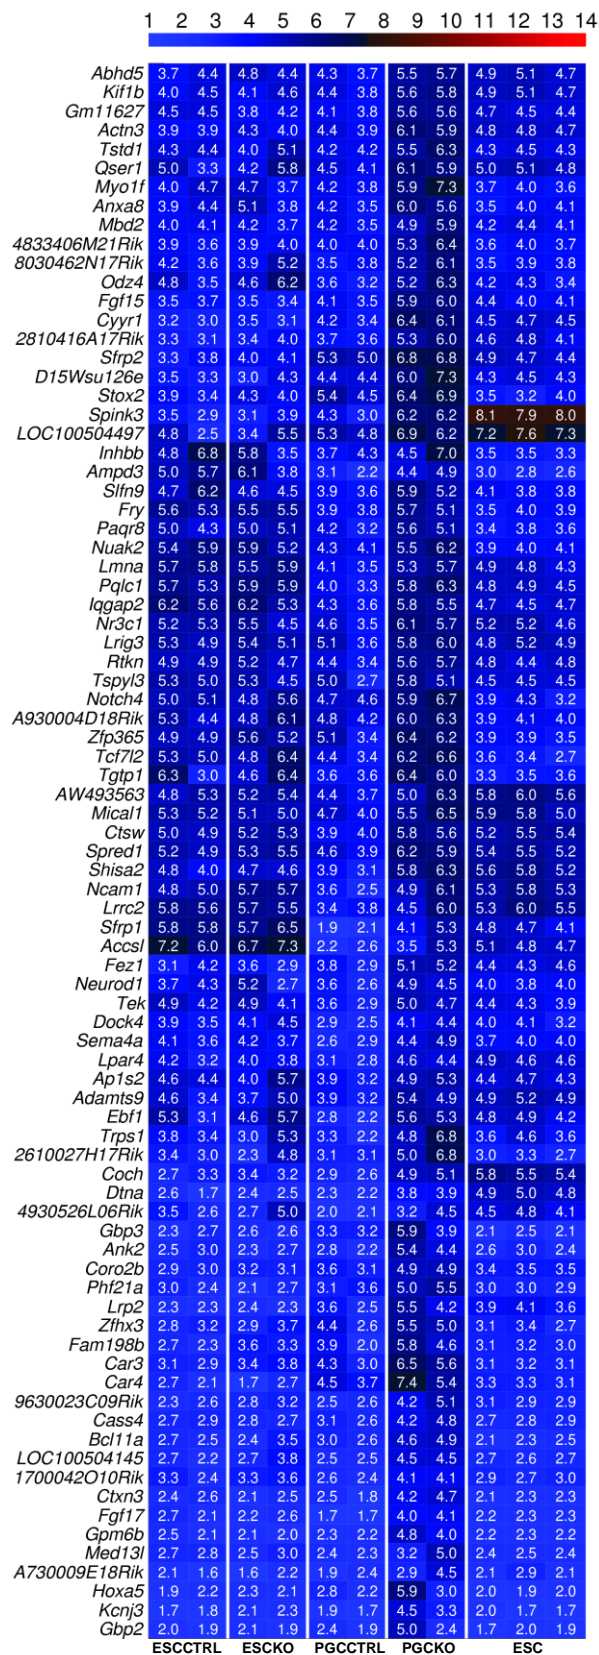

Figure 1: Heat map number 1 (83 probes of 247). PGC KO->PGC CTRL-Log2(2.8284).

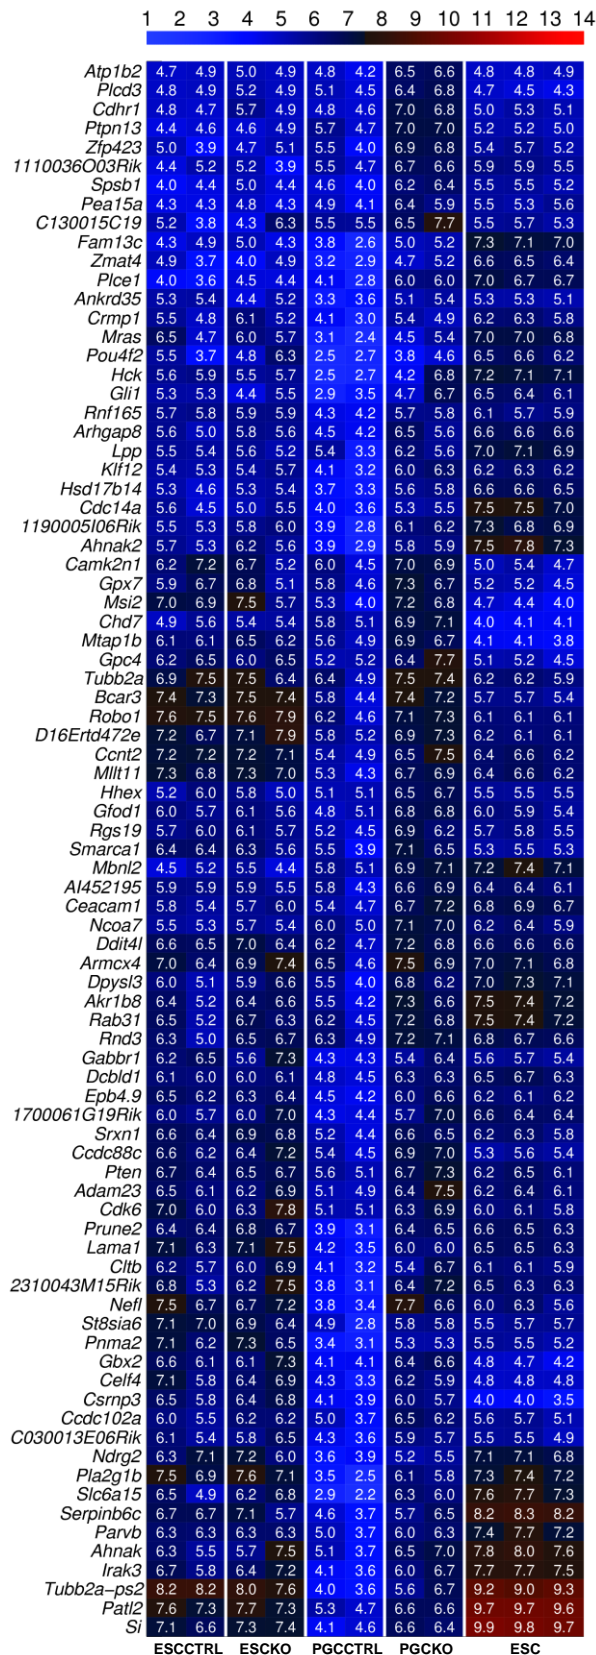

Figure 2: Heat map number 2 (83 probes of 247). PGC KO->PGC CTRL-Log2(2.8284).

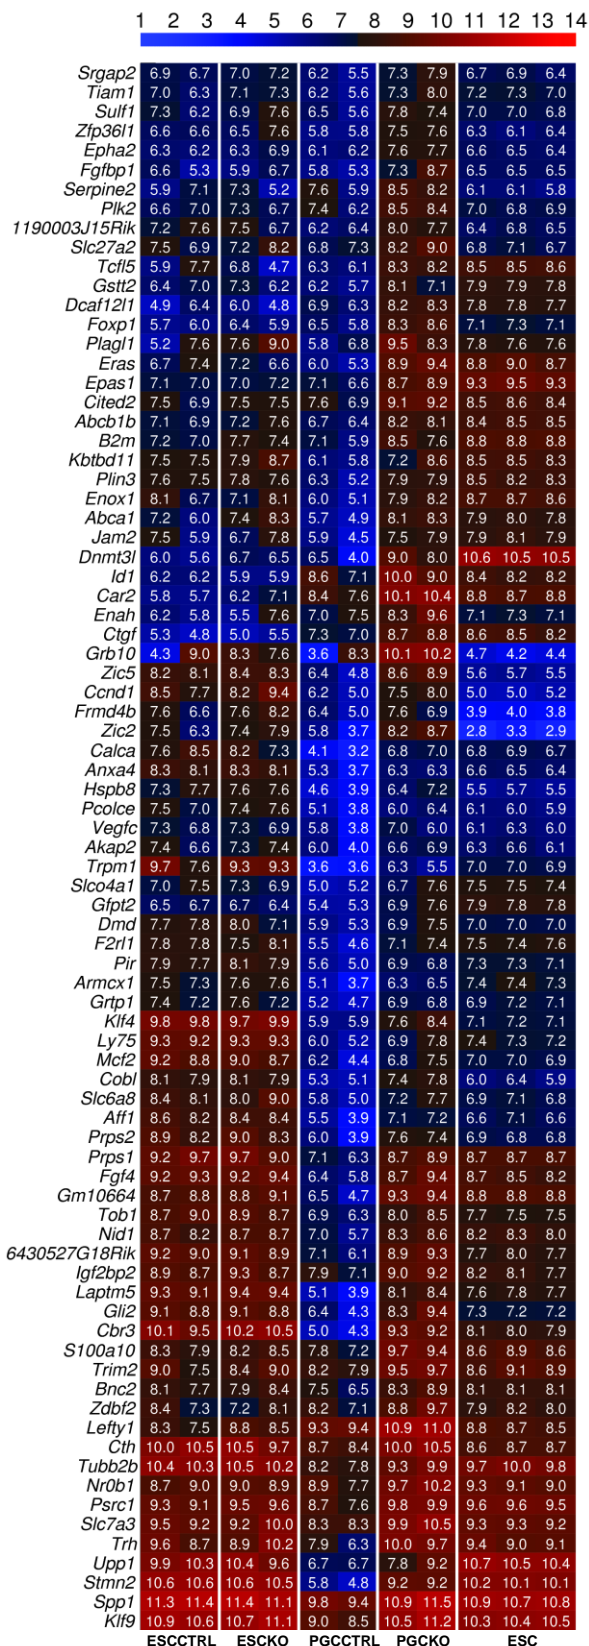

Figure 3: Heat map number 3 (81 probes of 247). PGC KO->-PGC CTRL-Log2(2.8284).

## 2.2 GO enrichment analysis of PGC KO->-PGC CTRL-Log2(2.8284)

Number of probes in the signal set 247

Number of unique probes in the signal set 247

Number of probes in the background set 45101

Number of unique probes in the background set 21390

Table 1: GO terms of PGC KO->-PGC CTRL-Log2(2.8284)-molecular-function

| GO                         | Ter                              |
|----------------------------|----------------------------------|
| <a href="#">GO:0000166</a> | nucleotide binding (3.1%)        |
| <a href="#">GO:0003824</a> | catalytic activity (3.1%)        |
| <a href="#">GO:0017076</a> | purine nucleotide binding (8.4%) |
| <a href="#">GO:0005515</a> | protein binding (9.6%)           |
| <a href="#">GO:0005488</a> | binding (9.8%)                   |
| <a href="#">GO:0043167</a> | ion binding (11%)                |
| Others                     | Others (55%)                     |

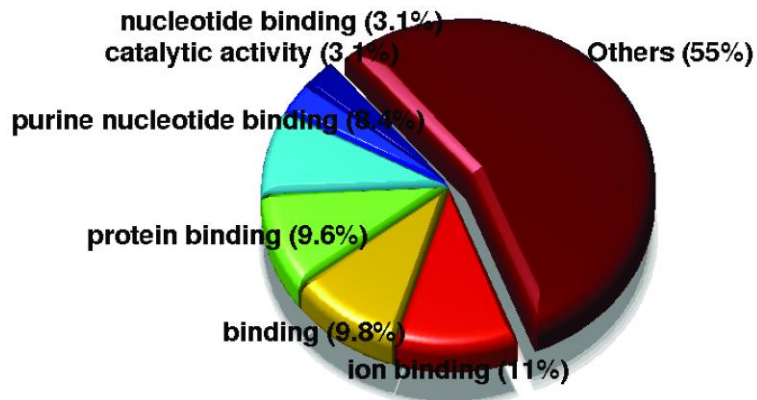

Figure 4: Pie graph of PGC KO->-PGC CTRL-Log2(2.8284)-molecular-function

Table : GO terms of PGC KO->-PGC CTRL-Log2(2.8284)-biological-process

| GO                         | Ter                                                  |
|----------------------------|------------------------------------------------------|
| <a href="#">GO:0050789</a> | regulation of biological process (3.1%)              |
| <a href="#">GO:0023051</a> | regulation of signaling (3.4%)                       |
| <a href="#">GO:0009889</a> | regulation of biosynthetic process (3.4%)            |
| <a href="#">GO:0050793</a> | regulation of developmental process (3.6%)           |
| <a href="#">GO:0016043</a> | cellular component organization (4%)                 |
| <a href="#">GO:0060255</a> | regulation of macromolecule metabolic process (4.1%) |
| <a href="#">GO:0050896</a> | response to stimulus (5.6%)                          |
| <a href="#">GO:0032502</a> | developmental process (9.4%)                         |
| <a href="#">GO:0050794</a> | regulation of cellular process (9.6%)                |
| Others                     | Others (54%)                                         |

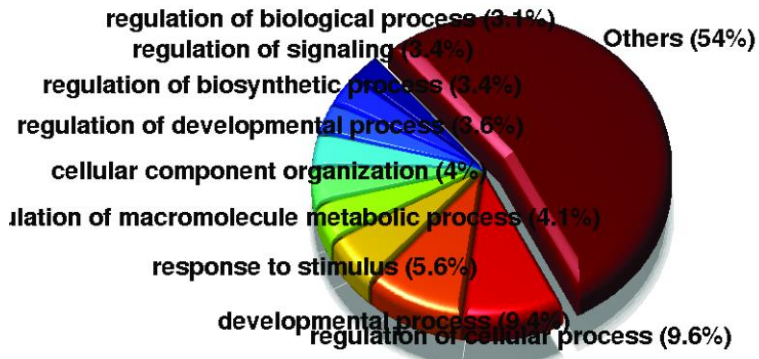

Figure 5: Pie graph of PGC KO->-PGC CTRL-Log2(2.8284)-biological-process

Table : GO terms of PGC KO->-PGC CTRL-Log2(2.8284)-cellular-component

| GO                         | Ter                                                 |
|----------------------------|-----------------------------------------------------|
| <a href="#">GO:0044459</a> | plasma membrane part (3.1%)                         |
| <a href="#">GO:0044422</a> | organelle part (3.2%)                               |
| <a href="#">GO:0043232</a> | intracellular non-membrane-bounded organelle (3.3%) |
| <a href="#">GO:0044425</a> | membrane part (3.4%)                                |
| <a href="#">GO:0042995</a> | cell projection (3.6%)                              |
| <a href="#">GO:0043234</a> | protein complex (4%)                                |
| <a href="#">GO:0043227</a> | membrane-bounded organelle (4.9%)                   |
| <a href="#">GO:0044444</a> | cytoplasmic part (5.5%)                             |
| <a href="#">GO:0043229</a> | intracellular organelle (5.7%)                      |
| <a href="#">GO:0043226</a> | organelle (5.7%)                                    |
| <a href="#">GO:0031224</a> | intrinsic to membrane (5.9%)                        |
| <a href="#">GO:0016020</a> | membrane (6.7%)                                     |
| <a href="#">GO:0043231</a> | intracellular membrane-bounded organelle (11%)      |
| <a href="#">GO:0044424</a> | intracellular part (11%)                            |
| Others                     | Others (23%)                                        |

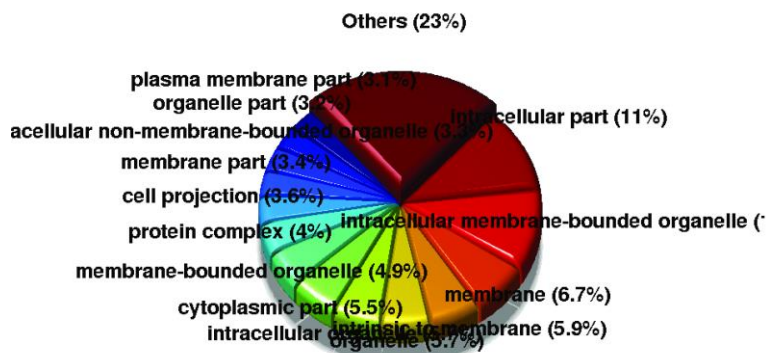

Figure 6: Pie graph of PGC KO->-PGC CTRL-Log2(2.8284)-cellular-component

### Molecular-function-PGC KO->-PGC CTRL-Log2(2.8284)

Table : Significant GO enrichment terms for Molecular-function-PGC KO->-PGC CTRL-Log2(2.8284)

| Count  | p-val      | GO id                      | GO term           | Genes                                                                                                                                                                                                                                            |
|--------|------------|----------------------------|-------------------|--------------------------------------------------------------------------------------------------------------------------------------------------------------------------------------------------------------------------------------------------|
| 11/211 | 0.00037468 | <a href="#">GO:0003682</a> | chromatin binding | <a href="#">Chd7</a> <a href="#">Foxp1</a> <a href="#">Gli1</a> <a href="#">Gli2</a> <a href="#">Hhex</a> <a href="#">Mbd2</a> <a href="#">Nr3c1</a> <a href="#">Phf21a</a> <a href="#">Pou4f2</a> <a href="#">Smarca1</a> <a href="#">Trps1</a> |

|        |            |                            |                                                    |                                                                                                                                                                                                                                                                                                                                                                                                                                                                                                     |
|--------|------------|----------------------------|----------------------------------------------------|-----------------------------------------------------------------------------------------------------------------------------------------------------------------------------------------------------------------------------------------------------------------------------------------------------------------------------------------------------------------------------------------------------------------------------------------------------------------------------------------------------|
| 10/202 | 0.00097897 | <a href="#">GO:0016564</a> | transcription repressor activity                   | <a href="#">Cited2</a> <a href="#">Dnmt3l</a> <a href="#">Foxp1</a> <a href="#">Hhex</a> <a href="#">Id1</a> <a href="#">Klf4</a> <a href="#">Nr0b1</a> <a href="#">Trps1</a> <a href="#">Zfhx3</a> <a href="#">Zfp423</a>                                                                                                                                                                                                                                                                          |
| 14/375 | 0.0020397  | <a href="#">GO:0019001</a> | guanyl nucleotide binding                          | <a href="#">Dock4</a> <a href="#">Eras</a> <a href="#">Gbp2</a> <a href="#">Gbp3</a> <a href="#">Mras</a> <a href="#">Prps1</a> <a href="#">Prps2</a> <a href="#">Rab31</a> <a href="#">Rnd3</a> <a href="#">Rtkn</a> <a href="#">Tgtp1</a> <a href="#">Tubb2a</a> <a href="#">Tubb2a-ps2</a> <a href="#">Tubb2b</a>                                                                                                                                                                                |
| 16/458 | 0.0021479  | <a href="#">GO:0019904</a> | protein domain specific binding                    | <a href="#">Akap2</a> <a href="#">Ccdc88c</a> <a href="#">Cited2</a> <a href="#">Dmd</a> <a href="#">Dock4</a> <a href="#">Dpysl3</a> <a href="#">Ebf1</a> <a href="#">Enah</a> <a href="#">Lrp2</a> <a href="#">Mbd2</a> <a href="#">Mical1</a> <a href="#">Ncam1</a> <a href="#">Nefl</a> <a href="#">Nr0b1</a> <a href="#">Pten</a> <a href="#">Robo1</a>                                                                                                                                        |
| 6/102  | 0.0036182  | <a href="#">GO:0015631</a> | tubulin binding                                    | <a href="#">Ccdc88c</a> <a href="#">Fez1</a> <a href="#">Gli1</a> <a href="#">Kif1b</a> <a href="#">Mtap1b</a> <a href="#">Psrc1</a>                                                                                                                                                                                                                                                                                                                                                                |
| 14/400 | 0.0037731  | <a href="#">GO:0030528</a> | transcription regulator activity                   | <a href="#">Cited2</a> <a href="#">Ebf1</a> <a href="#">Epas1</a> <a href="#">Gbx2</a> <a href="#">Hhex</a> <a href="#">Hoxa5</a> <a href="#">Id1</a> <a href="#">Klf9</a> <a href="#">Neurod1</a> <a href="#">Nr3c1</a> <a href="#">Pou4f2</a> <a href="#">Smarca1</a> <a href="#">Tcf15</a> <a href="#">Zfhx3</a>                                                                                                                                                                                 |
| 8/171  | 0.0041485  | <a href="#">GO:0003924</a> | GTPase activity                                    | <a href="#">Eras</a> <a href="#">Gbp2</a> <a href="#">Gbp3</a> <a href="#">Mras</a> <a href="#">Tgtp1</a> <a href="#">Tubb2a</a> <a href="#">Tubb2a-ps2</a> <a href="#">Tubb2b</a>                                                                                                                                                                                                                                                                                                                  |
| 7/138  | 0.0044018  | <a href="#">GO:0008083</a> | growth factor activity                             | <a href="#">Ctgf</a> <a href="#">Fgf15</a> <a href="#">Fgf17</a> <a href="#">Fgf4</a> <a href="#">Inhbb</a> <a href="#">Lefty1</a> <a href="#">Vegfc</a>                                                                                                                                                                                                                                                                                                                                            |
| 5/77   | 0.00484    | <a href="#">GO:0008017</a> | microtubule binding                                | <a href="#">Ccdc88c</a> <a href="#">Gli1</a> <a href="#">Kif1b</a> <a href="#">Mtap1b</a> <a href="#">Psrc1</a>                                                                                                                                                                                                                                                                                                                                                                                     |
| 22/774 | 0.0055559  | <a href="#">GO:0001071</a> | nucleic acid binding transcription factor activity | <a href="#">Aff1</a> <a href="#">Cited2</a> <a href="#">Csrnp3</a> <a href="#">Ebf1</a> <a href="#">Epas1</a> <a href="#">Foxp1</a> <a href="#">Gbx2</a> <a href="#">Gli1</a> <a href="#">Gli2</a> <a href="#">Hhex</a> <a href="#">Hoxa5</a> <a href="#">Id1</a> <a href="#">Klf12</a> <a href="#">Klf4</a> <a href="#">Neurod1</a> <a href="#">Nr0b1</a> <a href="#">Nr3c1</a> <a href="#">Pou4f2</a> <a href="#">Tcf712</a> <a href="#">Trps1</a> <a href="#">Zfhx3</a> <a href="#">Zfp423</a>   |
| 5/85   | 0.0075837  | <a href="#">GO:0070851</a> | growth factor receptor binding                     | <a href="#">Fgf15</a> <a href="#">Fgf17</a> <a href="#">Fgf4</a> <a href="#">Pten</a> <a href="#">Vegfc</a>                                                                                                                                                                                                                                                                                                                                                                                         |
| 12/360 | 0.010293   | <a href="#">GO:0005525</a> | GTP binding                                        | <a href="#">Dock4</a> <a href="#">Eras</a> <a href="#">Gbp2</a> <a href="#">Gbp3</a> <a href="#">Mras</a> <a href="#">Rab31</a> <a href="#">Rnd3</a> <a href="#">Rtkn</a> <a href="#">Tgtp1</a> <a href="#">Tubb2a</a> <a href="#">Tubb2a-ps2</a> <a href="#">Tubb2b</a>                                                                                                                                                                                                                            |
| 16/569 | 0.017403   | <a href="#">GO:0043565</a> | sequence-specific DNA binding                      | <a href="#">Epas1</a> <a href="#">Foxp1</a> <a href="#">Gbx2</a> <a href="#">Gli2</a> <a href="#">Hhex</a> <a href="#">Hoxa5</a> <a href="#">Klf4</a> <a href="#">Mbd2</a> <a href="#">Neurod1</a> <a href="#">Nr0b1</a> <a href="#">Nr3c1</a> <a href="#">Pou4f2</a> <a href="#">Tcf712</a> <a href="#">Trps1</a> <a href="#">Zfhx3</a> <a href="#">Zfp423</a>                                                                                                                                     |
| 5/106  | 0.019251   | <a href="#">GO:0017124</a> | SH3 domain binding                                 | <a href="#">Dock4</a> <a href="#">Dpysl3</a> <a href="#">Enah</a> <a href="#">Lrp2</a> <a href="#">Mical1</a>                                                                                                                                                                                                                                                                                                                                                                                       |
| 22/878 | 0.022505   | <a href="#">GO:0005102</a> | receptor binding                                   | <a href="#">Abca1</a> <a href="#">Calca</a> <a href="#">Ctgf</a> <a href="#">Dmd</a> <a href="#">Fgf15</a> <a href="#">Fgf17</a> <a href="#">Fgf4</a> <a href="#">Grb10</a> <a href="#">Inhbb</a> <a href="#">Lama1</a> <a href="#">Lefty1</a> <a href="#">Nr0b1</a> <a href="#">Nr3c1</a> <a href="#">Pla2g1b</a> <a href="#">Pten</a> <a href="#">Serpine2</a> <a href="#">Spp1</a> <a href="#">Spred1</a> <a href="#">Tcf712</a> <a href="#">Tiam1</a> <a href="#">Trh</a> <a href="#">Vegfc</a> |
| 14/501 | 0.026259   | <a href="#">GO:0008092</a> | cytoskeletal protein binding                       | <a href="#">Actn3</a> <a href="#">Ccdc88c</a> <a href="#">Coro2b</a> <a href="#">Dmd</a> <a href="#">Enah</a> <a href="#">Epb4.9</a> <a href="#">Fez1</a> <a href="#">Gli1</a> <a href="#">Kif1b</a> <a href="#">Mtap1b</a> <a href="#">Myo1f</a> <a href="#">Parvb</a> <a href="#">Psrc1</a> <a href="#">Trim2</a>                                                                                                                                                                                 |
| 11/367 | 0.028403   | <a href="#">GO:0030695</a> | GTPase regulator activity                          | <a href="#">Arhgap8</a> <a href="#">Bcar3</a> <a href="#">Dock4</a> <a href="#">Grtp1</a> <a href="#">Iqgap2</a> <a href="#">Mcf2</a> <a href="#">Plce1</a> <a href="#">Rgs19</a> <a href="#">Rtkn</a> <a href="#">Srgap2</a> <a href="#">Tiam1</a>                                                                                                                                                                                                                                                 |
| 4/82   | 0.030322   | <a href="#">GO:0003729</a> | mRNA binding                                       | <a href="#">Celf4</a> <a href="#">Igf2bp2</a> <a href="#">Mbd2</a> <a href="#">Zfp3611</a>                                                                                                                                                                                                                                                                                                                                                                                                          |
| 4/82   | 0.030631   | <a href="#">GO:0016298</a> | lipase activity                                    | <a href="#">Abhd5</a> <a href="#">Pla2g1b</a> <a href="#">Plcd3</a> <a href="#">Plce1</a>                                                                                                                                                                                                                                                                                                                                                                                                           |
| 19/766 | 0.036637   | <a href="#">GO:0030234</a> | enzyme regulator activity                          | <a href="#">Arhgap8</a> <a href="#">Bcar3</a> <a href="#">Camk2n1</a> <a href="#">Ccnd1</a> <a href="#">Dnmt3l</a> <a href="#">Dock4</a> <a href="#">Grtp1</a> <a href="#">Iqgap2</a> <a href="#">Klf4</a> <a href="#">Mcf2</a> <a href="#">Plce1</a> <a href="#">Rgs19</a> <a href="#">Rtkn</a> <a href="#">Serpine2</a> <a href="#">Sfrp2</a> <a href="#">Spink3</a> <a href="#">Srgap2</a> <a href="#">Tiam1</a>                                                                                 |
| 16/633 | 0.044822   | <a href="#">GO:0019899</a> | enzyme binding                                     | <a href="#">Abca1</a> <a href="#">Camk2n1</a> <a href="#">Ccnd1</a> <a href="#">Ceacam1</a> <a href="#">Dmd</a> <a href="#">Dnmt3l</a> <a href="#">Dock4</a> <a href="#">Epas1</a> <a href="#">Fez1</a> <a href="#">Ncam1</a> <a href="#">Nefl</a> <a href="#">Pea15a</a> <a href="#">Plce1</a> <a href="#">Rtkn</a> <a href="#">Tcf712</a> <a href="#">Zfhx3</a>                                                                                                                                   |

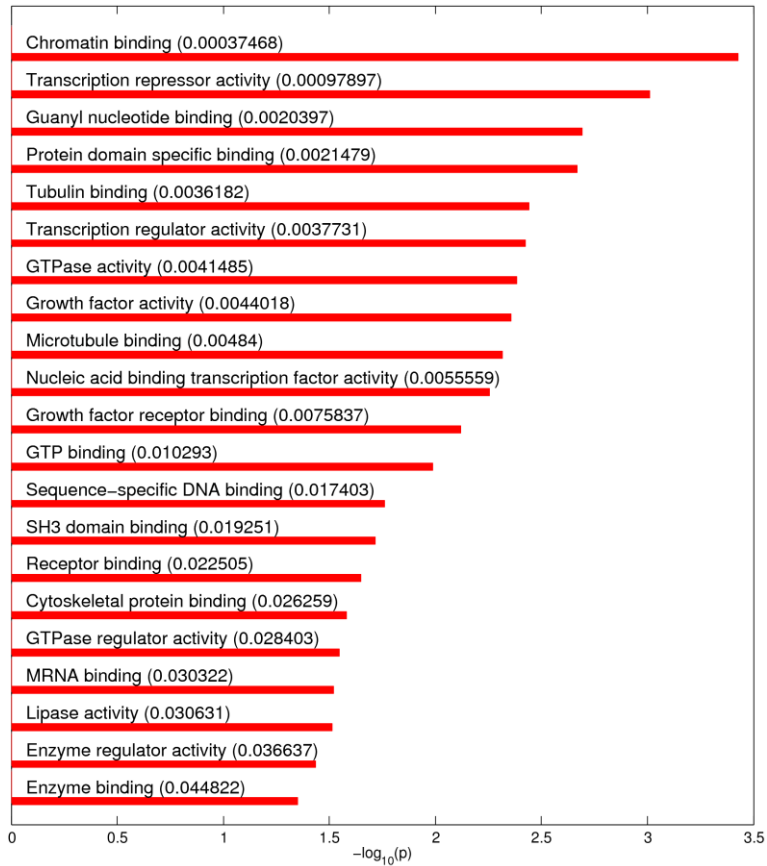

Figure 7: Plot bar of the  $-\log_{10}(p)$  of the significant enriched terms of Molecular-function-PGC KO->-PGC CTRL-Log2(2.8284). The longer the bar, the higher is the statistical significance of the enrichment (in parenthesis are written the p-values)



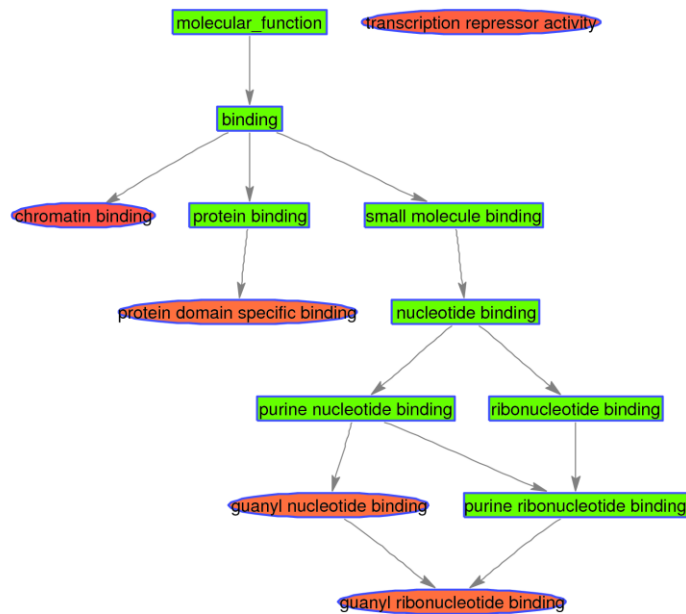

Figure 8: Direct acyclic graph (DAG) associated to the 5 top higher significant enriched gene ontology terms. The higher the significance of the term the more red is the box framing the term. The significant enriched terms are encircled by ellipses.

### Biological-process-PGC KO->-PGC CTRL-Log2(2.8284)

Table : Significant GO enrichment terms for Biological-process-PGC KO->-PGC CTRL-Log2(2.8284)

| Count Ratio | p-val          | GO id                          | GO term                             | Genes                                                                                                                                                                                                                                                                                                                                                                                                                                                                                                                                                                                                                                                                                                                                                                                                                                                                                                                                                                    |
|-------------|----------------|--------------------------------|-------------------------------------|--------------------------------------------------------------------------------------------------------------------------------------------------------------------------------------------------------------------------------------------------------------------------------------------------------------------------------------------------------------------------------------------------------------------------------------------------------------------------------------------------------------------------------------------------------------------------------------------------------------------------------------------------------------------------------------------------------------------------------------------------------------------------------------------------------------------------------------------------------------------------------------------------------------------------------------------------------------------------|
| 37/923<br>5 | 7.1306e-05     | <a href="#">GO:005079</a><br>3 | regulation of developmental process | <a href="#">Adamts9</a> <a href="#">Akap2</a> <a href="#">Car2</a> <a href="#">Ccnd1</a> <a href="#">Cdk6</a> <a href="#">Dpysl3</a> <a href="#">Epha2</a> <a href="#">Fez1</a> <a href="#">Fgf4</a> <a href="#">Gli2</a> <a href="#">Hhex</a> <a href="#">Hoxa5</a> <a href="#">Id1</a> <a href="#">Irak3</a> <a href="#">Klf4</a> <a href="#">Lama1</a> <a href="#">Lmna</a> <a href="#">Mtap1b</a> <a href="#">Ncam1</a> <a href="#">Nefl</a> <a href="#">Neurod1</a> <a href="#">Notch4</a> <a href="#">Nr0b1</a> <a href="#">Pou4f2</a> <a href="#">Pten</a> <a href="#">Robo1</a> <a href="#">Serpine2</a> <a href="#">Sfrp1</a> <a href="#">Sfrp2</a> <a href="#">Spp1</a> <a href="#">Tcf7l2</a> <a href="#">Tcf15</a> <a href="#">Tek</a> <a href="#">Tiam1</a> <a href="#">Tob1</a> <a href="#">Vegfc</a> <a href="#">Zfhx3</a>                                                                                                                                |
| 5/30<br>1   | 0.0001722      | <a href="#">GO:002191</a><br>5 | neural tube development             | <a href="#">Epha2</a> <a href="#">Gli2</a> <a href="#">Sfrp1</a> <a href="#">Sfrp2</a> <a href="#">Tcf7l2</a>                                                                                                                                                                                                                                                                                                                                                                                                                                                                                                                                                                                                                                                                                                                                                                                                                                                            |
| 28/659      | 0.0001846      | <a href="#">GO:004559</a><br>5 | regulation of cell differentiation  | <a href="#">Adamts9</a> <a href="#">Car2</a> <a href="#">Ccnd1</a> <a href="#">Cdk6</a> <a href="#">Dpysl3</a> <a href="#">Fez1</a> <a href="#">Fgf4</a> <a href="#">Gli2</a> <a href="#">Hoxa5</a> <a href="#">Klf4</a> <a href="#">Mtap1b</a> <a href="#">Nefl</a> <a href="#">Neurod1</a> <a href="#">Notch4</a> <a href="#">Nr0b1</a> <a href="#">Pou4f2</a> <a href="#">Pten</a> <a href="#">Robo1</a> <a href="#">Serpine2</a> <a href="#">Sfrp1</a> <a href="#">Sfrp2</a> <a href="#">Spp1</a> <a href="#">Tcf7l2</a> <a href="#">Tcf15</a> <a href="#">Tiam1</a> <a href="#">Tob1</a> <a href="#">Vegfc</a> <a href="#">Zfhx3</a>                                                                                                                                                                                                                                                                                                                                |
| 9/110       | 0.0002545      | <a href="#">GO:003327</a><br>3 | response to vitamin                 | <a href="#">Abca1</a> <a href="#">Abcb1b</a> <a href="#">Ccnd1</a> <a href="#">Klf4</a> <a href="#">Lefty1</a> <a href="#">Lrp2</a> <a href="#">Mtap1b</a> <a href="#">Spp1</a> <a href="#">Tek</a>                                                                                                                                                                                                                                                                                                                                                                                                                                                                                                                                                                                                                                                                                                                                                                      |
| 6/49<br>1   | 0.0002579      | <a href="#">GO:000184</a><br>3 | neural tube closure                 | <a href="#">Cobl</a> <a href="#">Enah</a> <a href="#">Sfrp1</a> <a href="#">Sfrp2</a> <a href="#">Zic2</a> <a href="#">Zic5</a>                                                                                                                                                                                                                                                                                                                                                                                                                                                                                                                                                                                                                                                                                                                                                                                                                                          |
| 5/33        | 0.0002774      | <a href="#">GO:006056</a><br>2 | epithelial tube morphogenesis       | <a href="#">Gli2</a> <a href="#">Hhex</a> <a href="#">Hoxa5</a> <a href="#">Lama1</a> <a href="#">Nr3c1</a>                                                                                                                                                                                                                                                                                                                                                                                                                                                                                                                                                                                                                                                                                                                                                                                                                                                              |
| 32/817<br>6 | 0.0003044      | <a href="#">GO:004851</a><br>3 | organ development                   | <a href="#">Anxa4</a> <a href="#">Car2</a> <a href="#">Car4</a> <a href="#">Ccnd1</a> <a href="#">Cdk6</a> <a href="#">Chd7</a> <a href="#">Cited2</a> <a href="#">Ctcf</a> <a href="#">Dmd</a> <a href="#">Epas1</a> <a href="#">Fgf15</a> <a href="#">Foxp1</a> <a href="#">Gli1</a> <a href="#">Gli2</a> <a href="#">Hhex</a> <a href="#">Hoxa5</a> <a href="#">Id1</a> <a href="#">Inhbb</a> <a href="#">Klf4</a> <a href="#">Lmna</a> <a href="#">Neurod1</a> <a href="#">Notch4</a> <a href="#">Nr0b1</a> <a href="#">Nr3c1</a> <a href="#">Plcd3</a> <a href="#">Pten</a> <a href="#">Sfrp1</a> <a href="#">Sfrp2</a> <a href="#">Smarca1</a> <a href="#">Tek</a> <a href="#">Trps1</a> <a href="#">Zfhx3</a>                                                                                                                                                                                                                                                     |
| 42/119<br>6 | 0.0004335<br>1 | <a href="#">GO:003015</a><br>4 | cell differentiation                | <a href="#">Abhd5</a> <a href="#">Bcl11a</a> <a href="#">Ccnd1</a> <a href="#">Cdk6</a> <a href="#">Chd7</a> <a href="#">Cited2</a> <a href="#">Ctcf</a> <a href="#">Enah</a> <a href="#">Epas1</a> <a href="#">Epha2</a> <a href="#">Fgf4</a> <a href="#">Foxp1</a> <a href="#">Gabbr1</a> <a href="#">Gli1</a> <a href="#">Gli2</a> <a href="#">Hhex</a> <a href="#">Hoxa5</a> <a href="#">Inhbb</a> <a href="#">Klf4</a> <a href="#">Lama1</a> <a href="#">Ndrq2</a> <a href="#">Neurod1</a> <a href="#">Notch4</a> <a href="#">Nr0b1</a> <a href="#">Pagr8</a> <a href="#">Pou4f2</a> <a href="#">Robo1</a> <a href="#">Sema4a</a> <a href="#">Serpine2</a> <a href="#">Sfrp1</a> <a href="#">Sfrp2</a> <a href="#">Smarca1</a> <a href="#">Spp1</a> <a href="#">Tcf7l2</a> <a href="#">Tubb2a</a> <a href="#">Tubb2a-ps2</a> <a href="#">Tubb2b</a> <a href="#">Vegfc</a> <a href="#">Zfp361l1</a> <a href="#">Zfp423</a> <a href="#">Zic2</a> <a href="#">Zic5</a> |
| 6/54<br>2   | 0.0004470      | <a href="#">GO:000741</a><br>7 | central nervous system development  | <a href="#">Chd7</a> <a href="#">Cited2</a> <a href="#">Mtap1b</a> <a href="#">Pten</a> <a href="#">Robo1</a> <a href="#">Zic2</a>                                                                                                                                                                                                                                                                                                                                                                                                                                                                                                                                                                                                                                                                                                                                                                                                                                       |

|        |           |                           |                                                     |                                                                                                                                                                                                                                                                                                                                                                                                                                                                                                                                                                                                                                                                                                                                                                                                                                                                                                                                                                                                                                                                                                                                                                                                                                                                                               |
|--------|-----------|---------------------------|-----------------------------------------------------|-----------------------------------------------------------------------------------------------------------------------------------------------------------------------------------------------------------------------------------------------------------------------------------------------------------------------------------------------------------------------------------------------------------------------------------------------------------------------------------------------------------------------------------------------------------------------------------------------------------------------------------------------------------------------------------------------------------------------------------------------------------------------------------------------------------------------------------------------------------------------------------------------------------------------------------------------------------------------------------------------------------------------------------------------------------------------------------------------------------------------------------------------------------------------------------------------------------------------------------------------------------------------------------------------|
| 12/196 | 0.0004763 | <a href="#">GO:000200</a> | morphogenesis of an epithelium                      | <a href="#">Car2</a> <a href="#">Cited2</a> <a href="#">Gbx2</a> <a href="#">Gli2</a> <a href="#">Hhex</a> <a href="#">Hoxa5</a> <a href="#">Lama1</a> <a href="#">Notch4</a> <a href="#">Nr3c1</a> <a href="#">Sfrp1</a> <a href="#">Sfrp2</a> <a href="#">Vegfc</a>                                                                                                                                                                                                                                                                                                                                                                                                                                                                                                                                                                                                                                                                                                                                                                                                                                                                                                                                                                                                                         |
| 4/23   | 0.0006005 | <a href="#">GO:001016</a> | response to X-ray                                   | <a href="#">Ccnd1</a> <a href="#">Lrp2</a> <a href="#">Sfrp1</a> <a href="#">Sfrp2</a>                                                                                                                                                                                                                                                                                                                                                                                                                                                                                                                                                                                                                                                                                                                                                                                                                                                                                                                                                                                                                                                                                                                                                                                                        |
| 57/179 | 0.0006796 | <a href="#">GO:004885</a> | anatomical structure development                    | <a href="#">Abcb1b</a> <a href="#">Anxa4</a> <a href="#">Car2</a> <a href="#">Car4</a> <a href="#">Ccnd1</a> <a href="#">Cdk6</a> <a href="#">Chd7</a> <a href="#">Cited2</a> <a href="#">Ctgf</a> <a href="#">Dmd</a> <a href="#">Dnmt3l</a> <a href="#">Dpysl3</a> <a href="#">Enah</a> <a href="#">Epas1</a> <a href="#">Epha2</a> <a href="#">Fgf15</a> <a href="#">Foxp1</a> <a href="#">Gbx2</a> <a href="#">Gli1</a> <a href="#">Gli2</a> <a href="#">Hhex</a> <a href="#">Hoxa5</a> <a href="#">Id1</a> <a href="#">Inhbb</a> <a href="#">Kif1b</a> <a href="#">Klf4</a> <a href="#">Lama1</a> <a href="#">Lmna</a> <a href="#">Lrp2</a> <a href="#">Mcf2</a> <a href="#">Msi2</a> <a href="#">Mtap1b</a> <a href="#">Ncam1</a> <a href="#">Ndrq2</a> <a href="#">Neurod1</a> <a href="#">Notch4</a> <a href="#">Nr0b1</a> <a href="#">Nr3c1</a> <a href="#">Plcd3</a> <a href="#">Plce1</a> <a href="#">Pou4f2</a> <a href="#">Prps1</a> <a href="#">Pten</a> <a href="#">Robo1</a> <a href="#">Sema4a</a> <a href="#">Serpine2</a> <a href="#">Sfrp1</a> <a href="#">Sfrp2</a> <a href="#">Smarca1</a> <a href="#">Spp1</a> <a href="#">Tcf7l2</a> <a href="#">Tek</a> <a href="#">Trps1</a> <a href="#">Zfhx3</a> <a href="#">Zfp423</a> <a href="#">Zic2</a> <a href="#">Zic5</a> |
| 4/24   | 0.0007146 | <a href="#">GO:005138</a> | response to mineralocorticoid stimulus              | <a href="#">Ccnd1</a> <a href="#">Ctgf</a> <a href="#">Nefl</a> <a href="#">Trh</a>                                                                                                                                                                                                                                                                                                                                                                                                                                                                                                                                                                                                                                                                                                                                                                                                                                                                                                                                                                                                                                                                                                                                                                                                           |
| 51/158 | 0.0008766 | <a href="#">GO:004886</a> | cellular developmental process                      | <a href="#">Abcb1b</a> <a href="#">Abhd5</a> <a href="#">Bcl11a</a> <a href="#">Calca</a> <a href="#">Ccnd1</a> <a href="#">Cdk6</a> <a href="#">Chd7</a> <a href="#">Cited2</a> <a href="#">Ctgf</a> <a href="#">Dmd</a> <a href="#">Enah</a> <a href="#">Epas1</a> <a href="#">Epha2</a> <a href="#">Fgf4</a> <a href="#">Foxp1</a> <a href="#">Gabbr1</a> <a href="#">Gli1</a> <a href="#">Gli2</a> <a href="#">Hhex</a> <a href="#">Hoxa5</a> <a href="#">Id1</a> <a href="#">Inhbb</a> <a href="#">Klf4</a> <a href="#">Lama1</a> <a href="#">Lmna</a> <a href="#">Msi2</a> <a href="#">Mtap1b</a> <a href="#">Ncam1</a> <a href="#">Ndrq2</a> <a href="#">Nefl</a> <a href="#">Neurod1</a> <a href="#">Notch4</a> <a href="#">Nr0b1</a> <a href="#">Pagr8</a> <a href="#">Pou4f2</a> <a href="#">Robo1</a> <a href="#">Sema4a</a> <a href="#">Serpine2</a> <a href="#">Sfrp1</a> <a href="#">Sfrp2</a> <a href="#">Smarca1</a> <a href="#">Spp1</a> <a href="#">Tcf7l2</a> <a href="#">Tubb2a</a> <a href="#">Tubb2a-ps2</a> <a href="#">Tubb2b</a> <a href="#">Vegfc</a> <a href="#">Zfp36l1</a> <a href="#">Zfp423</a> <a href="#">Zic2</a> <a href="#">Zic5</a>                                                                                                                      |
| 34/955 | 0.0011004 | <a href="#">GO:000996</a> | regulation of signal transduction                   | <a href="#">Ccnd1</a> <a href="#">Ceacam1</a> <a href="#">Cited2</a> <a href="#">Ddit4l</a> <a href="#">Fgf15</a> <a href="#">Fgf4</a> <a href="#">Fgfbp1</a> <a href="#">Gli2</a> <a href="#">Grb10</a> <a href="#">Hhex</a> <a href="#">Id1</a> <a href="#">Iqgap2</a> <a href="#">Irak3</a> <a href="#">Klf4</a> <a href="#">Mbd2</a> <a href="#">Mcf2</a> <a href="#">Ncam1</a> <a href="#">Nr0b1</a> <a href="#">Nr3c1</a> <a href="#">Plce1</a> <a href="#">Plk2</a> <a href="#">Pten</a> <a href="#">Rgs19</a> <a href="#">Robo1</a> <a href="#">Serpine2</a> <a href="#">Sfrp1</a> <a href="#">Sfrp2</a> <a href="#">Slc7a3</a> <a href="#">Spred1</a> <a href="#">Tcf7l2</a> <a href="#">Tek</a> <a href="#">Tiam1</a> <a href="#">Tob1</a> <a href="#">Vegfc</a>                                                                                                                                                                                                                                                                                                                                                                                                                                                                                                                    |
| 8/109  | 0.0011069 | <a href="#">GO:004873</a> | gland development                                   | <a href="#">Cited2</a> <a href="#">Gli1</a> <a href="#">Gli2</a> <a href="#">Hhex</a> <a href="#">Hoxa5</a> <a href="#">Notch4</a> <a href="#">Nr0b1</a> <a href="#">Nr3c1</a>                                                                                                                                                                                                                                                                                                                                                                                                                                                                                                                                                                                                                                                                                                                                                                                                                                                                                                                                                                                                                                                                                                                |
| 15/310 | 0.0013376 | <a href="#">GO:000996</a> | negative regulation of signal transduction          | <a href="#">Ccnd1</a> <a href="#">Ddit4l</a> <a href="#">Grb10</a> <a href="#">Hhex</a> <a href="#">Irak3</a> <a href="#">Klf4</a> <a href="#">Nr0b1</a> <a href="#">Nr3c1</a> <a href="#">Pten</a> <a href="#">Rgs19</a> <a href="#">Robo1</a> <a href="#">Serpine2</a> <a href="#">Sfrp1</a> <a href="#">Sfrp2</a> <a href="#">Tob1</a>                                                                                                                                                                                                                                                                                                                                                                                                                                                                                                                                                                                                                                                                                                                                                                                                                                                                                                                                                     |
| 14/280 | 0.0013692 | <a href="#">GO:004559</a> | negative regulation of cell differentiation         | <a href="#">Ccnd1</a> <a href="#">Cdk6</a> <a href="#">Fgf4</a> <a href="#">Gli2</a> <a href="#">Hoxa5</a> <a href="#">Klf4</a> <a href="#">Notch4</a> <a href="#">Nr0b1</a> <a href="#">Sfrp1</a> <a href="#">Sfrp2</a> <a href="#">Spp1</a> <a href="#">Tcf7l2</a> <a href="#">Tob1</a> <a href="#">Zfhx3</a>                                                                                                                                                                                                                                                                                                                                                                                                                                                                                                                                                                                                                                                                                                                                                                                                                                                                                                                                                                               |
| 20/474 | 0.0014477 | <a href="#">GO:004873</a> | system development                                  | <a href="#">Chd7</a> <a href="#">Cited2</a> <a href="#">Dpysl3</a> <a href="#">Enah</a> <a href="#">Epha2</a> <a href="#">Gbx2</a> <a href="#">Gli2</a> <a href="#">Hoxa5</a> <a href="#">Id1</a> <a href="#">Mtap1b</a> <a href="#">Ndrq2</a> <a href="#">Neurod1</a> <a href="#">Pou4f2</a> <a href="#">Prps1</a> <a href="#">Pten</a> <a href="#">Robo1</a> <a href="#">Sema4a</a> <a href="#">Serpine2</a> <a href="#">Zfp423</a> <a href="#">Zic2</a>                                                                                                                                                                                                                                                                                                                                                                                                                                                                                                                                                                                                                                                                                                                                                                                                                                    |
| 10/168 | 0.0016146 | <a href="#">GO:003015</a> | regulation of cell adhesion                         | <a href="#">Calca</a> <a href="#">Cdk6</a> <a href="#">Cited2</a> <a href="#">Lama1</a> <a href="#">Myo1f</a> <a href="#">Nid1</a> <a href="#">Pten</a> <a href="#">Serpine2</a> <a href="#">Spp1</a> <a href="#">Tek</a>                                                                                                                                                                                                                                                                                                                                                                                                                                                                                                                                                                                                                                                                                                                                                                                                                                                                                                                                                                                                                                                                     |
| 6/69   | 0.0017155 | <a href="#">GO:003318</a> | response to vitamin A                               | <a href="#">Abca1</a> <a href="#">Klf4</a> <a href="#">Lefty1</a> <a href="#">Lrp2</a> <a href="#">Mtap1b</a> <a href="#">Tek</a>                                                                                                                                                                                                                                                                                                                                                                                                                                                                                                                                                                                                                                                                                                                                                                                                                                                                                                                                                                                                                                                                                                                                                             |
| 39/117 | 0.001751  | <a href="#">GO:002305</a> | regulation of signaling                             | <a href="#">Ccnd1</a> <a href="#">Ceacam1</a> <a href="#">Chd7</a> <a href="#">Cited2</a> <a href="#">Ddit4l</a> <a href="#">Fgf15</a> <a href="#">Fgf4</a> <a href="#">Fgfbp1</a> <a href="#">Gabbr1</a> <a href="#">Gli2</a> <a href="#">Grb10</a> <a href="#">Hhex</a> <a href="#">Id1</a> <a href="#">Inhbb</a> <a href="#">Iqgap2</a> <a href="#">Irak3</a> <a href="#">Klf4</a> <a href="#">Mbd2</a> <a href="#">Mcf2</a> <a href="#">Mtap1b</a> <a href="#">Ncam1</a> <a href="#">Nr0b1</a> <a href="#">Nr3c1</a> <a href="#">Plce1</a> <a href="#">Plk2</a> <a href="#">Pten</a> <a href="#">Rgs19</a> <a href="#">Robo1</a> <a href="#">Serpine2</a> <a href="#">Sfrp1</a> <a href="#">Sfrp2</a> <a href="#">Slc7a3</a> <a href="#">Spred1</a> <a href="#">Tcf7l2</a> <a href="#">Tek</a> <a href="#">Tiam1</a> <a href="#">Tob1</a> <a href="#">Trh</a> <a href="#">Vegfc</a>                                                                                                                                                                                                                                                                                                                                                                                                       |
| 7/93   | 0.0018497 | <a href="#">GO:003134</a> | positive regulation of cell projection organization | <a href="#">Dpysl3</a> <a href="#">Fez1</a> <a href="#">Mtap1b</a> <a href="#">Nefl</a> <a href="#">Robo1</a> <a href="#">Serpine2</a> <a href="#">Tiam1</a>                                                                                                                                                                                                                                                                                                                                                                                                                                                                                                                                                                                                                                                                                                                                                                                                                                                                                                                                                                                                                                                                                                                                  |
| 9/144  | 0.0018771 | <a href="#">GO:001097</a> | regulation of neuron projection development         | <a href="#">Dpysl3</a> <a href="#">Fez1</a> <a href="#">Mtap1b</a> <a href="#">Nefl</a> <a href="#">Pten</a> <a href="#">Robo1</a> <a href="#">Serpine2</a> <a href="#">Spp1</a> <a href="#">Tiam1</a>                                                                                                                                                                                                                                                                                                                                                                                                                                                                                                                                                                                                                                                                                                                                                                                                                                                                                                                                                                                                                                                                                        |
| 4/31   | 0.0019997 | <a href="#">GO:005189</a> | regulation of protein kinase B signaling cascade    | <a href="#">Klf4</a> <a href="#">Pten</a> <a href="#">Tcf7l2</a> <a href="#">Tek</a>                                                                                                                                                                                                                                                                                                                                                                                                                                                                                                                                                                                                                                                                                                                                                                                                                                                                                                                                                                                                                                                                                                                                                                                                          |
| 15/325 | 0.002167  | <a href="#">GO:004559</a> | positive regulation of cell differentiation         | <a href="#">Adamts9</a> <a href="#">Car2</a> <a href="#">Fez1</a> <a href="#">Gli2</a> <a href="#">Hoxa5</a> <a href="#">Mtap1b</a> <a href="#">Nefl</a> <a href="#">Neurod1</a> <a href="#">Pou4f2</a> <a href="#">Robo1</a> <a href="#">Sfrp1</a> <a href="#">Sfrp2</a> <a href="#">Tiam1</a> <a href="#">Vegfc</a> <a href="#">Zfhx3</a>                                                                                                                                                                                                                                                                                                                                                                                                                                                                                                                                                                                                                                                                                                                                                                                                                                                                                                                                                   |
| 27/737 | 0.0022092 | <a href="#">GO:200002</a> | regulation of multicellular organismal development  | <a href="#">Car2</a> <a href="#">Ccnd1</a> <a href="#">Cdk6</a> <a href="#">Dpysl3</a> <a href="#">Epha2</a> <a href="#">Fez1</a> <a href="#">Gli2</a> <a href="#">Hhex</a> <a href="#">Hoxa5</a> <a href="#">Id1</a> <a href="#">Irak3</a> <a href="#">Lama1</a> <a href="#">Mtap1b</a> <a href="#">Ncam1</a> <a href="#">Nefl</a> <a href="#">Neurod1</a> <a href="#">Notch4</a> <a href="#">Pten</a> <a href="#">Robo1</a> <a href="#">Serpine2</a> <a href="#">Sfrp1</a> <a href="#">Sfrp2</a> <a href="#">Spp1</a> <a href="#">Tek</a> <a href="#">Tiam1</a> <a href="#">Vegfc</a> <a href="#">Zfhx3</a>                                                                                                                                                                                                                                                                                                                                                                                                                                                                                                                                                                                                                                                                                 |
| 4/32   | 0.0022711 | <a href="#">GO:000854</a> | fibroblast growth factor receptor signaling pathway | <a href="#">Ctgf</a> <a href="#">Fgf15</a> <a href="#">Fgf17</a> <a href="#">Fgf4</a>                                                                                                                                                                                                                                                                                                                                                                                                                                                                                                                                                                                                                                                                                                                                                                                                                                                                                                                                                                                                                                                                                                                                                                                                         |
| 6/73   | 0.0023449 | <a href="#">GO:003523</a> | tube morphogenesis                                  | <a href="#">Gbx2</a> <a href="#">Gli2</a> <a href="#">Hhex</a> <a href="#">Hoxa5</a> <a href="#">Lama1</a> <a href="#">Nr3c1</a>                                                                                                                                                                                                                                                                                                                                                                                                                                                                                                                                                                                                                                                                                                                                                                                                                                                                                                                                                                                                                                                                                                                                                              |
| 9/149  | 0.0024126 | <a href="#">GO:000176</a> | morphogenesis of a branching structure              | <a href="#">Cited2</a> <a href="#">Gbx2</a> <a href="#">Gli2</a> <a href="#">Hhex</a> <a href="#">Hoxa5</a> <a href="#">Lama1</a> <a href="#">Notch4</a> <a href="#">Sfrp1</a> <a href="#">Sfrp2</a>                                                                                                                                                                                                                                                                                                                                                                                                                                                                                                                                                                                                                                                                                                                                                                                                                                                                                                                                                                                                                                                                                          |
| 5/52   | 0.0024908 | <a href="#">GO:007136</a> | cellular response to growth factor stimulus         | <a href="#">Ctgf</a> <a href="#">Fez1</a> <a href="#">Fgf15</a> <a href="#">Fgf17</a> <a href="#">Fgf4</a>                                                                                                                                                                                                                                                                                                                                                                                                                                                                                                                                                                                                                                                                                                                                                                                                                                                                                                                                                                                                                                                                                                                                                                                    |
| 8/123  | 0.0025029 | <a href="#">GO:004875</a> | branching morphogenesis                             | <a href="#">Cited2</a> <a href="#">Gbx2</a> <a href="#">Gli2</a> <a href="#">Hhex</a> <a href="#">Hoxa5</a> <a href="#">Lama1</a> <a href="#">Notch4</a> <a href="#">Sfrp2</a>                                                                                                                                                                                                                                                                                                                                                                                                                                                                                                                                                                                                                                                                                                                                                                                                                                                                                                                                                                                                                                                                                                                |

8/126 0.0029164 [4](#) of a tube  
[GO:006113](#) morphogenesis of a [Cited2 Gbx2 Hhex Hoxa5 Lama1 Notch4 Sfrp1 Sfrp2](#)  
 branching epithelium  
 18/434 0.0029366 [8](#)  
[GO:005109](#) positive regulation of [Adamts9 Car2 Fez1 Gli2 Hoxa5 Lmna Mtap1b Ncam1 Nefl](#)  
 developmental process [Neurod1 Pou4f2 Robo1 Sfrp1 Sfrp2 Tek Tiam1 Vegfc Zfhx3](#)

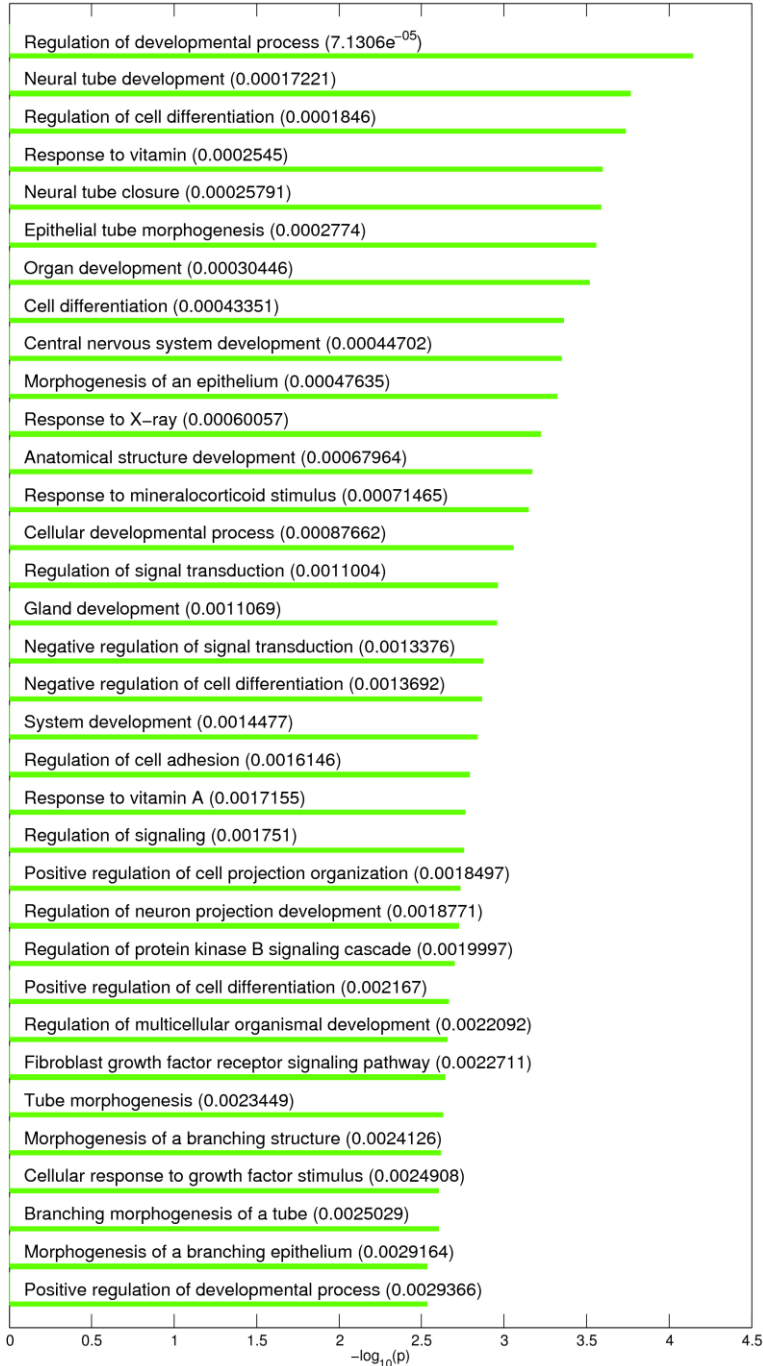

Figure 9: Plot bar of the  $-\log_{10}(p)$  of the significant enriched terms of Biological-process-PGC KO->-PGC CTRL-Log2(2.8284). The longer the bar, the higher is the statistical significance of the enrichment (in parenthesis are written the p-values)

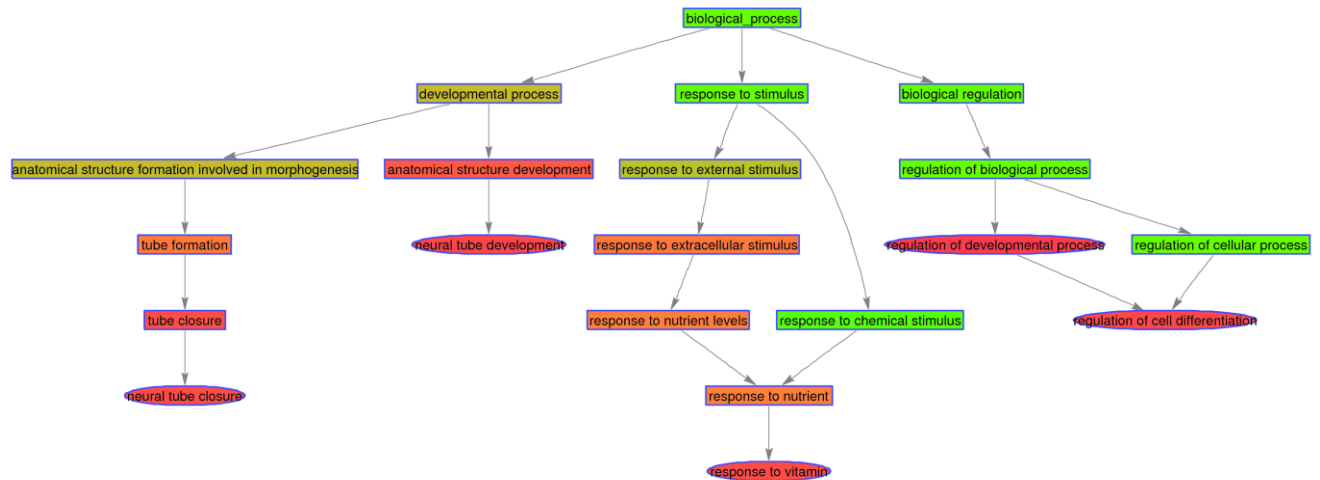

Figure 10: Direct acyclic graph (DAG) associated to the 5 top higher significant enriched gene ontology terms. The higher the significance of the term the more red is the box framing the term. The significant enriched terms are encircled by ellipses.

#### Cellular-component-PGC KO->-PGC CTRL-Log2(2.8284)

Table : Significant GO enrichment terms for Cellular-component-PGC KO->-PGC CTRL-Log2(2.8284)

| Count Ratio | p-val     | GO id                      | GO term                      | Genes                                                                                                                                                                                                                                                                                                                                                                                                                                                                                                                                                                                                                                                                                                                                                                                        |
|-------------|-----------|----------------------------|------------------------------|----------------------------------------------------------------------------------------------------------------------------------------------------------------------------------------------------------------------------------------------------------------------------------------------------------------------------------------------------------------------------------------------------------------------------------------------------------------------------------------------------------------------------------------------------------------------------------------------------------------------------------------------------------------------------------------------------------------------------------------------------------------------------------------------|
| 24/838<br>5 | 0.0005736 | <a href="#">GO:0042995</a> | cell projection              | <a href="#">Calca</a> <a href="#">Camk2n1</a> <a href="#">Car2</a> <a href="#">Cdk6</a> <a href="#">Crmp1</a> <a href="#">Dock4</a> <a href="#">Dpysl3</a> <a href="#">Enah</a> <a href="#">Fez1</a> <a href="#">Frmd4b</a> <a href="#">Gabbr1</a> <a href="#">Gli1</a> <a href="#">Gli2</a> <a href="#">Lrp2</a> <a href="#">Mtap1b</a> <a href="#">Ncam1</a> <a href="#">Nefl</a> <a href="#">Pten</a> <a href="#">Ptpn13</a> <a href="#">Rgs19</a> <a href="#">Robo1</a> <a href="#">Spp1</a> <a href="#">Stmn2</a> <a href="#">Tek</a>                                                                                                                                                                                                                                                   |
| 30/1203     | 0.0013145 | <a href="#">GO:0044459</a> | plasma membrane part         | <a href="#">Abca1</a> <a href="#">Abcb1b</a> <a href="#">Ank2</a> <a href="#">Anxa4</a> <a href="#">Atp1b2</a> <a href="#">B2m</a> <a href="#">Car2</a> <a href="#">Car4</a> <a href="#">Cdhr1</a> <a href="#">Cltb</a> <a href="#">Dmd</a> <a href="#">Dtna</a> <a href="#">Epha2</a> <a href="#">F2rl1</a> <a href="#">Gabbr1</a> <a href="#">Gpc4</a> <a href="#">Hck</a> <a href="#">Kcnj3</a> <a href="#">Laptm5</a> <a href="#">Lrp2</a> <a href="#">Ly75</a> <a href="#">Ncam1</a> <a href="#">Robo1</a> <a href="#">S100a10</a> <a href="#">Slc6a15</a> <a href="#">Slc6a8</a> <a href="#">Slc7a3</a> <a href="#">Slco4a1</a> <a href="#">Spred1</a> <a href="#">Tek</a>                                                                                                             |
| 19/655      | 0.0016804 | <a href="#">GO:0005615</a> | extracellular space          | <a href="#">Adamts9</a> <a href="#">B2m</a> <a href="#">Calca</a> <a href="#">Car2</a> <a href="#">Coch</a> <a href="#">Ctgf</a> <a href="#">Dpysl3</a> <a href="#">Enox1</a> <a href="#">Fgfbp1</a> <a href="#">Gpc4</a> <a href="#">Lama1</a> <a href="#">Lefty1</a> <a href="#">Lrp2</a> <a href="#">Pla2g1b</a> <a href="#">Serpine2</a> <a href="#">Sfrp2</a> <a href="#">Spp1</a> <a href="#">Sulf1</a> <a href="#">Vegfc</a>                                                                                                                                                                                                                                                                                                                                                          |
| 8/178       | 0.0022893 | <a href="#">GO:0030424</a> | axon                         | <a href="#">Calca</a> <a href="#">Car2</a> <a href="#">Fez1</a> <a href="#">Mtap1b</a> <a href="#">Ncam1</a> <a href="#">Nefl</a> <a href="#">Robo1</a> <a href="#">Stmn2</a>                                                                                                                                                                                                                                                                                                                                                                                                                                                                                                                                                                                                                |
| 26/1089     | 0.0046504 | <a href="#">GO:0000267</a> | cell fraction                | <a href="#">Abca1</a> <a href="#">Camk2n1</a> <a href="#">Car4</a> <a href="#">Ccadc88c</a> <a href="#">Dmd</a> <a href="#">Dpysl3</a> <a href="#">Dtna</a> <a href="#">Fgf4</a> <a href="#">Gabbr1</a> <a href="#">Gli2</a> <a href="#">Gpc4</a> <a href="#">Id1</a> <a href="#">Kif1b</a> <a href="#">Lmna</a> <a href="#">Lrp2</a> <a href="#">Mtap1b</a> <a href="#">Nr0b1</a> <a href="#">Pea15a</a> <a href="#">Plcd3</a> <a href="#">Plce1</a> <a href="#">Prps1</a> <a href="#">Prps2</a> <a href="#">Pten</a> <a href="#">Rgs19</a> <a href="#">Serpine2</a> <a href="#">Slc27a2</a>                                                                                                                                                                                                |
| 12/382      | 0.0055512 | <a href="#">GO:0031226</a> | intrinsic to plasma membrane | <a href="#">Abca1</a> <a href="#">Ank2</a> <a href="#">Car4</a> <a href="#">Cdhr1</a> <a href="#">Epha2</a> <a href="#">F2rl1</a> <a href="#">Laptm5</a> <a href="#">Slc6a15</a> <a href="#">Slc6a8</a> <a href="#">Slc7a3</a> <a href="#">Slco4a1</a> <a href="#">Tek</a>                                                                                                                                                                                                                                                                                                                                                                                                                                                                                                                   |
| 5/94        | 0.006436  | <a href="#">GO:0030055</a> | cell-substrate junction      | <a href="#">Cass4</a> <a href="#">Dmd</a> <a href="#">Enah</a> <a href="#">Lpp</a> <a href="#">Parvb</a>                                                                                                                                                                                                                                                                                                                                                                                                                                                                                                                                                                                                                                                                                     |
| 13/460      | 0.010055  | <a href="#">GO:0043005</a> | neuron projection            | <a href="#">Calca</a> <a href="#">Camk2n1</a> <a href="#">Car2</a> <a href="#">Crmp1</a> <a href="#">Fez1</a> <a href="#">Gabbr1</a> <a href="#">Mtap1b</a> <a href="#">Ncam1</a> <a href="#">Nefl</a> <a href="#">Pten</a> <a href="#">Ptpn13</a> <a href="#">Robo1</a> <a href="#">Stmn2</a>                                                                                                                                                                                                                                                                                                                                                                                                                                                                                               |
| 9/278       | 0.012253  | <a href="#">GO:0044297</a> | cell body                    | <a href="#">Calca</a> <a href="#">Camk2n1</a> <a href="#">Crmp1</a> <a href="#">Gabbr1</a> <a href="#">Mtap1b</a> <a href="#">Ncam1</a> <a href="#">Ptpn13</a> <a href="#">Robo1</a> <a href="#">Serpine2</a>                                                                                                                                                                                                                                                                                                                                                                                                                                                                                                                                                                                |
| 18/736      | 0.013251  | <a href="#">GO:0005829</a> | cytosol                      | <a href="#">Abhd5</a> <a href="#">Car2</a> <a href="#">Cbr3</a> <a href="#">Ccnd1</a> <a href="#">Ctgf</a> <a href="#">Dnmt3l</a> <a href="#">Enah</a> <a href="#">Gbp3</a> <a href="#">Gli1</a> <a href="#">Grb10</a> <a href="#">Gstt2</a> <a href="#">Mtap1b</a> <a href="#">Nr3c1</a> <a href="#">Plce1</a> <a href="#">Psrc1</a> <a href="#">Srxn1</a> <a href="#">Tcf7l2</a> <a href="#">Zfp361l</a>                                                                                                                                                                                                                                                                                                                                                                                   |
| 35/1705     | 0.013853  | <a href="#">GO:0005622</a> | intracellular                | <a href="#">Arhgap8</a> <a href="#">Bcar3</a> <a href="#">Bcl11a</a> <a href="#">Bnc2</a> <a href="#">Calca</a> <a href="#">Ccnd1</a> <a href="#">Eras</a> <a href="#">Foxp1</a> <a href="#">Gli1</a> <a href="#">Gli2</a> <a href="#">Grp1</a> <a href="#">Hspb8</a> <a href="#">Iqgap2</a> <a href="#">Klf12</a> <a href="#">Klf4</a> <a href="#">Klf9</a> <a href="#">Mcf2</a> <a href="#">Mras</a> <a href="#">Ncoa7</a> <a href="#">Nr3c1</a> <a href="#">Plagl1</a> <a href="#">Plce1</a> <a href="#">Rnd3</a> <a href="#">Rtkn</a> <a href="#">Srgap2</a> <a href="#">Tgtp1</a> <a href="#">Tiam1</a> <a href="#">Trim2</a> <a href="#">Trps1</a> <a href="#">Zfhx3</a> <a href="#">Zfp365</a> <a href="#">Zfp423</a> <a href="#">Zic2</a> <a href="#">Zic5</a> <a href="#">Zmat4</a> |
| 20/851      | 0.014737  | <a href="#">GO:0005626</a> | insoluble fraction           | <a href="#">Abca1</a> <a href="#">Camk2n1</a> <a href="#">Car4</a> <a href="#">Ccadc88c</a> <a href="#">Dmd</a> <a href="#">Dtna</a> <a href="#">Gabbr1</a> <a href="#">Gli2</a> <a href="#">Gpc4</a> <a href="#">Kif1b</a> <a href="#">Lmna</a> <a href="#">Lrp2</a> <a href="#">Nr0b1</a> <a href="#">Pea15a</a> <a href="#">Plcd3</a> <a href="#">Plce1</a> <a href="#">Pten</a> <a href="#">Rgs19</a> <a href="#">Serpine2</a> <a href="#">Slc27a2</a>                                                                                                                                                                                                                                                                                                                                   |
| 7/196       | 0.015525  | <a href="#">GO:0016324</a> | apical plasma membrane       | <a href="#">Abcb1b</a> <a href="#">Ank2</a> <a href="#">Anxa4</a> <a href="#">Atp1b2</a> <a href="#">Car4</a> <a href="#">Lrp2</a> <a href="#">Tek</a>                                                                                                                                                                                                                                                                                                                                                                                                                                                                                                                                                                                                                                       |
| 4/84        | 0.021809  | <a href="#">GO:0005925</a> | focal adhesion               | <a href="#">Cass4</a> <a href="#">Enah</a> <a href="#">Lpp</a> <a href="#">Parvb</a>                                                                                                                                                                                                                                                                                                                                                                                                                                                                                                                                                                                                                                                                                                         |

|       |          |                                               |                                                                                                                                                                                        |
|-------|----------|-----------------------------------------------|----------------------------------------------------------------------------------------------------------------------------------------------------------------------------------------|
| 8/270 | 0.030882 | <a href="#">GO:0043025</a> neuronal cell body | <a href="#">Calca</a> <a href="#">Camk2n1</a> <a href="#">Crmp1</a> <a href="#">Gabbr1</a> <a href="#">Mtap1b</a> <a href="#">Ncam1</a> <a href="#">Robo1</a> <a href="#">Serpine2</a> |
| 5/140 | 0.037938 | <a href="#">GO:0000785</a> chromatin          | <a href="#">Chd7</a> <a href="#">Cited2</a> <a href="#">Dnmt3l</a> <a href="#">Klf4</a> <a href="#">Mbd2</a>                                                                           |
| 8/281 | 0.039203 | <a href="#">GO:0009986</a> cell surface       | <a href="#">Ceacam1</a> <a href="#">Dmd</a> <a href="#">Fgfbp1</a> <a href="#">Kcni3</a> <a href="#">Notch4</a> <a href="#">Robo1</a> <a href="#">Sulf1</a> <a href="#">Tek</a>        |
| 6/192 | 0.046114 | <a href="#">GO:0045121</a> membrane raft      | <a href="#">Abca1</a> <a href="#">Dmd</a> <a href="#">Gabbr1</a> <a href="#">Hck</a> <a href="#">Spred1</a> <a href="#">Tek</a>                                                        |

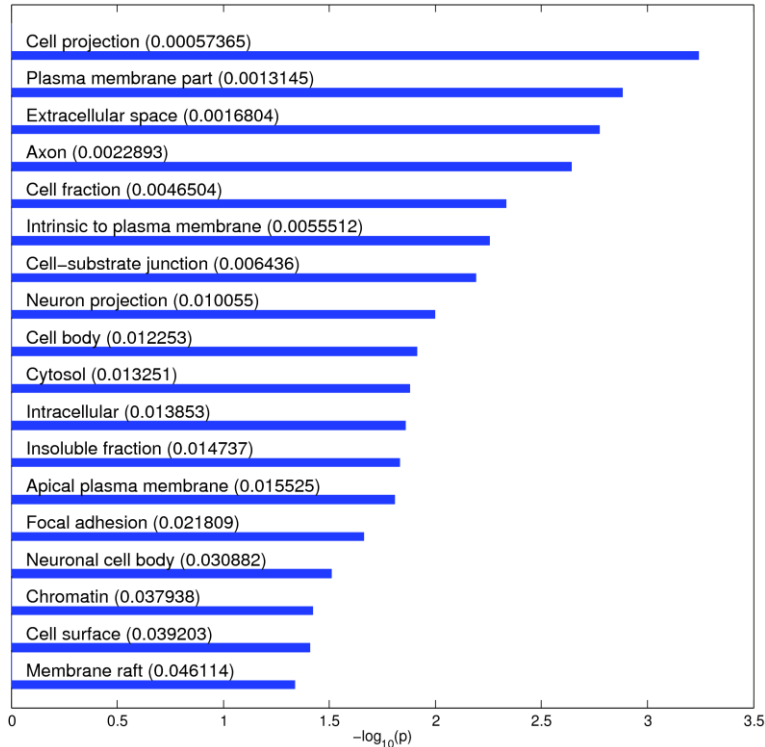

Figure 11: Plot bar of the  $-\log_{10}(p)$  of the significant enriched terms of Cellular-component-PGC KO->-PGC CTRL-Log2(2.8284). The longer the bar, the higher is the statistical significance of the enrichment (in parenthesis are written the p-values)

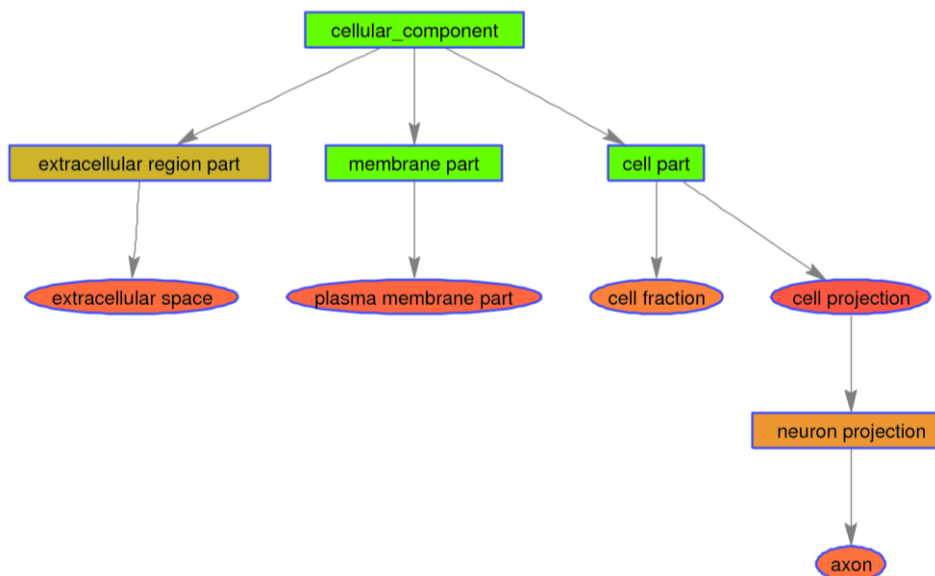

Figure 12: Direct acyclic graph (DAG) associated to the 5 top higher significant enriched gene ontology terms. The higher the significance of the term the more red is the box framing the term. The significant enriched terms are encircled by ellipses.

### **2.3 Down-regulated in PGC KO in relation to PGC CTRL**

Number of probes fulfilling the condition: 208.

In the following figures, the expression of the 208 probes is distributed into 2 heat maps. Each one with 104 probes. The last one with 104 probes.

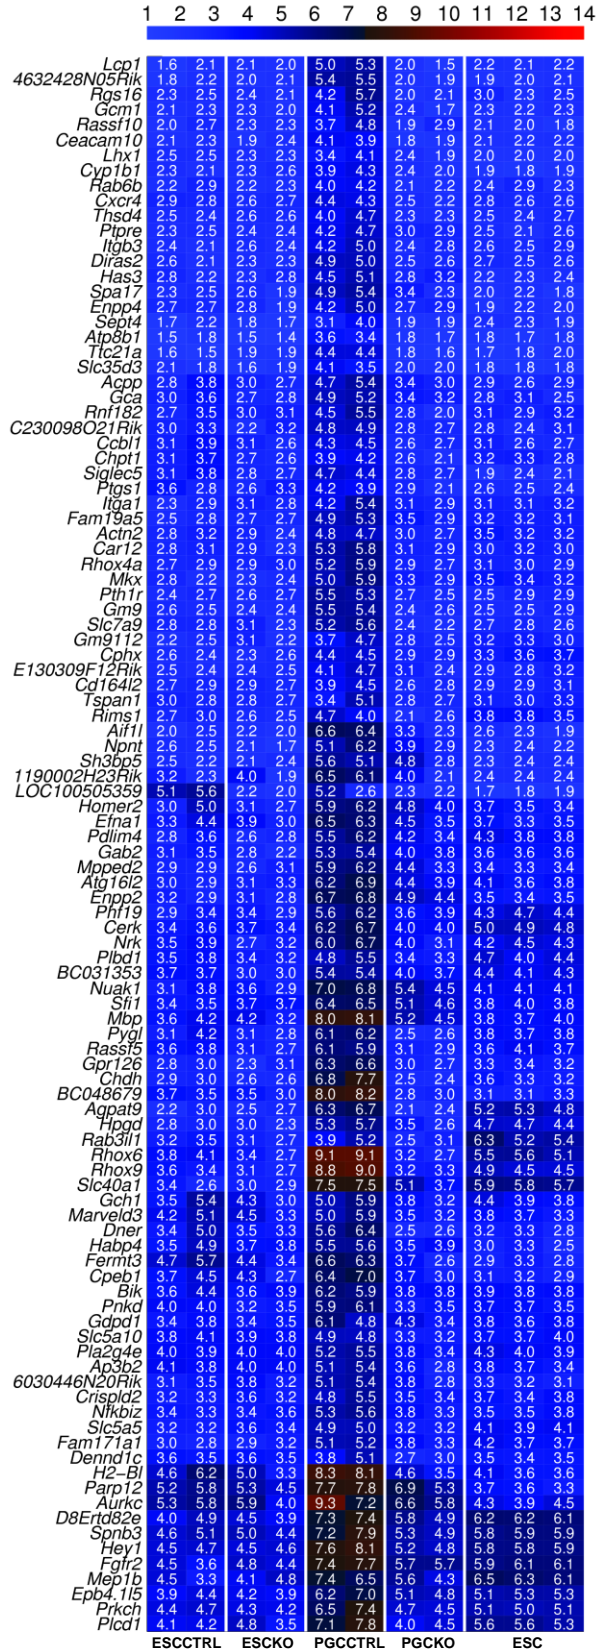

Figure : Heat map number 1 (104 probes of 20

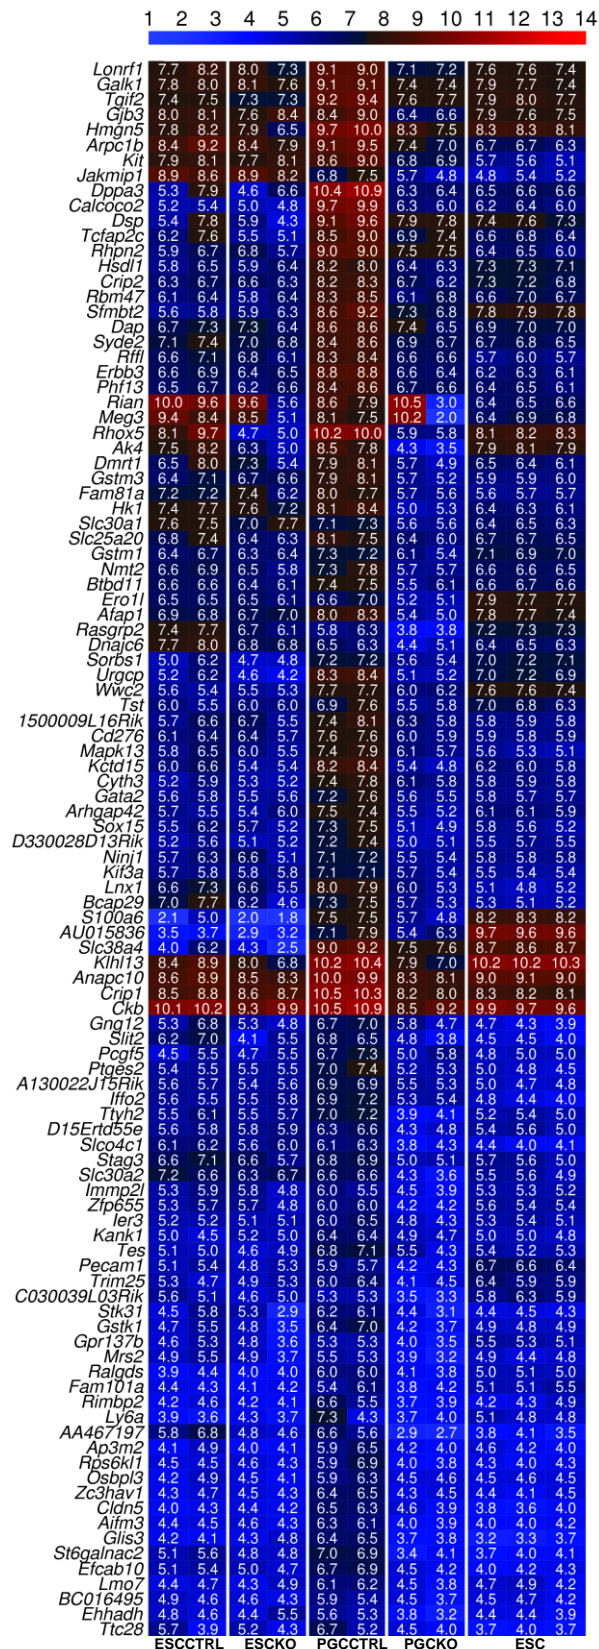



## 2.4 GO enrichment analysis of PGC KO-<-PGC CTRL-Log2(2.8284)

Number of probes in the signal set 208

Number of unique probes in the signal set 208

Number of probes in the background set 45101

Number of unique probes in the background set 21390

Table : GO terms of PGC KO-<-PGC CTRL-Log2(2.8284)-molecular-function

| GO                         | Ter                              |
|----------------------------|----------------------------------|
| <a href="#">GO:0000166</a> | nucleotide binding (3%)          |
| <a href="#">GO:0003824</a> | catalytic activity (3.8%)        |
| <a href="#">GO:0005515</a> | protein binding (8.5%)           |
| <a href="#">GO:0017076</a> | purine nucleotide binding (8.5%) |
| <a href="#">GO:0005488</a> | binding (11%)                    |
| <a href="#">GO:0043167</a> | ion binding (13%)                |
| Others                     | Others (53%)                     |

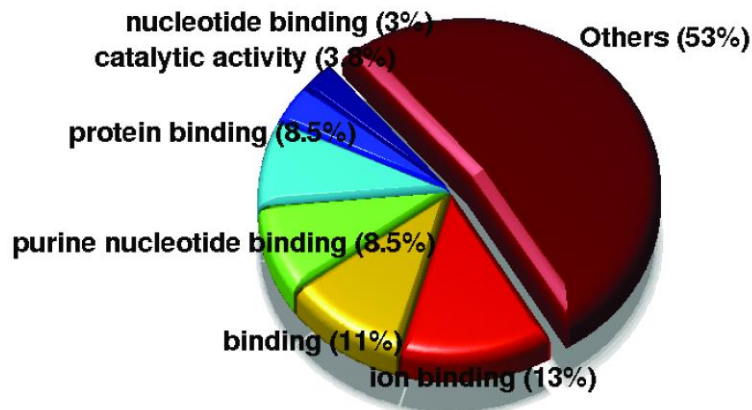

Figure : Pie graph of PGC KO-<-PGC CTRL-Log2(2.8284)-molecular-function

Table : GO terms of PGC KO-<-PGC CTRL-Log2(2.8284)-biological-process

| GO                         | Ter                                                  |
|----------------------------|------------------------------------------------------|
| <a href="#">GO:0009889</a> | regulation of biosynthetic process (3.1%)            |
| <a href="#">GO:0060255</a> | regulation of macromolecule metabolic process (3.2%) |
| <a href="#">GO:0031323</a> | regulation of cellular metabolic process (3.2%)      |
| <a href="#">GO:0050896</a> | response to stimulus (3.4%)                          |
| <a href="#">GO:0016043</a> | cellular component organization (3.6%)               |
| <a href="#">GO:0050789</a> | regulation of biological process (3.6%)              |
| <a href="#">GO:0044237</a> | cellular metabolic process (3.8%)                    |
| <a href="#">GO:0006810</a> | transport (3.8%)                                     |
| <a href="#">GO:0019538</a> | protein metabolic process (3.9%)                     |
| <a href="#">GO:0032502</a> | developmental process (8.1%)                         |
| <a href="#">GO:0050794</a> | regulation of cellular process (9.7%)                |
| Others                     | Others (51%)                                         |

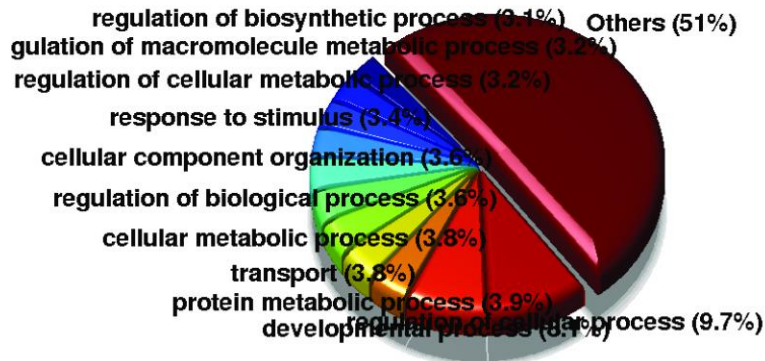

Figure : Pie graph of PGC KO vs PGC CTRL-Log2(2.8284)-biological-process

Table : GO terms of PGC KO vs PGC CTRL-Log2(2.8284)-cellular-component

| GO                         | Ter                                            |
|----------------------------|------------------------------------------------|
| <a href="#">GO:0044446</a> | intracellular organelle part (3.1%)            |
| <a href="#">GO:0043234</a> | protein complex (3.3%)                         |
| <a href="#">GO:0044422</a> | organelle part (3.3%)                          |
| <a href="#">GO:0044459</a> | plasma membrane part (3.3%)                    |
| <a href="#">GO:0030054</a> | cell junction (3.3%)                           |
| <a href="#">GO:0031090</a> | organelle membrane (3.5%)                      |
| <a href="#">GO:0044444</a> | cytoplasmic part (4.5%)                        |
| <a href="#">GO:0043227</a> | membrane-bounded organelle (4.9%)              |
| <a href="#">GO:0044425</a> | membrane part (4.9%)                           |
| <a href="#">GO:0043226</a> | organelle (5.7%)                               |
| <a href="#">GO:0043229</a> | intracellular organelle (5.7%)                 |
| <a href="#">GO:0031224</a> | intrinsic to membrane (6.7%)                   |
| <a href="#">GO:0016020</a> | membrane (8.1%)                                |
| <a href="#">GO:0044424</a> | intracellular part (11%)                       |
| <a href="#">GO:0043231</a> | intracellular membrane-bounded organelle (11%) |
| Others                     | Others (18%)                                   |

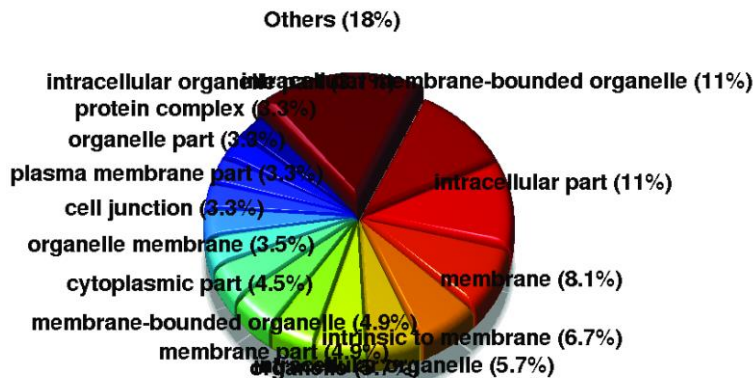

Figure : Pie graph of PGC KO vs PGC CTRL-Log2(2.8284)-cellular-component

**Molecular-function-PGC KO vs PGC CTRL-Log2(2.8284)**

Table : Significant GO enrichment terms for Molecular-function-PGC KO vs PGC CTRL-Log2(2.8284)

| Count Ratio | p-val     | GO id                      | GO term                   | Genes                                                                                                          |
|-------------|-----------|----------------------------|---------------------------|----------------------------------------------------------------------------------------------------------------|
| 5/64        | 0.0007710 | <a href="#">GO:0030674</a> | protein binding, bridging | <a href="#">Actn2</a> <a href="#">Arhgap42</a> <a href="#">Dsp</a> <a href="#">Gab2</a> <a href="#">Sorbs1</a> |

|         |           |                            |                                                        |                                                                                                                                                                                                                                                                                                                                                                                                                                                                                                                                                                                                                                                                                                                                            |
|---------|-----------|----------------------------|--------------------------------------------------------|--------------------------------------------------------------------------------------------------------------------------------------------------------------------------------------------------------------------------------------------------------------------------------------------------------------------------------------------------------------------------------------------------------------------------------------------------------------------------------------------------------------------------------------------------------------------------------------------------------------------------------------------------------------------------------------------------------------------------------------------|
|         | 7         |                            |                                                        |                                                                                                                                                                                                                                                                                                                                                                                                                                                                                                                                                                                                                                                                                                                                            |
| 5/79    | 0.0020455 | <a href="#">GO:0019887</a> | protein kinase regulator activity                      | <a href="#">1190002H23Rik</a> <a href="#">Efcab10</a> <a href="#">Erbp3</a> <a href="#">Sh3bp5</a> <a href="#">Spa17</a>                                                                                                                                                                                                                                                                                                                                                                                                                                                                                                                                                                                                                   |
| 4/54    | 0.0029211 | <a href="#">GO:0005178</a> | integrin binding                                       | <a href="#">Fermt3</a> <a href="#">Itga1</a> <a href="#">Itgb3</a> <a href="#">Npnt</a>                                                                                                                                                                                                                                                                                                                                                                                                                                                                                                                                                                                                                                                    |
| 5/106   | 0.0075256 | <a href="#">GO:0017124</a> | SH3 domain binding                                     | <a href="#">Afap1</a> <a href="#">Arhgap42</a> <a href="#">Dnajc6</a> <a href="#">Rims1</a> <a href="#">Sh3bp5</a>                                                                                                                                                                                                                                                                                                                                                                                                                                                                                                                                                                                                                         |
| 8/237   | 0.0082492 | <a href="#">GO:0030246</a> | carbohydrate binding                                   | <a href="#">Crispld2</a> <a href="#">Enpp2</a> <a href="#">Fgfr2</a> <a href="#">Galk1</a> <a href="#">Habp4</a> <a href="#">Hk1</a> <a href="#">Siglec5</a> <a href="#">Slit2</a>                                                                                                                                                                                                                                                                                                                                                                                                                                                                                                                                                         |
| 18/814  | 0.015394  | <a href="#">GO:0016301</a> | kinase activity                                        | <a href="#">Ak4</a> <a href="#">Aurkc</a> <a href="#">BC016495</a> <a href="#">Cerk</a> <a href="#">Ckb</a> <a href="#">D8Ert82e</a> <a href="#">Erbp3</a> <a href="#">Fgfr2</a> <a href="#">Galk1</a> <a href="#">Hk1</a> <a href="#">Jakmip1</a> <a href="#">Kit</a> <a href="#">Mapk13</a> <a href="#">Nr</a> <a href="#">Nuak1</a> <a href="#">Prkch</a> <a href="#">Rps6kl1</a> <a href="#">Stk31</a>                                                                                                                                                                                                                                                                                                                                 |
| 8/280   | 0.021322  | <a href="#">GO:0048037</a> | cofactor binding                                       | <a href="#">Aifm3</a> <a href="#">Cdbl1</a> <a href="#">Chdh</a> <a href="#">Ehhadh</a> <a href="#">Ero1l</a> <a href="#">Gch1</a> <a href="#">Hpgd</a> <a href="#">Pygl</a>                                                                                                                                                                                                                                                                                                                                                                                                                                                                                                                                                               |
| 32/1721 | 0.021883  | <a href="#">GO:0016740</a> | transferase activity                                   | <a href="#">A130022J15Rik</a> <a href="#">Agpat9</a> <a href="#">Ak4</a> <a href="#">Aurkc</a> <a href="#">BC016495</a> <a href="#">Cdbl1</a> <a href="#">Cerk</a> <a href="#">Chpt1</a> <a href="#">Ckb</a> <a href="#">D8Ert82e</a> <a href="#">Erbp3</a> <a href="#">Fgfr2</a> <a href="#">Galk1</a> <a href="#">Gstk1</a> <a href="#">Gstm1</a> <a href="#">Gstm3</a> <a href="#">Has3</a> <a href="#">Hk1</a> <a href="#">Jakmip1</a> <a href="#">Kit</a> <a href="#">Mapk13</a> <a href="#">Nmt2</a> <a href="#">Nr</a> <a href="#">Nuak1</a> <a href="#">Parp12</a> <a href="#">Prkch</a> <a href="#">Pygl</a> <a href="#">Rps6kl1</a> <a href="#">St6galnac2</a> <a href="#">Stk31</a> <a href="#">Tst</a> <a href="#">Zc3hav1</a> |
| 12/501  | 0.023829  | <a href="#">GO:0008092</a> | cytoskeletal protein binding                           | <a href="#">Actn2</a> <a href="#">Afap1</a> <a href="#">Aif1l</a> <a href="#">Arhgap42</a> <a href="#">Arpc1b</a> <a href="#">Epb4.115</a> <a href="#">Homer2</a> <a href="#">Jakmip1</a> <a href="#">Lcp1</a> <a href="#">Lmo7</a> <a href="#">S100a6</a> <a href="#">Spnb3</a>                                                                                                                                                                                                                                                                                                                                                                                                                                                           |
| 15/687  | 0.02817   | <a href="#">GO:0016773</a> | phosphotransferase activity, alcohol group as acceptor | <a href="#">Aurkc</a> <a href="#">BC016495</a> <a href="#">Cerk</a> <a href="#">D8Ert82e</a> <a href="#">Erbp3</a> <a href="#">Fgfr2</a> <a href="#">Galk1</a> <a href="#">Hk1</a> <a href="#">Kit</a> <a href="#">Mapk13</a> <a href="#">Nr</a> <a href="#">Nuak1</a> <a href="#">Prkch</a> <a href="#">Rps6kl1</a> <a href="#">Stk31</a>                                                                                                                                                                                                                                                                                                                                                                                                 |
| 6/197   | 0.032144  | <a href="#">GO:0050662</a> | coenzyme binding                                       | <a href="#">Aifm3</a> <a href="#">Chdh</a> <a href="#">Ehhadh</a> <a href="#">Ero1l</a> <a href="#">Gch1</a> <a href="#">Hpgd</a>                                                                                                                                                                                                                                                                                                                                                                                                                                                                                                                                                                                                          |
| 5/151   | 0.03421   | <a href="#">GO:0001871</a> | pattern binding                                        | <a href="#">Crispld2</a> <a href="#">Enpp2</a> <a href="#">Fgfr2</a> <a href="#">Habp4</a> <a href="#">Slit2</a>                                                                                                                                                                                                                                                                                                                                                                                                                                                                                                                                                                                                                           |

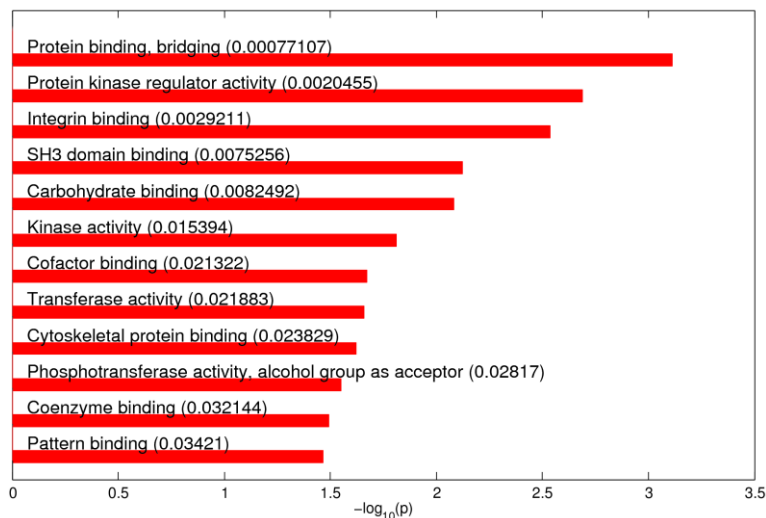

Figure : Plot bar of the  $-\log_{10}(p)$  of the significant enriched terms of Molecular-function-PGC KO-<-PGC CTRL-Log2(2.8284). The longer the bar, the higher is the statistical significance of the enrichment (in parenthesis are written the p-values)

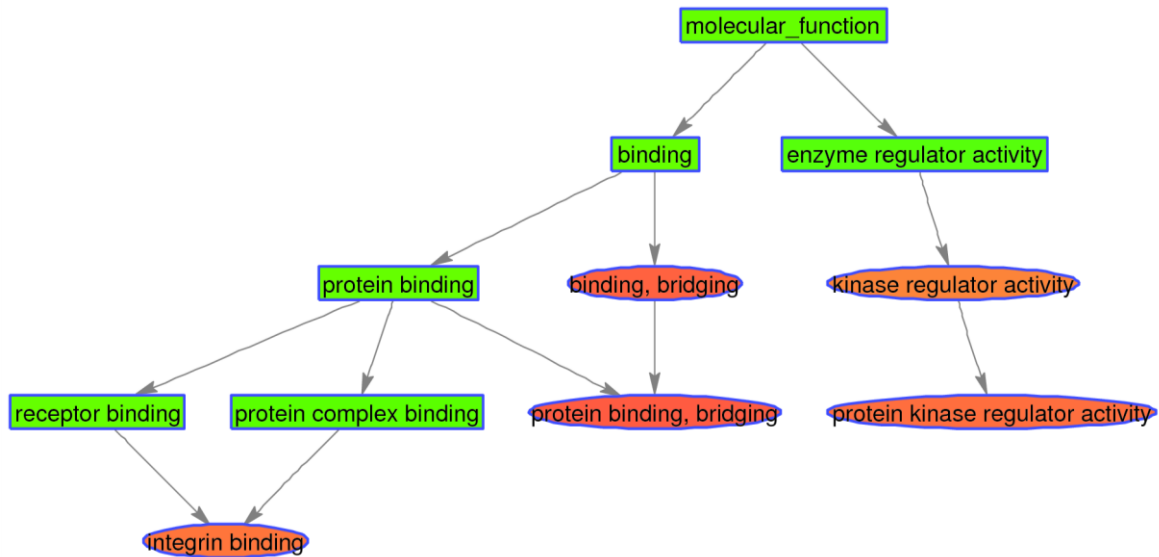

Figure : Direct acyclic graph (DAG) associated to the 5 top higher significant enriched gene ontology terms. The higher the significance of the term the more red is the box framing the term. The significant enriched terms are encircled by ellipses.

#### Biological-process-PGC KO-<-PGC CTRL-Log2(2.8284)

Table : Significant GO enrichment terms for Biological-process-PGC KO-<-PGC CTRL-Log2(2.8284)

| Count Ratio | p-val    | GO id                      | GO term                                 | Genes                                                                                                                                                                                                                                                                                                                                                                                                                                                                                               |
|-------------|----------|----------------------------|-----------------------------------------|-----------------------------------------------------------------------------------------------------------------------------------------------------------------------------------------------------------------------------------------------------------------------------------------------------------------------------------------------------------------------------------------------------------------------------------------------------------------------------------------------------|
| 4/47        | 0.001215 | <a href="#">GO:0001657</a> | ureteric bud development                | <a href="#">Fgfr2</a> <a href="#">Lhx1</a> <a href="#">Npnt</a> <a href="#">Slit2</a>                                                                                                                                                                                                                                                                                                                                                                                                               |
| 4/49        | 0.001428 | <a href="#">GO:0034330</a> | cell junction organization              | <a href="#">Actn2</a> <a href="#">Dsp</a> <a href="#">Itgb3</a> <a href="#">Sorbs1</a>                                                                                                                                                                                                                                                                                                                                                                                                              |
| 19/884      | 0.006905 | <a href="#">GO:0016310</a> | phosphorylation                         | <a href="#">Aurkc</a> <a href="#">BC016495</a> <a href="#">Ckb</a> <a href="#">D8Ert82e</a> <a href="#">Efna1</a> <a href="#">Erb3</a> <a href="#">Fgfr2</a> <a href="#">Galk1</a> <a href="#">Hk1</a> <a href="#">Itga1</a> <a href="#">Jakmip1</a> <a href="#">Kit</a> <a href="#">Mapk13</a> <a href="#">Nr</a> <a href="#">Nuak1</a> <a href="#">Prkch</a> <a href="#">Ptpre</a> <a href="#">Rps6kl1</a> <a href="#">Stk31</a>                                                                  |
| 6/160       | 0.007350 | <a href="#">GO:0016042</a> | lipid catabolic process                 | <a href="#">Ehhadh</a> <a href="#">Enpp2</a> <a href="#">Homer2</a> <a href="#">Pla2g4e</a> <a href="#">Plbd1</a> <a href="#">Plcd1</a>                                                                                                                                                                                                                                                                                                                                                             |
| 17/772      | 0.007969 | <a href="#">GO:0006629</a> | lipid metabolic process                 | <a href="#">Agpat9</a> <a href="#">Atp8b1</a> <a href="#">Cerk</a> <a href="#">Chpt1</a> <a href="#">Cyp1b1</a> <a href="#">Ehhadh</a> <a href="#">Enpp2</a> <a href="#">Gdpd1</a> <a href="#">Homer2</a> <a href="#">Hpgd</a> <a href="#">Kit</a> <a href="#">Osbp3</a> <a href="#">Pla2g4e</a> <a href="#">Plbd1</a> <a href="#">Plcd1</a> <a href="#">Ptges2</a> <a href="#">Ptgs1</a>                                                                                                           |
| 15/657      | 0.008662 | <a href="#">GO:0006468</a> | protein phosphorylation                 | <a href="#">Aurkc</a> <a href="#">D8Ert82e</a> <a href="#">Efna1</a> <a href="#">Erb3</a> <a href="#">Fgfr2</a> <a href="#">Hk1</a> <a href="#">Itga1</a> <a href="#">Kit</a> <a href="#">Mapk13</a> <a href="#">Nr</a> <a href="#">Nuak1</a> <a href="#">Prkch</a> <a href="#">Ptpre</a> <a href="#">Rps6kl1</a> <a href="#">Stk31</a>                                                                                                                                                             |
| 22/112      | 0.011887 | <a href="#">GO:0006793</a> | phosphorus metabolic process            | <a href="#">Acpp</a> <a href="#">Aurkc</a> <a href="#">BC016495</a> <a href="#">Ckb</a> <a href="#">D8Ert82e</a> <a href="#">Dnaic6</a> <a href="#">Efna1</a> <a href="#">Erb3</a> <a href="#">Fgfr2</a> <a href="#">Galk1</a> <a href="#">Hk1</a> <a href="#">Itga1</a> <a href="#">Jakmip1</a> <a href="#">Kit</a> <a href="#">Mapk13</a> <a href="#">Nr</a> <a href="#">Nuak1</a> <a href="#">Prkch</a> <a href="#">Ptpre</a> <a href="#">Pygl</a> <a href="#">Rps6kl1</a> <a href="#">Stk31</a> |
| 7/243       | 0.017123 | <a href="#">GO:0030334</a> | regulation of cell migration            | <a href="#">Cxcr4</a> <a href="#">Efna1</a> <a href="#">Epb4.115</a> <a href="#">Itgb3</a> <a href="#">Kit</a> <a href="#">Pecam1</a> <a href="#">Slit2</a>                                                                                                                                                                                                                                                                                                                                         |
| 7/246       | 0.018251 | <a href="#">GO:0023034</a> | intracellular signal transduction       | <a href="#">Dmrt1</a> <a href="#">Gab2</a> <a href="#">Plcd1</a> <a href="#">Prkch</a> <a href="#">Rasgrp2</a> <a href="#">Rassf5</a> <a href="#">Sh3bp5</a>                                                                                                                                                                                                                                                                                                                                        |
| 6/196       | 0.019211 | <a href="#">GO:0002009</a> | morphogenesis of an epithelium          | <a href="#">Cxcr4</a> <a href="#">Epb4.115</a> <a href="#">Fgfr2</a> <a href="#">Gcm1</a> <a href="#">Npnt</a> <a href="#">Slit2</a>                                                                                                                                                                                                                                                                                                                                                                |
| 5/149       | 0.020617 | <a href="#">GO:0001763</a> | morphogenesis of a branching structure  | <a href="#">Cxcr4</a> <a href="#">Fgfr2</a> <a href="#">Gcm1</a> <a href="#">Npnt</a> <a href="#">Slit2</a>                                                                                                                                                                                                                                                                                                                                                                                         |
| 6/200       | 0.021138 | <a href="#">GO:0001701</a> | in utero embryonic development          | <a href="#">Epb4.115</a> <a href="#">Fgfr2</a> <a href="#">Gjb3</a> <a href="#">Kif3a</a> <a href="#">Slc30a1</a> <a href="#">Slit2</a>                                                                                                                                                                                                                                                                                                                                                             |
| 5/151       | 0.021852 | <a href="#">GO:0048858</a> | cell projection morphogenesis           | <a href="#">Erb3</a> <a href="#">Fgfr2</a> <a href="#">Itga1</a> <a href="#">Kif3a</a> <a href="#">Slit2</a>                                                                                                                                                                                                                                                                                                                                                                                        |
| 5/151       | 0.021923 | <a href="#">GO:0090066</a> | regulation of anatomical structure size | <a href="#">Arpc1b</a> <a href="#">Gch1</a> <a href="#">Itga1</a> <a href="#">Kank1</a> <a href="#">Slit2</a>                                                                                                                                                                                                                                                                                                                                                                                       |

|             |          |                            |                                                              |                                                                                                                                                                                                                                                                                                                                                                                                                                                                                                                      |
|-------------|----------|----------------------------|--------------------------------------------------------------|----------------------------------------------------------------------------------------------------------------------------------------------------------------------------------------------------------------------------------------------------------------------------------------------------------------------------------------------------------------------------------------------------------------------------------------------------------------------------------------------------------------------|
| 18/955      | 0.028686 | <a href="#">GO:0032879</a> | regulation of localization                                   | <a href="#">Cxcr4</a> <a href="#">Efna1</a> <a href="#">Epb4.115</a> <a href="#">Erbb3</a> <a href="#">Gab2</a> <a href="#">Gata2</a> <a href="#">Hk1</a> <a href="#">Itgb3</a> <a href="#">Kctd15</a> <a href="#">Kif3a</a> <a href="#">Kit</a> <a href="#">Lcp1</a> <a href="#">Pecam1</a> <a href="#">Plcd1</a> <a href="#">Ptgs1</a> <a href="#">Slc30a1</a> <a href="#">Slit2</a> <a href="#">Sorbs1</a>                                                                                                        |
| 4/114       | 0.030141 | <a href="#">GO:0010769</a> | regulation of cell morphogenesis involved in differentiation | <a href="#">Efna1</a> <a href="#">Epb4.115</a> <a href="#">Mbp</a> <a href="#">Slit2</a>                                                                                                                                                                                                                                                                                                                                                                                                                             |
| 5/164       | 0.030752 | <a href="#">GO:0040017</a> | positive regulation of locomotion                            | <a href="#">Epb4.115</a> <a href="#">Itgb3</a> <a href="#">Kit</a> <a href="#">Pecam1</a> <a href="#">Slit2</a>                                                                                                                                                                                                                                                                                                                                                                                                      |
| 5/168       | 0.033884 | <a href="#">GO:0030155</a> | regulation of cell adhesion                                  | <a href="#">Cyth3</a> <a href="#">Epb4.115</a> <a href="#">Erbb3</a> <a href="#">Fermt3</a> <a href="#">Npnt</a>                                                                                                                                                                                                                                                                                                                                                                                                     |
| 6/225       | 0.03645  | <a href="#">GO:0048610</a> | cellular process involved in reproduction                    | <a href="#">Cxcr4</a> <a href="#">Fgfr2</a> <a href="#">Kit</a> <a href="#">Rhox5</a> <a href="#">Sept4</a> <a href="#">Spa17</a>                                                                                                                                                                                                                                                                                                                                                                                    |
| 12/590      | 0.038336 | <a href="#">GO:0007155</a> | cell adhesion                                                | <a href="#">Cldn5</a> <a href="#">Dsp</a> <a href="#">Epb4.115</a> <a href="#">Fermt3</a> <a href="#">Itga1</a> <a href="#">Itgb3</a> <a href="#">Lmo7</a> <a href="#">Ninj1</a> <a href="#">Npnt</a> <a href="#">Pecam1</a> <a href="#">Siglec5</a> <a href="#">Slit2</a>                                                                                                                                                                                                                                           |
| 5/176       | 0.040794 | <a href="#">GO:0044087</a> | regulation of cellular component biogenesis                  | <a href="#">Apc1b</a> <a href="#">Epb4.115</a> <a href="#">Kank1</a> <a href="#">Kit</a> <a href="#">Slit2</a>                                                                                                                                                                                                                                                                                                                                                                                                       |
| 4/126       | 0.042585 | <a href="#">GO:0061138</a> | morphogenesis of a branching epithelium                      | <a href="#">Cxcr4</a> <a href="#">Fgfr2</a> <a href="#">Gcm1</a> <a href="#">Npnt</a>                                                                                                                                                                                                                                                                                                                                                                                                                                |
| 4/127       | 0.043802 | <a href="#">GO:0032147</a> | activation of protein kinase activity                        | <a href="#">Efna1</a> <a href="#">Itga1</a> <a href="#">Itgb3</a> <a href="#">Nr</a>                                                                                                                                                                                                                                                                                                                                                                                                                                 |
| 7/292       | 0.04418  | <a href="#">GO:0003006</a> | developmental process involved in reproduction               | <a href="#">Bik</a> <a href="#">Cxcr4</a> <a href="#">Dmrt1</a> <a href="#">Fgfr2</a> <a href="#">Kit</a> <a href="#">Rhox5</a> <a href="#">Sept4</a>                                                                                                                                                                                                                                                                                                                                                                |
| 7/296       | 0.047299 | <a href="#">GO:0007167</a> | enzyme linked receptor protein signaling pathway             | <a href="#">Efna1</a> <a href="#">Erbb3</a> <a href="#">Fgfr2</a> <a href="#">Hpgd</a> <a href="#">Kit</a> <a href="#">Ptpre</a> <a href="#">Sorbs1</a>                                                                                                                                                                                                                                                                                                                                                              |
| 23/136<br>3 | 0.048933 | <a href="#">GO:0007166</a> | cell surface receptor signaling pathway                      | <a href="#">Cerk</a> <a href="#">Cxcr4</a> <a href="#">Dner</a> <a href="#">Efna1</a> <a href="#">Erbb3</a> <a href="#">Fgfr2</a> <a href="#">Gab2</a> <a href="#">Gng12</a> <a href="#">Gpr126</a> <a href="#">Hey1</a> <a href="#">Homer2</a> <a href="#">Hpgd</a> <a href="#">Itga1</a> <a href="#">Itgb3</a> <a href="#">Kif3a</a> <a href="#">Kit</a> <a href="#">Meg3</a> <a href="#">Plcd1</a> <a href="#">Pth1r</a> <a href="#">Ptpre</a> <a href="#">Rgs16</a> <a href="#">Slit2</a> <a href="#">Sorbs1</a> |

---

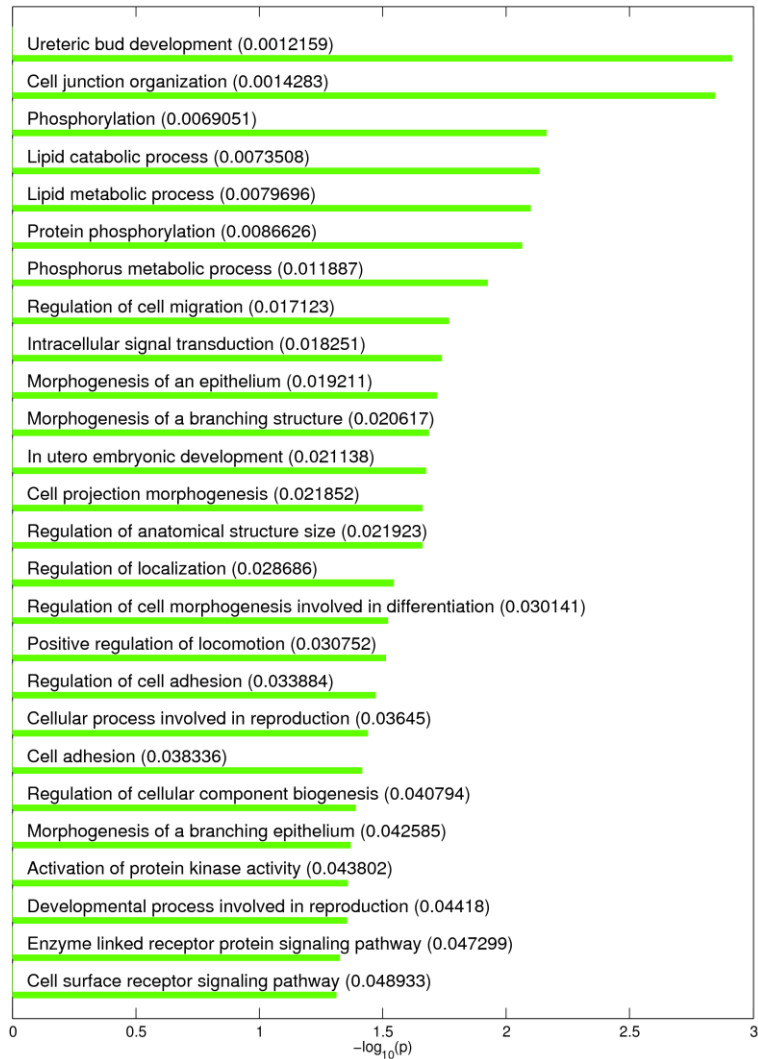

Figure : Plot bar of the  $-\log_{10}(p)$  of the significant enriched terms of Biological-process-PGC KO-<-PGC CTRL-Log2(2.8284). The longer the bar, the higher is the statistical significance of the enrichment (in parenthesis are written the p-values)

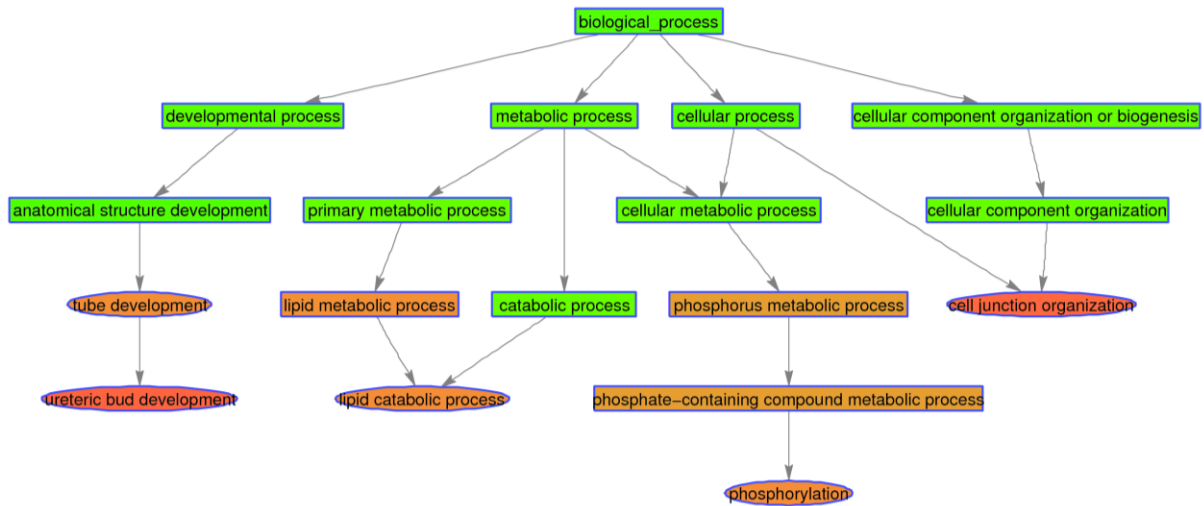

Figure : Direct acyclic graph (DAG) associated to the 5 top higher significant enriched gene ontology terms. The higher the significance of the term the more red is the box framing the term. The significant enriched terms are encircled by ellipses.

#### Cellular-component-PGC KO-<-PGC CTRL-Log2(2.8284)

Table : Significant GO enrichment terms for Cellular-component-PGC KO-<-PGC CTRL-Log2(2.8284)

| Count Ratio | p-val      | GO id                      | GO term                  | Genes                                                                                                                                                                                                                                                                                                                                                                                                                                                                                                                                                                                                                                                                                                                                                                                                                                                                                                                                                                                                                                                                                                                                                                                                                                                                                                                                                                                                                                                                                                                                                                                                                                                                                                                                                                                            |
|-------------|------------|----------------------------|--------------------------|--------------------------------------------------------------------------------------------------------------------------------------------------------------------------------------------------------------------------------------------------------------------------------------------------------------------------------------------------------------------------------------------------------------------------------------------------------------------------------------------------------------------------------------------------------------------------------------------------------------------------------------------------------------------------------------------------------------------------------------------------------------------------------------------------------------------------------------------------------------------------------------------------------------------------------------------------------------------------------------------------------------------------------------------------------------------------------------------------------------------------------------------------------------------------------------------------------------------------------------------------------------------------------------------------------------------------------------------------------------------------------------------------------------------------------------------------------------------------------------------------------------------------------------------------------------------------------------------------------------------------------------------------------------------------------------------------------------------------------------------------------------------------------------------------|
| 4/22        | 7.6391e-05 | <a href="#">GO:0032587</a> | ruffle membrane          | <a href="#">Aif1l</a> <a href="#">Epb4.1l5</a> <a href="#">Lcp1</a> <a href="#">Rasgrp2</a>                                                                                                                                                                                                                                                                                                                                                                                                                                                                                                                                                                                                                                                                                                                                                                                                                                                                                                                                                                                                                                                                                                                                                                                                                                                                                                                                                                                                                                                                                                                                                                                                                                                                                                      |
| 4/28        | 0.0002071  | <a href="#">GO:0005884</a> | actin filament           | <a href="#">Afap1</a> <a href="#">Aif1l</a> <a href="#">Gng12</a> <a href="#">Lcp1</a>                                                                                                                                                                                                                                                                                                                                                                                                                                                                                                                                                                                                                                                                                                                                                                                                                                                                                                                                                                                                                                                                                                                                                                                                                                                                                                                                                                                                                                                                                                                                                                                                                                                                                                           |
| 17/547      | 0.0004424  | <a href="#">GO:0030054</a> | cell junction            | <a href="#">Actn2</a> <a href="#">Cldn5</a> <a href="#">Cpeb1</a> <a href="#">Dsp</a> <a href="#">Epb4.1l5</a> <a href="#">Fermt3</a> <a href="#">Gjb3</a> <a href="#">Homer2</a> <a href="#">Lcp1</a> <a href="#">Lmo7</a> <a href="#">Pecam1</a> <a href="#">Rasgrp2</a> <a href="#">Rimbp2</a> <a href="#">Rims1</a> <a href="#">Sorbs1</a> <a href="#">Tes</a> <a href="#">Trim25</a>                                                                                                                                                                                                                                                                                                                                                                                                                                                                                                                                                                                                                                                                                                                                                                                                                                                                                                                                                                                                                                                                                                                                                                                                                                                                                                                                                                                                        |
| 7/147       | 0.0016306  | <a href="#">GO:0005912</a> | adherens junction        | <a href="#">Actn2</a> <a href="#">Dsp</a> <a href="#">Epb4.1l5</a> <a href="#">Lmo7</a> <a href="#">Sorbs1</a> <a href="#">Tes</a> <a href="#">Trim25</a>                                                                                                                                                                                                                                                                                                                                                                                                                                                                                                                                                                                                                                                                                                                                                                                                                                                                                                                                                                                                                                                                                                                                                                                                                                                                                                                                                                                                                                                                                                                                                                                                                                        |
| 6/118       | 0.0023882  | <a href="#">GO:0031253</a> | cell projection membrane | <a href="#">Aif1l</a> <a href="#">Atp8b1</a> <a href="#">Epb4.1l5</a> <a href="#">Lcp1</a> <a href="#">Pth1r</a> <a href="#">Rasgrp2</a>                                                                                                                                                                                                                                                                                                                                                                                                                                                                                                                                                                                                                                                                                                                                                                                                                                                                                                                                                                                                                                                                                                                                                                                                                                                                                                                                                                                                                                                                                                                                                                                                                                                         |
| 5/84        | 0.0025726  | <a href="#">GO:0005925</a> | focal adhesion           | <a href="#">Actn2</a> <a href="#">Epb4.1l5</a> <a href="#">Sorbs1</a> <a href="#">Tes</a> <a href="#">Trim25</a>                                                                                                                                                                                                                                                                                                                                                                                                                                                                                                                                                                                                                                                                                                                                                                                                                                                                                                                                                                                                                                                                                                                                                                                                                                                                                                                                                                                                                                                                                                                                                                                                                                                                                 |
| 95/5867     | 0.0064927  | <a href="#">GO:0016020</a> | membrane                 | <a href="#">4632428N05Rik</a> <a href="#">6030446N20Rik</a> <a href="#">Acpp</a> <a href="#">Agpat9</a> <a href="#">Aif1l</a> <a href="#">Aifm3</a> <a href="#">Ap3b2</a> <a href="#">Ap3m2</a> <a href="#">Atp8b1</a> <a href="#">Bcap29</a> <a href="#">Btbd11</a> <a href="#">Car12</a> <a href="#">Cd164l2</a> <a href="#">Cd276</a> <a href="#">Cerk</a> <a href="#">Chdh</a> <a href="#">Chpt1</a> <a href="#">Cldn5</a> <a href="#">Cpeb1</a> <a href="#">Cxcr4</a> <a href="#">Cyp1b1</a> <a href="#">Cyth3</a> <a href="#">Diras2</a> <a href="#">Dner</a> <a href="#">E130309F12Rik</a> <a href="#">Efna1</a> <a href="#">Enpp4</a> <a href="#">Epb4.1l5</a> <a href="#">Erbb3</a> <a href="#">Ero1l</a> <a href="#">Fam19a5</a> <a href="#">Fgfr2</a> <a href="#">Gab2</a> <a href="#">Gca</a> <a href="#">Gdpd1</a> <a href="#">Gjb3</a> <a href="#">Gng12</a> <a href="#">Gpr126</a> <a href="#">Gpr137b</a> <a href="#">Gstk1</a> <a href="#">H2-BI</a> <a href="#">Has3</a> <a href="#">Hk1</a> <a href="#">Homer2</a> <a href="#">Ier3</a> <a href="#">Immp2l</a> <a href="#">Itga1</a> <a href="#">Itgb3</a> <a href="#">Jakmip1</a> <a href="#">Kctd15</a> <a href="#">Kit</a> <a href="#">Lcp1</a> <a href="#">Ly6a</a> <a href="#">Marveld3</a> <a href="#">Mbp</a> <a href="#">Meg3</a> <a href="#">Mep1b</a> <a href="#">Mrs2</a> <a href="#">Ninj1</a> <a href="#">Npnt</a> <a href="#">Pecam1</a> <a href="#">Pla2g4e</a> <a href="#">Plcd1</a> <a href="#">Pnkd</a> <a href="#">Prkch</a> <a href="#">Ptgs2</a> <a href="#">Ptgs1</a> <a href="#">Pth1r</a> <a href="#">Ptpr</a> <a href="#">Rab6b</a> <a href="#">Rasgrp2</a> <a href="#">Rffl</a> <a href="#">Rgs16</a> <a href="#">Rimbp2</a> <a href="#">Rims1</a> <a href="#">Rnf182</a> <a href="#">S100a6...</a> |
| 25/1203     | 0.0092743  | <a href="#">GO:0044459</a> | plasma membrane part     | <a href="#">Aif1l</a> <a href="#">Atp8b1</a> <a href="#">Cd276</a> <a href="#">Dsp</a> <a href="#">Efna1</a> <a href="#">Enpp2</a> <a href="#">Epb4.1l5</a> <a href="#">Erbb3</a> <a href="#">Gjb3</a> <a href="#">Gng12</a> <a href="#">H2-BI</a> <a href="#">Hk1</a> <a href="#">Itga1</a> <a href="#">Itgb3</a> <a href="#">Kctd15</a> <a href="#">Kit</a> <a href="#">Lcp1</a> <a href="#">Lmo7</a> <a href="#">Ly6a</a> <a href="#">Pth1r</a> <a href="#">Rasgrp2</a> <a href="#">S100a6</a> <a href="#">Slc30a1</a> <a href="#">Slco4c1</a> <a href="#">Sorbs1</a>                                                                                                                                                                                                                                                                                                                                                                                                                                                                                                                                                                                                                                                                                                                                                                                                                                                                                                                                                                                                                                                                                                                                                                                                                         |
| 6/192       | 0.026694   | <a href="#">GO:0045121</a> | membrane raft            | <a href="#">Hk1</a> <a href="#">Itga1</a> <a href="#">Pecam1</a> <a href="#">Plcd1</a> <a href="#">Rgs16</a> <a href="#">Sorbs1</a>                                                                                                                                                                                                                                                                                                                                                                                                                                                                                                                                                                                                                                                                                                                                                                                                                                                                                                                                                                                                                                                                                                                                                                                                                                                                                                                                                                                                                                                                                                                                                                                                                                                              |
| 19/947      | 0.029137   | <a href="#">GO:0044430</a> | cytoskeletal part        | <a href="#">1190002H23Rik</a> <a href="#">Actn2</a> <a href="#">Afap1</a> <a href="#">Aif1l</a> <a href="#">Arpc1b</a> <a href="#">Aurkc</a> <a href="#">Cpeb1</a> <a href="#">Fermt3</a> <a href="#">Gng12</a> <a href="#">Homer2</a> <a href="#">Jakmip1</a> <a href="#">Kif3a</a> <a href="#">Lcp1</a> <a href="#">Pcgf5</a> <a href="#">Rassf5</a> <a href="#">Sept4</a> <a href="#">Sfi1</a> <a href="#">Sorbs1</a> <a href="#">Spnb3</a>                                                                                                                                                                                                                                                                                                                                                                                                                                                                                                                                                                                                                                                                                                                                                                                                                                                                                                                                                                                                                                                                                                                                                                                                                                                                                                                                                   |
| 38/2240     | 0.038426   | <a href="#">GO:0005886</a> | plasma membrane          | <a href="#">Aif1l</a> <a href="#">Cldn5</a> <a href="#">Cpeb1</a> <a href="#">Cxcr4</a> <a href="#">Cyth3</a> <a href="#">Diras2</a> <a href="#">Dner</a> <a href="#">Efna1</a> <a href="#">Epb4.1l5</a> <a href="#">Gab2</a> <a href="#">Gjb3</a> <a href="#">Gng12</a> <a href="#">Gpr126</a> <a href="#">H2-BI</a> <a href="#">Homer2</a> <a href="#">Lcp1</a> <a href="#">Ly6a</a> <a href="#">Mbp</a> <a href="#">Meg3</a> <a href="#">Pecam1</a> <a href="#">Prkch</a> <a href="#">Ptgs1</a> <a href="#">Pth1r</a> <a href="#">Ptpr</a> <a href="#">Rasgrp2</a> <a href="#">Rgs16</a> <a href="#">Rimbp2</a> <a href="#">Rims1</a> <a href="#">S100a6</a> <a href="#">Slc30a1</a> <a href="#">Slc38a4</a> <a href="#">Slc40a1</a> <a href="#">Slc5a5</a> <a href="#">Slco4c1</a> <a href="#">Slit2</a> <a href="#">Sorbs1</a> <a href="#">Tst</a> <a href="#">Ttyh2</a>                                                                                                                                                                                                                                                                                                                                                                                                                                                                                                                                                                                                                                                                                                                                                                                                                                                                                                                    |

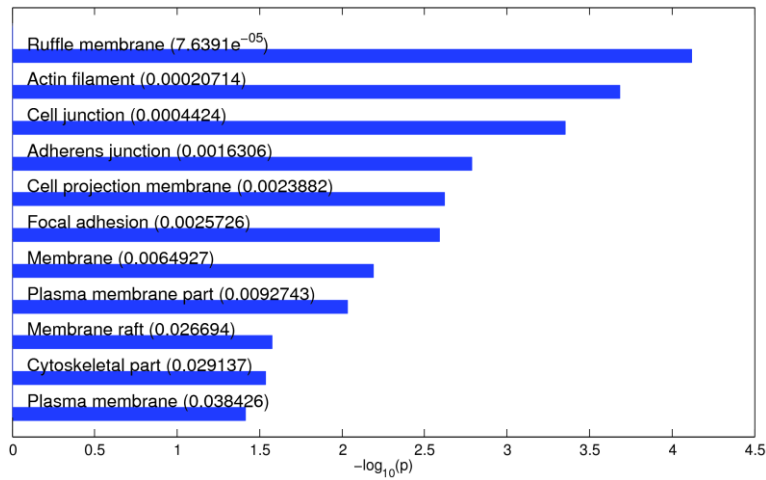

Figure : Plot bar of the  $-\log_{10}(p)$  of the significant enriched terms of Cellular-component-PGC KO-<-PGC CTRL-Log2(2.8284). The longer the bar, the higher is the statistical significance of the enrichment (in parenthesis are written the p-values)

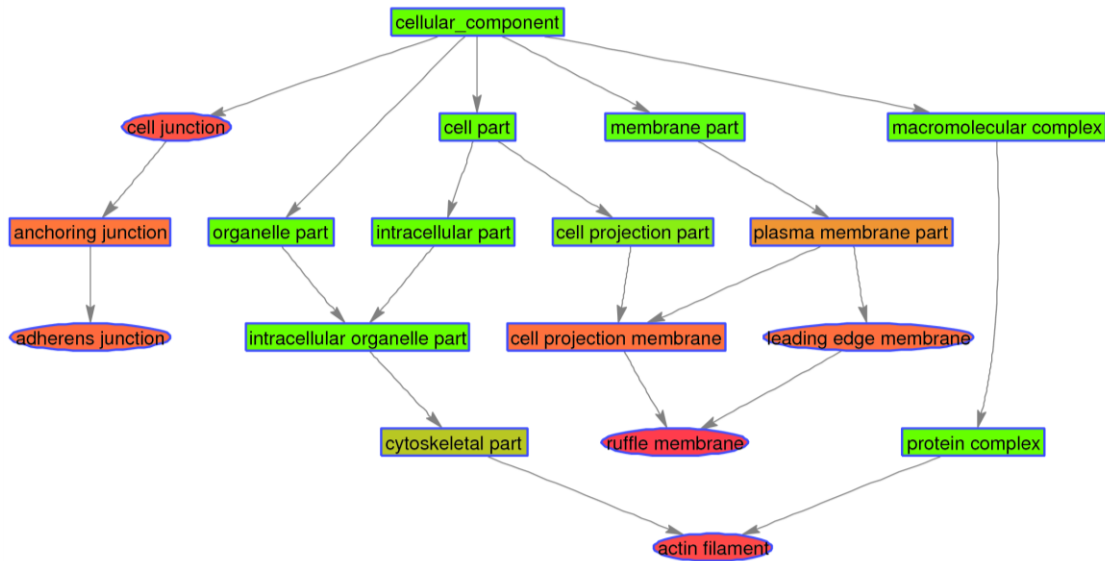

Figure : Direct acyclic graph (DAG) associated to the 5 top higher significant enriched gene ontology terms. The higher the significance of the term the more red is the box framing the term. The significant enriched terms are encircled by ellipses.

## 2.5 Disregulated (down- or up-regulated) in PGC KO in relation to PGC CTRL

Number of probes fulfilling the condition: 455. (These probes have already been listed in the previous heatmaps).

## 2.6 GO enrichment analysis of PGC KO-<-PGC CTRL-Log2(2.8284)

Number of probes in the signal set 455

Number of unique probes in the signal set 455

Number of probes in the background set 45101

Number of unique probes in the background set 21390



Table : GO terms of PGC KO-<->-PGC CTRL-Log2(2.8284)-molecular-function

| GO                         | Ter                              |
|----------------------------|----------------------------------|
| <a href="#">GO:0000166</a> | nucleotide binding (3.1%)        |
| <a href="#">GO:0003824</a> | catalytic activity (3.4%)        |
| <a href="#">GO:0017076</a> | purine nucleotide binding (8.5%) |
| <a href="#">GO:0005515</a> | protein binding (9.1%)           |
| <a href="#">GO:0005488</a> | binding (10%)                    |
| <a href="#">GO:0043167</a> | ion binding (12%)                |
| Others                     | Others (54%)                     |

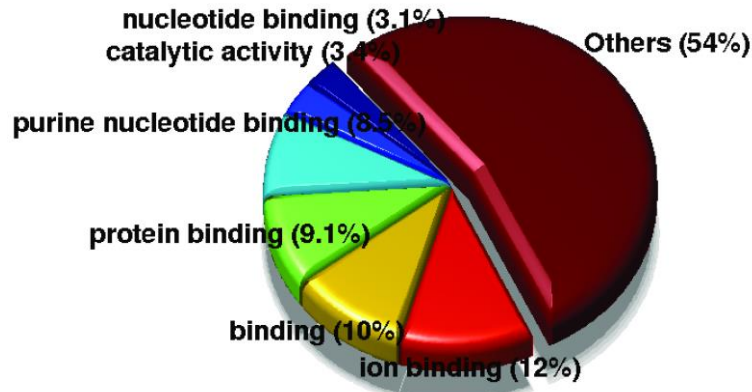

Figure 28: Pie graph of PGC KO-<->-PGC CTRL-Log2(2.8284)-molecular-function

Table : GO terms of PGC KO-<->-PGC CTRL-Log2(2.8284)-biological-process

| GO                         | Ter                                                  |
|----------------------------|------------------------------------------------------|
| <a href="#">GO:0050793</a> | regulation of developmental process (3.1%)           |
| <a href="#">GO:0006810</a> | transport (3.3%)                                     |
| <a href="#">GO:0050789</a> | regulation of biological process (3.3%)              |
| <a href="#">GO:0009889</a> | regulation of biosynthetic process (3.3%)            |
| <a href="#">GO:0060255</a> | regulation of macromolecule metabolic process (3.8%) |
| <a href="#">GO:0016043</a> | cellular component organization (3.8%)               |
| <a href="#">GO:0050896</a> | response to stimulus (4.8%)                          |
| <a href="#">GO:0032502</a> | developmental process (8.9%)                         |
| <a href="#">GO:0050794</a> | regulation of cellular process (9.6%)                |
| Others                     | Others (56%)                                         |

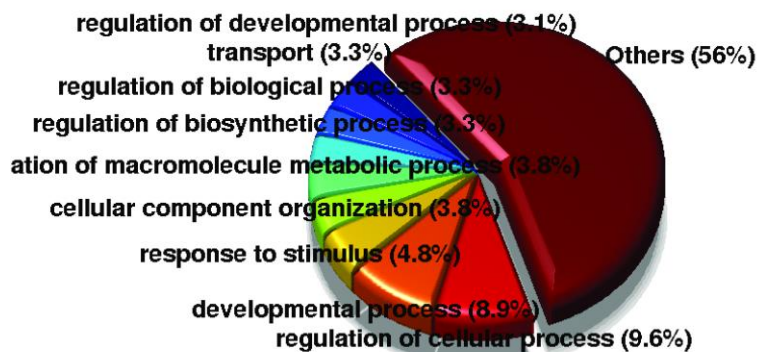

Figure 29: Pie graph of PGC KO-<->-PGC CTRL-Log2(2.8284)-biological-process

Table : GO terms of PGC KO-<->-PGC CTRL-Log2(2.8284)-cellular-component

| GO                         | Ter                                            |
|----------------------------|------------------------------------------------|
| <a href="#">GO:0044459</a> | plasma membrane part (3.2%)                    |
| <a href="#">GO:0044422</a> | organelle part (3.2%)                          |
| <a href="#">GO:0043234</a> | protein complex (3.7%)                         |
| <a href="#">GO:0044425</a> | membrane part (4.1%)                           |
| <a href="#">GO:0043227</a> | membrane-bounded organelle (4.9%)              |
| <a href="#">GO:0044444</a> | cytoplasmic part (5%)                          |
| <a href="#">GO:0043229</a> | intracellular organelle (5.7%)                 |
| <a href="#">GO:0043226</a> | organelle (5.7%)                               |
| <a href="#">GO:0031224</a> | intrinsic to membrane (6.3%)                   |
| <a href="#">GO:0016020</a> | membrane (7.4%)                                |
| <a href="#">GO:0043231</a> | intracellular membrane-bounded organelle (11%) |
| <a href="#">GO:0044424</a> | intracellular part (11%)                       |
| Others                     | Others (29%)                                   |

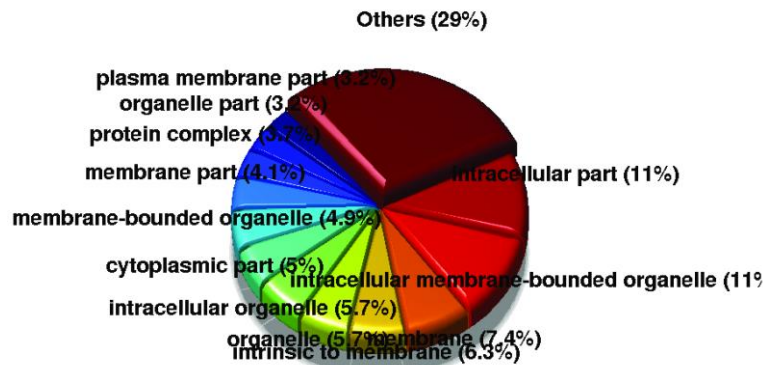

Figure 30: Pie graph of PGC KO-<->-PGC CTRL-Log2(2.8284)-cellular-component

### Molecular-function-PGC KO-<->-PGC CTRL-Log2(2.8284)

Table : Significant GO enrichment terms for Molecular-function-PGC KO-<->-PGC CTRL-Log2(2.8284)

| Count Ratio | p-val     | GO id                     | GO term                                            | Genes                                                                                                                                                                                                                                                                                                                                                                                                                                                                                                                                                                                                                                                                                                                                                                                                              |
|-------------|-----------|---------------------------|----------------------------------------------------|--------------------------------------------------------------------------------------------------------------------------------------------------------------------------------------------------------------------------------------------------------------------------------------------------------------------------------------------------------------------------------------------------------------------------------------------------------------------------------------------------------------------------------------------------------------------------------------------------------------------------------------------------------------------------------------------------------------------------------------------------------------------------------------------------------------------|
| 4/16        | 0.0004890 | <a href="#">GO:000408</a> | carbonate dehydratase activity                     | <a href="#">Car12</a> <a href="#">Car2</a> <a href="#">Car3</a> <a href="#">Car4</a>                                                                                                                                                                                                                                                                                                                                                                                                                                                                                                                                                                                                                                                                                                                               |
| 10/106      | 0.0005882 | <a href="#">GO:001712</a> | SH3 domain binding                                 | <a href="#">Afap1</a> <a href="#">Arhgap42</a> <a href="#">Dnajc6</a> <a href="#">Dock4</a> <a href="#">Dpysl3</a> <a href="#">Enah</a> <a href="#">Lrp2</a> <a href="#">Mical1</a> <a href="#">Rims1</a> <a href="#">Sh3bp5</a>                                                                                                                                                                                                                                                                                                                                                                                                                                                                                                                                                                                   |
| 26/458      | 0.0006216 | <a href="#">GO:001990</a> | protein domain specific binding                    | <a href="#">Actn2</a> <a href="#">Afap1</a> <a href="#">Akap2</a> <a href="#">Arhgap42</a> <a href="#">Bik</a> <a href="#">Ccdc88c</a> <a href="#">Cited2</a> <a href="#">Dmd</a> <a href="#">Dnajc6</a> <a href="#">Dock4</a> <a href="#">Dpysl3</a> <a href="#">Ebf1</a> <a href="#">Enah</a> <a href="#">Epb4.1l5</a> <a href="#">Gab2</a> <a href="#">Lnx1</a> <a href="#">Lrp2</a> <a href="#">Mbd2</a> <a href="#">Mical1</a> <a href="#">Ncam1</a> <a href="#">Nefl</a> <a href="#">Nr0b1</a> <a href="#">Pten</a> <a href="#">Rims1</a> <a href="#">Robo1</a> <a href="#">Sh3bp5</a>                                                                                                                                                                                                                       |
| 7/64        | 0.0014051 | <a href="#">GO:003067</a> | protein binding, bridging                          | <a href="#">Actn2</a> <a href="#">Actn3</a> <a href="#">Arhgap42</a> <a href="#">Dsp</a> <a href="#">Gab2</a> <a href="#">Grb10</a> <a href="#">Sorbs1</a>                                                                                                                                                                                                                                                                                                                                                                                                                                                                                                                                                                                                                                                         |
| 26/501      | 0.0022429 | <a href="#">GO:000809</a> | cytoskeletal protein binding                       | <a href="#">Actn2</a> <a href="#">Actn3</a> <a href="#">Afap1</a> <a href="#">Aif1l</a> <a href="#">Arhgap42</a> <a href="#">Arpc1b</a> <a href="#">Ccdc88c</a> <a href="#">Coro2b</a> <a href="#">Dmd</a> <a href="#">Enah</a> <a href="#">Epb4.1l5</a> <a href="#">Epb4.9</a> <a href="#">Fez1</a> <a href="#">Gli1</a> <a href="#">Homer2</a> <a href="#">Jakmip1</a> <a href="#">Kif1b</a> <a href="#">Lcp1</a> <a href="#">Lmo7</a> <a href="#">Mtap1b</a> <a href="#">Myo1f</a> <a href="#">Parvb</a> <a href="#">Psrc1</a> <a href="#">S100a6</a> <a href="#">Spnb3</a> <a href="#">Trim2</a>                                                                                                                                                                                                               |
| 6/54        | 0.0026586 | <a href="#">GO:000517</a> | integrin binding                                   | <a href="#">Ctgf</a> <a href="#">Dmd</a> <a href="#">Fermt3</a> <a href="#">Itga1</a> <a href="#">Itgb3</a> <a href="#">Npnt</a>                                                                                                                                                                                                                                                                                                                                                                                                                                                                                                                                                                                                                                                                                   |
| 36/774      | 0.0027753 | <a href="#">GO:000107</a> | nucleic acid binding transcription factor activity | <a href="#">Aff1</a> <a href="#">Cited2</a> <a href="#">Cphx</a> <a href="#">Csrnp3</a> <a href="#">Dmrt1</a> <a href="#">Ebf1</a> <a href="#">Epas1</a> <a href="#">Foxp1</a> <a href="#">Gata2</a> <a href="#">Gbx2</a> <a href="#">Gcm1</a> <a href="#">Gli1</a> <a href="#">Gli2</a> <a href="#">Glis3</a> <a href="#">Hey1</a> <a href="#">Hhex</a> <a href="#">Hoxa5</a> <a href="#">Id1</a> <a href="#">Klf12</a> <a href="#">Klf4</a> <a href="#">Lhx1</a> <a href="#">Mkx</a> <a href="#">Neurod1</a> <a href="#">Nr0b1</a> <a href="#">Nr3c1</a> <a href="#">Pou4f2</a> <a href="#">Rhox4a</a> <a href="#">Rhox5</a> <a href="#">Rhox6</a> <a href="#">Rhox9</a> <a href="#">Tcf7l2</a> <a href="#">Tcfap2c</a> <a href="#">Tqif2</a> <a href="#">Trps1</a> <a href="#">Zfxh3</a> <a href="#">Zfp423</a> |
| 4/25        | 0.0030518 | <a href="#">GO:000436</a> | glutathione transferase activity                   | <a href="#">Gstk1</a> <a href="#">Gstm1</a> <a href="#">Gstm3</a> <a href="#">Gstt2</a>                                                                                                                                                                                                                                                                                                                                                                                                                                                                                                                                                                                                                                                                                                                            |

|        |           |                           |                                                             |                                                                                                                                                                                                                                                                                                                                                                                                                                                                                                                                                                                                                                                                                                                                                                                   |
|--------|-----------|---------------------------|-------------------------------------------------------------|-----------------------------------------------------------------------------------------------------------------------------------------------------------------------------------------------------------------------------------------------------------------------------------------------------------------------------------------------------------------------------------------------------------------------------------------------------------------------------------------------------------------------------------------------------------------------------------------------------------------------------------------------------------------------------------------------------------------------------------------------------------------------------------|
| 8/98   | 0.0048095 | <a href="#">GO:001920</a> | kinase regulator activity                                   | <a href="#">1190002H23Rik</a> <a href="#">Camk2n1</a> <a href="#">Ccnd1</a> <a href="#">Efcab10</a> <a href="#">Erb3</a> <a href="#">Klf4</a> <a href="#">Sh3bp5</a> <a href="#">Spa17</a>                                                                                                                                                                                                                                                                                                                                                                                                                                                                                                                                                                                        |
| 20/375 | 0.0048607 | <a href="#">GO:001900</a> | guanyl nucleotide binding                                   | <a href="#">Ak4</a> <a href="#">Diras2</a> <a href="#">Dock4</a> <a href="#">Eras</a> <a href="#">Gbp2</a> <a href="#">Gbp3</a> <a href="#">Gch1</a> <a href="#">Mras</a> <a href="#">Prps1</a> <a href="#">Prps2</a> <a href="#">Rab31</a> <a href="#">Rab6b</a> <a href="#">Rnd3</a> <a href="#">Rtkn</a> <a href="#">Sept4</a> <a href="#">Tgtp1</a> <a href="#">Tubb2a</a> <a href="#">Tubb2a-ps2</a> <a href="#">Tubb2b</a> <a href="#">Urgcp</a>                                                                                                                                                                                                                                                                                                                            |
| 7/79   | 0.0050111 | <a href="#">GO:001988</a> | protein kinase regulator activity                           | <a href="#">1190002H23Rik</a> <a href="#">Camk2n1</a> <a href="#">Ccnd1</a> <a href="#">Efcab10</a> <a href="#">Erb3</a> <a href="#">Sh3bp5</a> <a href="#">Spa17</a>                                                                                                                                                                                                                                                                                                                                                                                                                                                                                                                                                                                                             |
| 5/44   | 0.0052111 | <a href="#">GO:001683</a> | hydro-lyase activity                                        | <a href="#">Car12</a> <a href="#">Car2</a> <a href="#">Car3</a> <a href="#">Car4</a> <a href="#">Ehhadh</a>                                                                                                                                                                                                                                                                                                                                                                                                                                                                                                                                                                                                                                                                       |
| 13/211 | 0.0061258 | <a href="#">GO:000368</a> | chromatin binding                                           | <a href="#">Chd7</a> <a href="#">Foxp1</a> <a href="#">Gli1</a> <a href="#">Gli2</a> <a href="#">Hhex</a> <a href="#">Hmgn5</a> <a href="#">Mbd2</a> <a href="#">Nr3c1</a> <a href="#">Phf21a</a> <a href="#">Pou4f2</a> <a href="#">Smarca1</a> <a href="#">Sox15</a> <a href="#">Trps1</a>                                                                                                                                                                                                                                                                                                                                                                                                                                                                                      |
| 4/32   | 0.007987  | <a href="#">GO:000460</a> | peroxidase activity                                         | <a href="#">Gpx7</a> <a href="#">Gstk1</a> <a href="#">Homer2</a> <a href="#">Ptgs1</a>                                                                                                                                                                                                                                                                                                                                                                                                                                                                                                                                                                                                                                                                                           |
| 19/367 | 0.0083003 | <a href="#">GO:003069</a> | GTPase regulator activity                                   | <a href="#">Arhgap42</a> <a href="#">Arhgap8</a> <a href="#">Bcar3</a> <a href="#">Cyth3</a> <a href="#">Dock4</a> <a href="#">Grtp1</a> <a href="#">Iqgap2</a> <a href="#">Mcf2</a> <a href="#">Nr1</a> <a href="#">Plice1</a> <a href="#">Rab3il1</a> <a href="#">Ralqds</a> <a href="#">Rasgrp2</a> <a href="#">Rgs16</a> <a href="#">Rgs19</a> <a href="#">Rtkn</a> <a href="#">Slit2</a> <a href="#">Srgap2</a> <a href="#">Tiam1</a>                                                                                                                                                                                                                                                                                                                                        |
| 5/49   | 0.0085522 | <a href="#">GO:001620</a> | antioxidant activity                                        | <a href="#">Gpx7</a> <a href="#">Gstk1</a> <a href="#">Homer2</a> <a href="#">Ptgs1</a> <a href="#">Srxn1</a>                                                                                                                                                                                                                                                                                                                                                                                                                                                                                                                                                                                                                                                                     |
| 26/564 | 0.011048  | <a href="#">GO:000550</a> | calcium ion binding                                         | <a href="#">Actn2</a> <a href="#">Actn3</a> <a href="#">Aif1l</a> <a href="#">Anxa4</a> <a href="#">Anxa8</a> <a href="#">Cdhr1</a> <a href="#">Dmd</a> <a href="#">Dner</a> <a href="#">Dtna</a> <a href="#">Efcab10</a> <a href="#">Gca</a> <a href="#">Gch1</a> <a href="#">Lcp1</a> <a href="#">Lrp2</a> <a href="#">Nid1</a> <a href="#">Notch4</a> <a href="#">Npnt</a> <a href="#">Pla2g1b</a> <a href="#">Plcd1</a> <a href="#">Plcd3</a> <a href="#">Plice1</a> <a href="#">Rasgrp2</a> <a href="#">S100a10</a> <a href="#">S100a6</a> <a href="#">Slit2</a> <a href="#">Sulf1</a>                                                                                                                                                                                       |
| 33/766 | 0.012841  | <a href="#">GO:003023</a> | enzyme regulator activity                                   | <a href="#">1190002H23Rik</a> <a href="#">Aifm3</a> <a href="#">Arhgap42</a> <a href="#">Arhgap8</a> <a href="#">Bcar3</a> <a href="#">Camk2n1</a> <a href="#">Ccnd1</a> <a href="#">Cyth3</a> <a href="#">Dnmt3l</a> <a href="#">Dock4</a> <a href="#">Efcab10</a> <a href="#">Erb3</a> <a href="#">Grtp1</a> <a href="#">Iqgap2</a> <a href="#">Klf4</a> <a href="#">Mcf2</a> <a href="#">Nr1</a> <a href="#">Plice1</a> <a href="#">Rab3il1</a> <a href="#">Ralqds</a> <a href="#">Rasgrp2</a> <a href="#">Rgs16</a> <a href="#">Rgs19</a> <a href="#">Rtkn</a> <a href="#">Serpib6c</a> <a href="#">Serpine2</a> <a href="#">Sfrp2</a> <a href="#">Sh3bp5</a> <a href="#">Slit2</a> <a href="#">Spa17</a> <a href="#">Spink3</a> <a href="#">Srgap2</a> <a href="#">Tiam1</a> |
| 19/400 | 0.020036  | <a href="#">GO:003052</a> | transcription regulator activity                            | <a href="#">Cited2</a> <a href="#">Ebf1</a> <a href="#">Epas1</a> <a href="#">Gata2</a> <a href="#">Gbx2</a> <a href="#">Hey1</a> <a href="#">Hhex</a> <a href="#">Hoxa5</a> <a href="#">Id1</a> <a href="#">Klf9</a> <a href="#">Lhx1</a> <a href="#">Mkx</a> <a href="#">Neurod1</a> <a href="#">Nr3c1</a> <a href="#">Pou4f2</a> <a href="#">Smarca1</a> <a href="#">Sox15</a> <a href="#">Tcf15</a> <a href="#">Zfx3</a>                                                                                                                                                                                                                                                                                                                                                      |
| 19/401 | 0.020636  | <a href="#">GO:004280</a> | protein homodimerization activity                           | <a href="#">Actn2</a> <a href="#">Actn3</a> <a href="#">Ccbl1</a> <a href="#">Foxp1</a> <a href="#">Gca</a> <a href="#">Gstm1</a> <a href="#">Hhex</a> <a href="#">Hk1</a> <a href="#">Inhbb</a> <a href="#">Irak3</a> <a href="#">Nr0b1</a> <a href="#">Nr3c1</a> <a href="#">Prps1</a> <a href="#">Prps2</a> <a href="#">Ptprc</a> <a href="#">Pygl</a> <a href="#">S100a6</a> <a href="#">Slit2</a> <a href="#">Zfp423</a>                                                                                                                                                                                                                                                                                                                                                     |
| 25/569 | 0.02219   | <a href="#">GO:004356</a> | sequence-specific DNA binding                               | <a href="#">Cphx</a> <a href="#">Epas1</a> <a href="#">Foxp1</a> <a href="#">Gata2</a> <a href="#">Gbx2</a> <a href="#">Gli2</a> <a href="#">Hhex</a> <a href="#">Hoxa5</a> <a href="#">Klf4</a> <a href="#">Lhx1</a> <a href="#">Mbd2</a> <a href="#">Mkx</a> <a href="#">Neurod1</a> <a href="#">Nr0b1</a> <a href="#">Nr3c1</a> <a href="#">Pou4f2</a> <a href="#">Rhox4a</a> <a href="#">Rhox5</a> <a href="#">Rhox6</a> <a href="#">Rhox9</a> <a href="#">Tcf7l2</a> <a href="#">Tgif2</a> <a href="#">Trps1</a> <a href="#">Zfx3</a> <a href="#">Zfp423</a>                                                                                                                                                                                                                 |
| 5/61   | 0.022337  | <a href="#">GO:000471</a> | transmembrane receptor protein tyrosine kinase activity     | <a href="#">Epha2</a> <a href="#">Erb3</a> <a href="#">Fgfr2</a> <a href="#">Kit</a> <a href="#">Tek</a>                                                                                                                                                                                                                                                                                                                                                                                                                                                                                                                                                                                                                                                                          |
| 6/82   | 0.023163  | <a href="#">GO:001629</a> | lipase activity                                             | <a href="#">Abhd5</a> <a href="#">Pla2g1b</a> <a href="#">Pla2g4e</a> <a href="#">Plcd1</a> <a href="#">Plcd3</a> <a href="#">Plice1</a>                                                                                                                                                                                                                                                                                                                                                                                                                                                                                                                                                                                                                                          |
| 9/150  | 0.023931  | <a href="#">GO:000508</a> | guanyl-nucleotide exchange factor activity                  | <a href="#">Bcar3</a> <a href="#">Cyth3</a> <a href="#">Dock4</a> <a href="#">Mcf2</a> <a href="#">Plice1</a> <a href="#">Rab3il1</a> <a href="#">Ralqds</a> <a href="#">Rasgrp2</a> <a href="#">Tiam1</a>                                                                                                                                                                                                                                                                                                                                                                                                                                                                                                                                                                        |
| 4/43   | 0.024769  | <a href="#">GO:001666</a> | oxidoreductase activity, acting on a sulfur group of donors | <a href="#">Ero1l</a> <a href="#">Gstk1</a> <a href="#">Ptgs2</a> <a href="#">Srxn1</a>                                                                                                                                                                                                                                                                                                                                                                                                                                                                                                                                                                                                                                                                                           |
| 9/151  | 0.025201  | <a href="#">GO:000187</a> | pattern binding                                             | <a href="#">Crispld2</a> <a href="#">Ctgf</a> <a href="#">Dpysl3</a> <a href="#">Enpp2</a> <a href="#">Fgfr2</a> <a href="#">Habp4</a> <a href="#">Ncam1</a> <a href="#">Serpine2</a> <a href="#">Slit2</a>                                                                                                                                                                                                                                                                                                                                                                                                                                                                                                                                                                       |
| 8/131  | 0.029348  | <a href="#">GO:000553</a> | glycosaminoglycan binding                                   | <a href="#">Crispld2</a> <a href="#">Ctgf</a> <a href="#">Dpysl3</a> <a href="#">Fgfr2</a> <a href="#">Habp4</a> <a href="#">Ncam1</a> <a href="#">Serpine2</a> <a href="#">Slit2</a>                                                                                                                                                                                                                                                                                                                                                                                                                                                                                                                                                                                             |
| 5/65   | 0.030036  | <a href="#">GO:001517</a> | amino acid transmembrane transporter activity               | <a href="#">Slc38a4</a> <a href="#">Slc6a8</a> <a href="#">Slc7a3</a> <a href="#">Slc7a9</a> <a href="#">Slco4a1</a>                                                                                                                                                                                                                                                                                                                                                                                                                                                                                                                                                                                                                                                              |
| 15/310 | 0.032248  | <a href="#">GO:000377</a> | actin binding                                               | <a href="#">Actn2</a> <a href="#">Actn3</a> <a href="#">Afap1</a> <a href="#">Aif1l</a> <a href="#">Arpc1b</a> <a href="#">Coro2b</a> <a href="#">Dmd</a> <a href="#">Enah</a> <a href="#">Epb4.9</a> <a href="#">Homer2</a> <a href="#">Lcp1</a> <a href="#">Mtap1b</a> <a href="#">Myo1f</a> <a href="#">Parvb</a> <a href="#">Spnb3</a>                                                                                                                                                                                                                                                                                                                                                                                                                                        |
| 5/68   | 0.036242  | <a href="#">GO:000462</a> | phospholipase activity                                      | <a href="#">Pla2g1b</a> <a href="#">Pla2g4e</a> <a href="#">Plcd1</a> <a href="#">Plcd3</a> <a href="#">Plice1</a>                                                                                                                                                                                                                                                                                                                                                                                                                                                                                                                                                                                                                                                                |
| 12/237 | 0.038024  | <a href="#">GO:003024</a> | carbohydrate binding                                        | <a href="#">Crispld2</a> <a href="#">Ctgf</a> <a href="#">Dpysl3</a> <a href="#">Enpp2</a> <a href="#">Fgfr2</a> <a href="#">Galk1</a> <a href="#">Habp4</a> <a href="#">Hk1</a> <a href="#">Ncam1</a> <a href="#">Serpine2</a> <a href="#">Siglec5</a> <a href="#">Slit2</a>                                                                                                                                                                                                                                                                                                                                                                                                                                                                                                     |
| 26/634 | 0.045395  | <a href="#">GO:004698</a> | protein dimerization activity                               | <a href="#">Actn2</a> <a href="#">Actn3</a> <a href="#">Bik</a> <a href="#">Ccbl1</a> <a href="#">Epas1</a> <a href="#">Erb3</a> <a href="#">Foxp1</a> <a href="#">Gca</a> <a href="#">Gstm1</a> <a href="#">Hhex</a> <a href="#">Hk1</a> <a href="#">Inhbb</a> <a href="#">Irak3</a> <a href="#">Itga1</a> <a href="#">Neurod1</a> <a href="#">Nr0b1</a> <a href="#">Nr3c1</a> <a href="#">Prps1</a> <a href="#">Prps2</a> <a href="#">Ptprc</a> <a href="#">Pygl</a> <a href="#">Robo1</a> <a href="#">S100a6</a> <a href="#">Slit2</a> <a href="#">Tcfap2c</a> <a href="#">Zfp423</a>                                                                                                                                                                                          |

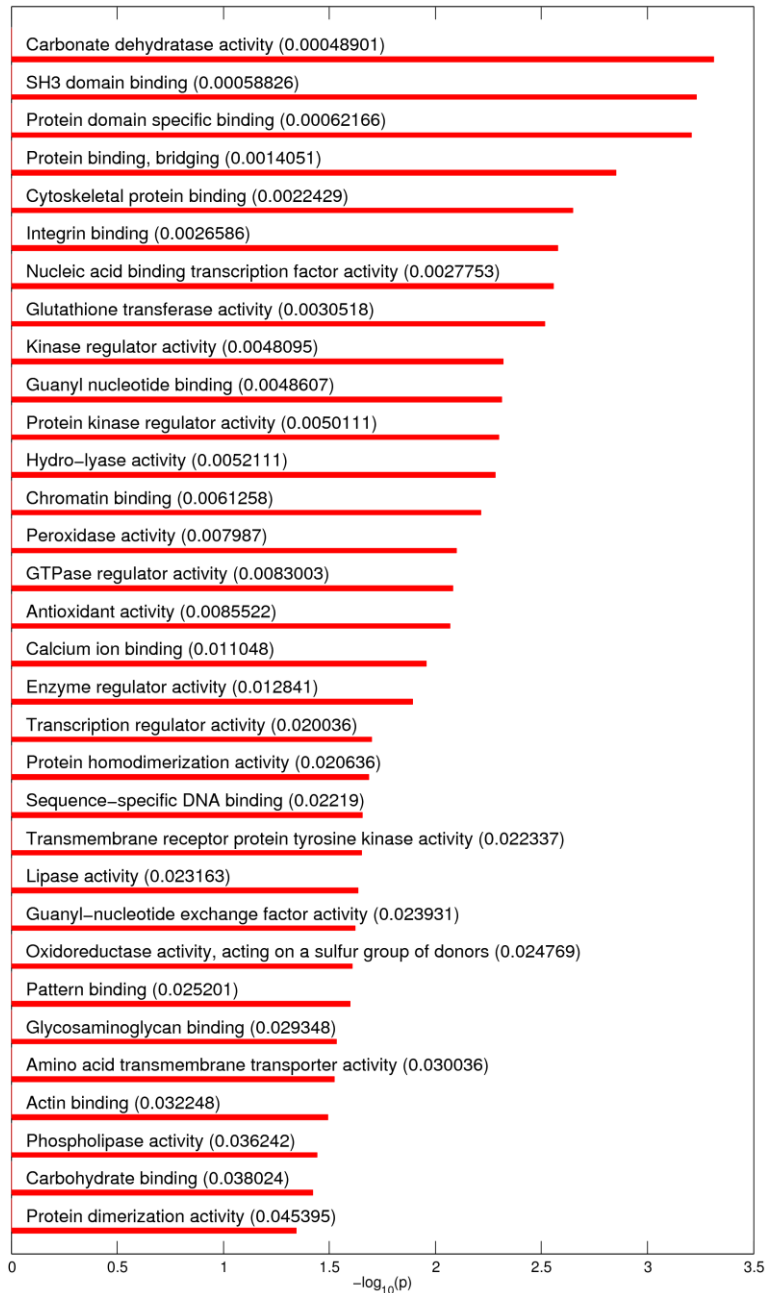

Figure 31: Plot bar of the  $-\log_{10}(p)$  of the significant enriched terms of Molecular-function-PGC KO-<->-PGC CTRL-Log2(2.8284). The longer the bar, the higher is the statistical significance of the enrichment (in parenthesis are written the p-values)

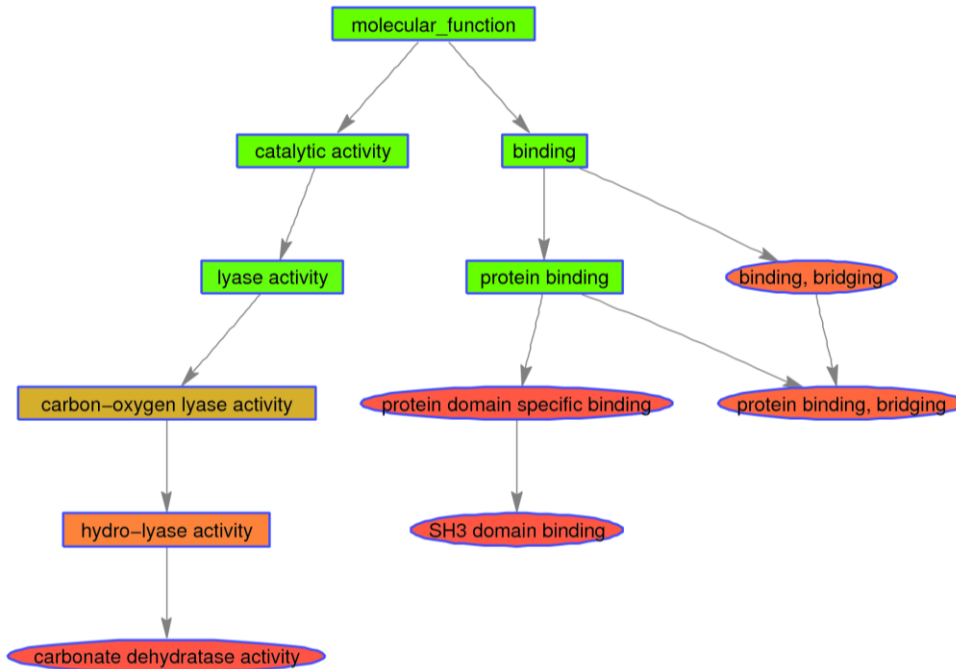

Figure 32: Direct acyclic graph (DAG) associated to the 5 top higher significant enriched gene ontology terms. The higher the significance of the term the more red is the box framing the term. The significant enriched terms are encircled by ellipses.

### Biological-process-PGC KO-<->-PGC CTRL-Log2(2.8284)

Table : Significant GO enrichment terms for Biological-process-PGC KO-<->-PGC CTRL-Log2(2.8284)

| Count Ratio | p-val                  | GO id                      | GO term                                | Genes                                                                                                                                                                                                                                                                                                                                                                                                                                                                                                                                                                                                                                                                                                                                                                                                                                                                                                                                                                                                                                                                                                                                                                                                                                                                                                                                                                                                                                                                                                                                                                                                                                                                                                                                                           |
|-------------|------------------------|----------------------------|----------------------------------------|-----------------------------------------------------------------------------------------------------------------------------------------------------------------------------------------------------------------------------------------------------------------------------------------------------------------------------------------------------------------------------------------------------------------------------------------------------------------------------------------------------------------------------------------------------------------------------------------------------------------------------------------------------------------------------------------------------------------------------------------------------------------------------------------------------------------------------------------------------------------------------------------------------------------------------------------------------------------------------------------------------------------------------------------------------------------------------------------------------------------------------------------------------------------------------------------------------------------------------------------------------------------------------------------------------------------------------------------------------------------------------------------------------------------------------------------------------------------------------------------------------------------------------------------------------------------------------------------------------------------------------------------------------------------------------------------------------------------------------------------------------------------|
| 18/196<br>5 | 4.3137e <sup>-05</sup> | <a href="#">GO:0002009</a> | morphogenesis of an epithelium         | <a href="#">Car2</a> <a href="#">Cited2</a> <a href="#">Cxcr4</a> <a href="#">Epb4.115</a> <a href="#">Fgfr2</a> <a href="#">Gbx2</a> <a href="#">Gcm1</a> <a href="#">Gli2</a> <a href="#">Hhex</a> <a href="#">Hoxa5</a> <a href="#">Lama1</a> <a href="#">Notch4</a> <a href="#">Npnt</a> <a href="#">Nr3c1</a> <a href="#">Sfrp1</a> <a href="#">Sfrp2</a> <a href="#">Slit2</a> <a href="#">Vegfc</a>                                                                                                                                                                                                                                                                                                                                                                                                                                                                                                                                                                                                                                                                                                                                                                                                                                                                                                                                                                                                                                                                                                                                                                                                                                                                                                                                                      |
| 47/817<br>5 | 8.0174e <sup>-05</sup> | <a href="#">GO:0048513</a> | organ development                      | <a href="#">Anxa4</a> <a href="#">Bik</a> <a href="#">Car2</a> <a href="#">Car4</a> <a href="#">Ccnd1</a> <a href="#">Cdk6</a> <a href="#">Chd7</a> <a href="#">Cited2</a> <a href="#">Ckb</a> <a href="#">Crip2</a> <a href="#">Ctgf</a> <a href="#">Cxcr4</a> <a href="#">Dmd</a> <a href="#">Epas1</a> <a href="#">Erbb3</a> <a href="#">Fgf15</a> <a href="#">Fgfr2</a> <a href="#">Foxp1</a> <a href="#">Gata2</a> <a href="#">Gjb3</a> <a href="#">Gli1</a> <a href="#">Gli2</a> <a href="#">Hhex</a> <a href="#">Hoxa5</a> <a href="#">Id1</a> <a href="#">Inhbb</a> <a href="#">Kif3a</a> <a href="#">Kit</a> <a href="#">Klf4</a> <a href="#">Lhx1</a> <a href="#">Lmna</a> <a href="#">Mkx</a> <a href="#">Neurod1</a> <a href="#">Notch4</a> <a href="#">Nr0b1</a> <a href="#">Nr3c1</a> <a href="#">Plcd1</a> <a href="#">Plcd3</a> <a href="#">Pten</a> <a href="#">Sept4</a> <a href="#">Sfrp1</a> <a href="#">Sfrp2</a> <a href="#">Slit2</a> <a href="#">Smarca1</a> <a href="#">Tek</a> <a href="#">Trps1</a> <a href="#">Zfhx3</a>                                                                                                                                                                                                                                                                                                                                                                                                                                                                                                                                                                                                                                                                                                            |
| 62/119<br>6 | 0.00014464             | <a href="#">GO:0030154</a> | cell differentiation                   | <a href="#">Abhd5</a> <a href="#">Bcl11a</a> <a href="#">Ccnd1</a> <a href="#">Cdk6</a> <a href="#">Chd7</a> <a href="#">Cited2</a> <a href="#">Ctgf</a> <a href="#">Dmrt1</a> <a href="#">Dner</a> <a href="#">Dsp</a> <a href="#">Efn1</a> <a href="#">Enah</a> <a href="#">Epas1</a> <a href="#">Epha2</a> <a href="#">Erbb3</a> <a href="#">Ero1l</a> <a href="#">Fgf4</a> <a href="#">Fgfr2</a> <a href="#">Foxp1</a> <a href="#">Gab2</a> <a href="#">Gabbr1</a> <a href="#">Gata2</a> <a href="#">Gcm1</a> <a href="#">Gli1</a> <a href="#">Gli2</a> <a href="#">Hey1</a> <a href="#">Hhex</a> <a href="#">Hoxa5</a> <a href="#">Inhbb</a> <a href="#">Kit</a> <a href="#">Klf4</a> <a href="#">Lama1</a> <a href="#">Lhx1</a> <a href="#">Ndr2</a> <a href="#">Neurod1</a> <a href="#">Notch4</a> <a href="#">Npnt</a> <a href="#">Nr0b1</a> <a href="#">Paqr8</a> <a href="#">Pou4f2</a> <a href="#">Ptgs1</a> <a href="#">Pth1r</a> <a href="#">Robo1</a> <a href="#">Sema4a</a> <a href="#">Serpine2</a> <a href="#">Sfrp1</a> <a href="#">Sfrp2</a> <a href="#">Slco4c1</a> <a href="#">Slit2</a> <a href="#">Smarca1</a> <a href="#">Sox15</a> <a href="#">Spp1</a> <a href="#">Tcf7l2</a> <a href="#">Tcfap2c</a> <a href="#">Tubb2a</a> <a href="#">Tubb2a-ps2</a> <a href="#">Tubb2b</a> <a href="#">Vegfc</a> <a href="#">Zfp361l</a> <a href="#">Zfp423</a> <a href="#">Zic2</a> <a href="#">Zic5</a>                                                                                                                                                                                                                                                                                                                                         |
| 77/158<br>4 | 0.00020161             | <a href="#">GO:0048869</a> | cellular developmental process         | <a href="#">Abcb1b</a> <a href="#">Abhd5</a> <a href="#">Bcl11a</a> <a href="#">Calca</a> <a href="#">Ccnd1</a> <a href="#">Cdk6</a> <a href="#">Chd7</a> <a href="#">Cited2</a> <a href="#">Ctgf</a> <a href="#">Cxcr4</a> <a href="#">Dmd</a> <a href="#">Dmrt1</a> <a href="#">Dner</a> <a href="#">Dsp</a> <a href="#">Efn1</a> <a href="#">Enah</a> <a href="#">Epas1</a> <a href="#">Epb4.115</a> <a href="#">Epha2</a> <a href="#">Erbb3</a> <a href="#">Ero1l</a> <a href="#">Fgf4</a> <a href="#">Fgfr2</a> <a href="#">Foxp1</a> <a href="#">Gab2</a> <a href="#">Gabbr1</a> <a href="#">Gata2</a> <a href="#">Gcm1</a> <a href="#">Gli1</a> <a href="#">Gli2</a> <a href="#">Hey1</a> <a href="#">Hhex</a> <a href="#">Hoxa5</a> <a href="#">Id1</a> <a href="#">Inhbb</a> <a href="#">Itga1</a> <a href="#">Kif3a</a> <a href="#">Kit</a> <a href="#">Klf4</a> <a href="#">Lama1</a> <a href="#">Lhx1</a> <a href="#">Lmna</a> <a href="#">Msi2</a> <a href="#">Mtap1b</a> <a href="#">Ncam1</a> <a href="#">Ndr2</a> <a href="#">Nefl</a> <a href="#">Neurod1</a> <a href="#">Notch4</a> <a href="#">Npnt</a> <a href="#">Nr0b1</a> <a href="#">Paqr8</a> <a href="#">Pou4f2</a> <a href="#">Ptgs1</a> <a href="#">Pth1r</a> <a href="#">Rhox5</a> <a href="#">Robo1</a> <a href="#">Sema4a</a> <a href="#">Sept4</a> <a href="#">Serpine2</a> <a href="#">Sfrp1</a> <a href="#">Sfrp2</a> <a href="#">Slco4c1</a> <a href="#">Slit2</a> <a href="#">Smarca1</a> <a href="#">Sox15</a> <a href="#">Spp1</a> <a href="#">Tcf7l2</a> <a href="#">Tcfap2c</a> <a href="#">Tubb2a</a> <a href="#">Tubb2a-ps2</a> <a href="#">Tubb2b</a> <a href="#">Vegfc</a> <a href="#">Zfp361l</a> <a href="#">Zfp423</a> <a href="#">Zic2</a> <a href="#">Zic5</a> |
| 14/149      | 0.00021012             | <a href="#">GO:0001763</a> | morphogenesis of a branching structure | <a href="#">Cited2</a> <a href="#">Cxcr4</a> <a href="#">Fgfr2</a> <a href="#">Gbx2</a> <a href="#">Gcm1</a> <a href="#">Gli2</a> <a href="#">Hhex</a> <a href="#">Hoxa5</a> <a href="#">Lama1</a> <a href="#">Notch4</a> <a href="#">Npnt</a> <a href="#">Sfrp1</a> <a href="#">Sfrp2</a> <a href="#">Slit2</a>                                                                                                                                                                                                                                                                                                                                                                                                                                                                                                                                                                                                                                                                                                                                                                                                                                                                                                                                                                                                                                                                                                                                                                                                                                                                                                                                                                                                                                                |
| 15/168      | 0.0002309              | <a href="#">GO:0030155</a> | regulation of cell adhesion            | <a href="#">Calca</a> <a href="#">Cdk6</a> <a href="#">Cited2</a> <a href="#">Cyth3</a> <a href="#">Epb4.115</a> <a href="#">Erbb3</a> <a href="#">Fermt3</a> <a href="#">Lama1</a>                                                                                                                                                                                                                                                                                                                                                                                                                                                                                                                                                                                                                                                                                                                                                                                                                                                                                                                                                                                                                                                                                                                                                                                                                                                                                                                                                                                                                                                                                                                                                                             |

|        |            |                            |                                                           |                                                                                                                                                                                                                                                                                                                                                                                                                                                                                                                                                                                                                                                                                                                                                                                                                                                                                                                                                                                                                                                                                                                                                                                                                                                                                                                                                                                                                                                                                                                                                                                                                                                                                                                                                                                                                                                                                          |
|--------|------------|----------------------------|-----------------------------------------------------------|------------------------------------------------------------------------------------------------------------------------------------------------------------------------------------------------------------------------------------------------------------------------------------------------------------------------------------------------------------------------------------------------------------------------------------------------------------------------------------------------------------------------------------------------------------------------------------------------------------------------------------------------------------------------------------------------------------------------------------------------------------------------------------------------------------------------------------------------------------------------------------------------------------------------------------------------------------------------------------------------------------------------------------------------------------------------------------------------------------------------------------------------------------------------------------------------------------------------------------------------------------------------------------------------------------------------------------------------------------------------------------------------------------------------------------------------------------------------------------------------------------------------------------------------------------------------------------------------------------------------------------------------------------------------------------------------------------------------------------------------------------------------------------------------------------------------------------------------------------------------------------------|
| 6/33   | 0.00031546 | <a href="#">GO:0060562</a> | epithelial tube morphogenesis                             | <a href="#">Myo1f</a> <a href="#">Nid1</a> <a href="#">Npnt</a> <a href="#">Pten</a> <a href="#">Serpine2</a> <a href="#">Spp1</a> <a href="#">Tek</a> <a href="#">Gli2</a> <a href="#">Hhex</a> <a href="#">Hoxa5</a> <a href="#">Lama1</a> <a href="#">Nr3c1</a> <a href="#">Slit2</a>                                                                                                                                                                                                                                                                                                                                                                                                                                                                                                                                                                                                                                                                                                                                                                                                                                                                                                                                                                                                                                                                                                                                                                                                                                                                                                                                                                                                                                                                                                                                                                                                 |
| 50/955 | 0.00045668 | <a href="#">GO:0009966</a> | regulation of signal transduction                         | <a href="#">Afap1</a> <a href="#">Aqpat9</a> <a href="#">Ccnd1</a> <a href="#">Ceacam1</a> <a href="#">Cited2</a> <a href="#">Cyth3</a> <a href="#">Ddit4l</a> <a href="#">Efna1</a> <a href="#">Erbb3</a> <a href="#">Fgf15</a> <a href="#">Fgf4</a> <a href="#">Fgfbp1</a> <a href="#">Fgfr2</a> <a href="#">Gli2</a> <a href="#">Grb10</a> <a href="#">Hey1</a> <a href="#">Hhex</a> <a href="#">Id1</a> <a href="#">Iqgap2</a> <a href="#">Irak3</a> <a href="#">Itga1</a> <a href="#">Itgb3</a> <a href="#">Kit</a> <a href="#">Klf4</a> <a href="#">Mbd2</a> <a href="#">Mcf2</a> <a href="#">Ncam1</a> <a href="#">Npnt</a> <a href="#">Nr0b1</a> <a href="#">Nr3c1</a> <a href="#">Plce1</a> <a href="#">Plk2</a> <a href="#">Pten</a> <a href="#">Ptpre</a> <a href="#">Ralgds</a> <a href="#">Rasgrp2</a> <a href="#">Rgs16</a> <a href="#">Rgs19</a> <a href="#">Robo1</a> <a href="#">Serpine2</a> <a href="#">Sfrp1</a> <a href="#">Sfrp2</a> <a href="#">Slc7a3</a> <a href="#">Slit2</a> <a href="#">Spred1</a> <a href="#">Tcf7l2</a> <a href="#">Tek</a> <a href="#">Tiam1</a> <a href="#">Tob1</a> <a href="#">Vegfc</a> <a href="#">Ccnd1</a> <a href="#">Ctgf</a> <a href="#">Nefl</a> <a href="#">Ptgs1</a> <a href="#">Trh</a>                                                                                                                                                                                                                                                                                                                                                                                                                                                                                                                                                                                                                                     |
| 5/24   | 0.0004717  | <a href="#">GO:0051385</a> | response to mineralocorticoid stimulus                    | <a href="#">Cited2</a> <a href="#">Cxcr4</a> <a href="#">Fgfr2</a> <a href="#">Gbx2</a> <a href="#">Gcm1</a> <a href="#">Hhex</a> <a href="#">Hoxa5</a> <a href="#">Lama1</a> <a href="#">Notch4</a> <a href="#">Npnt</a> <a href="#">Sfrp1</a> <a href="#">Sfrp2</a>                                                                                                                                                                                                                                                                                                                                                                                                                                                                                                                                                                                                                                                                                                                                                                                                                                                                                                                                                                                                                                                                                                                                                                                                                                                                                                                                                                                                                                                                                                                                                                                                                    |
| 12/126 | 0.00048434 | <a href="#">GO:0061138</a> | morphogenesis of a branching epithelium                   | <a href="#">Abcb1b</a> <a href="#">Anxa4</a> <a href="#">Bik</a> <a href="#">Car2</a> <a href="#">Car4</a> <a href="#">Ccnd1</a> <a href="#">Cdk6</a> <a href="#">Chd7</a> <a href="#">Cited2</a> <a href="#">Ckb</a> <a href="#">Crip2</a> <a href="#">Ctgf</a> <a href="#">Cxcr4</a> <a href="#">Dmd</a> <a href="#">Dner</a> <a href="#">Dnmt3l</a> <a href="#">Dpysl3</a> <a href="#">Dsp</a> <a href="#">E130309F12Rik</a> <a href="#">Enah</a> <a href="#">Epas1</a> <a href="#">Epb4.115</a> <a href="#">Epha2</a> <a href="#">Erbb3</a> <a href="#">Fgf15</a> <a href="#">Fgfr2</a> <a href="#">Foxp1</a> <a href="#">Gata2</a> <a href="#">Gbx2</a> <a href="#">Gjb3</a> <a href="#">Gli1</a> <a href="#">Gli2</a> <a href="#">Gng12</a> <a href="#">Hhex</a> <a href="#">Hoxa5</a> <a href="#">Id1</a> <a href="#">Inhbb</a> <a href="#">Kif1b</a> <a href="#">Kif3a</a> <a href="#">Kit</a> <a href="#">Klf4</a> <a href="#">Lama1</a> <a href="#">Lhx1</a> <a href="#">Lmna</a> <a href="#">Lrp2</a> <a href="#">Mcf2</a> <a href="#">Mkx</a> <a href="#">Msi2</a> <a href="#">Mtap1b</a> <a href="#">Ncam1</a> <a href="#">Ndrq2</a> <a href="#">Neurod1</a> <a href="#">Ninj1</a> <a href="#">Notch4</a> <a href="#">Npnt</a> <a href="#">Nr0b1</a> <a href="#">Nr3c1</a> <a href="#">Plcd1</a> <a href="#">Plcd3</a> <a href="#">Plce1</a> <a href="#">Pou4f2</a> <a href="#">Prps1</a> <a href="#">Pten</a> <a href="#">Pth1r</a> <a href="#">Robo1</a> <a href="#">Sema4a</a> <a href="#">Sept4</a> <a href="#">Serpine2</a> <a href="#">Sfrp1</a> <a href="#">Sfrp2</a> <a href="#">Slc30a1</a> <a href="#">Slit2</a> <a href="#">Smarca1</a> <a href="#">Sox15</a> <a href="#">Spp1</a> <a href="#">Tcf7l2</a> <a href="#">Tek</a> <a href="#">Tgif2</a> <a href="#">Trps1</a> <a href="#">Zfhx3</a> <a href="#">Zfp423</a> <a href="#">Zic2</a> <a href="#">Zic5</a> |
| 83/179 | 0.00059484 | <a href="#">GO:0048856</a> | anatomical structure development                          | <a href="#">Adamts9</a> <a href="#">Car2</a> <a href="#">Ccnd1</a> <a href="#">Cd276</a> <a href="#">Cdk6</a> <a href="#">Dpysl3</a> <a href="#">Efna1</a> <a href="#">Epb4.115</a> <a href="#">Fez1</a> <a href="#">Fgf4</a> <a href="#">Fgfr2</a> <a href="#">Gli2</a> <a href="#">Hoxa5</a> <a href="#">Itgb3</a> <a href="#">Kit</a> <a href="#">Klf4</a> <a href="#">Mbp</a> <a href="#">Mtap1b</a> <a href="#">Nefl</a> <a href="#">Neurod1</a> <a href="#">Notch4</a> <a href="#">Nr0b1</a> <a href="#">Pou4f2</a> <a href="#">Pten</a> <a href="#">Robo1</a> <a href="#">Serpine2</a> <a href="#">Sfrp1</a> <a href="#">Sfrp2</a> <a href="#">Slit2</a> <a href="#">Spp1</a> <a href="#">Tcf7l2</a> <a href="#">Tcf15</a> <a href="#">Tgif2</a> <a href="#">Tiam1</a> <a href="#">Tob1</a> <a href="#">Vegfc</a> <a href="#">Zfhx3</a>                                                                                                                                                                                                                                                                                                                                                                                                                                                                                                                                                                                                                                                                                                                                                                                                                                                                                                                                                                                                                                           |
| 37/659 | 0.00063854 | <a href="#">GO:0045595</a> | regulation of cell differentiation                        | <a href="#">Adamts9</a> <a href="#">Akap2</a> <a href="#">Car2</a> <a href="#">Ccnd1</a> <a href="#">Cd276</a> <a href="#">Cdk6</a> <a href="#">Dpysl3</a> <a href="#">Efna1</a> <a href="#">Epb4.115</a> <a href="#">Fez1</a> <a href="#">Fgf4</a> <a href="#">Fgfr2</a> <a href="#">Gata2</a> <a href="#">Gli2</a> <a href="#">Hhex</a> <a href="#">Hoxa5</a> <a href="#">Id1</a> <a href="#">Irak3</a> <a href="#">Itgb3</a> <a href="#">Kit</a> <a href="#">Klf4</a> <a href="#">Lama1</a> <a href="#">Lmna</a> <a href="#">Mbp</a> <a href="#">Mtap1b</a> <a href="#">Ncam1</a> <a href="#">Nefl</a> <a href="#">Neurod1</a> <a href="#">Notch4</a> <a href="#">Nr0b1</a> <a href="#">Pou4f2</a> <a href="#">Pten</a> <a href="#">Robo1</a> <a href="#">Serpine2</a> <a href="#">Sfrp1</a> <a href="#">Sfrp2</a> <a href="#">Slit2</a> <a href="#">Sox15</a> <a href="#">Spp1</a> <a href="#">Tcf7l2</a> <a href="#">Tcf15</a> <a href="#">Tek</a> <a href="#">Tgif2</a> <a href="#">Tiam1</a> <a href="#">Tob1</a> <a href="#">Vegfc</a> <a href="#">Zfhx3</a>                                                                                                                                                                                                                                                                                                                                                                                                                                                                                                                                                                                                                                                                                                                                                                                                                     |
| 48/923 | 0.00067213 | <a href="#">GO:0050793</a> | regulation of developmental process                       | <a href="#">Afap1</a> <a href="#">Aqpat9</a> <a href="#">Ccnd1</a> <a href="#">Ceacam1</a> <a href="#">Chd7</a> <a href="#">Cited2</a> <a href="#">Cpeb1</a> <a href="#">Cyth3</a> <a href="#">Ddit4l</a> <a href="#">Efna1</a> <a href="#">Erbb3</a> <a href="#">Fgf15</a> <a href="#">Fgf4</a> <a href="#">Fgfbp1</a> <a href="#">Fgfr2</a> <a href="#">Gabbr1</a> <a href="#">Gli2</a> <a href="#">Grb10</a> <a href="#">Hey1</a> <a href="#">Hhex</a> <a href="#">Id1</a> <a href="#">Inhbb</a> <a href="#">Iqgap2</a> <a href="#">Irak3</a> <a href="#">Itga1</a> <a href="#">Itgb3</a> <a href="#">Kit</a> <a href="#">Klf4</a> <a href="#">Mbd2</a> <a href="#">Mcf2</a> <a href="#">Mtap1b</a> <a href="#">Ncam1</a> <a href="#">Npnt</a> <a href="#">Nr0b1</a> <a href="#">Nr3c1</a> <a href="#">Plce1</a> <a href="#">Plk2</a> <a href="#">Pten</a> <a href="#">Ptpre</a> <a href="#">Ralgds</a> <a href="#">Rasgrp2</a> <a href="#">Rgs16</a> <a href="#">Rgs19</a> <a href="#">Rims1</a> <a href="#">Robo1</a> <a href="#">Serpine2</a> <a href="#">Sfrp1</a> <a href="#">Sfrp2</a> <a href="#">Slc30a1</a> <a href="#">Slc7a3</a> <a href="#">Slit2</a> <a href="#">Spred1</a> <a href="#">Tcf7l2</a> <a href="#">Tek</a> <a href="#">Tiam1</a> <a href="#">Tob1</a> <a href="#">Trh</a> <a href="#">Vegfc</a> <a href="#">Ctgf</a> <a href="#">Epb4.115</a> <a href="#">Fez1</a> <a href="#">Fgf15</a> <a href="#">Fgf17</a> <a href="#">Fgf4</a> <a href="#">Fgfr2</a>                                                                                                                                                                                                                                                                                                                                                                                                    |
| 58/117 | 0.00068443 | <a href="#">GO:0023051</a> | regulation of signaling                                   | <a href="#">Calca</a> <a href="#">Cdk6</a> <a href="#">Cited2</a> <a href="#">Cyth3</a> <a href="#">Epb4.115</a> <a href="#">Nid1</a> <a href="#">Npnt</a> <a href="#">Spp1</a> <a href="#">Tek</a>                                                                                                                                                                                                                                                                                                                                                                                                                                                                                                                                                                                                                                                                                                                                                                                                                                                                                                                                                                                                                                                                                                                                                                                                                                                                                                                                                                                                                                                                                                                                                                                                                                                                                      |
| 7/52   | 0.00076952 | <a href="#">GO:0071363</a> | cellular response to growth factor stimulus               | <a href="#">Chd7</a> <a href="#">Cited2</a> <a href="#">Dner</a> <a href="#">Mtap1b</a> <a href="#">Pten</a> <a href="#">Robo1</a> <a href="#">Zic2</a>                                                                                                                                                                                                                                                                                                                                                                                                                                                                                                                                                                                                                                                                                                                                                                                                                                                                                                                                                                                                                                                                                                                                                                                                                                                                                                                                                                                                                                                                                                                                                                                                                                                                                                                                  |
| 9/82   | 0.00077427 | <a href="#">GO:0045785</a> | positive regulation of cell adhesion                      | <a href="#">Ccnd1</a> <a href="#">Nefl</a> <a href="#">Ptgs1</a> <a href="#">Trh</a>                                                                                                                                                                                                                                                                                                                                                                                                                                                                                                                                                                                                                                                                                                                                                                                                                                                                                                                                                                                                                                                                                                                                                                                                                                                                                                                                                                                                                                                                                                                                                                                                                                                                                                                                                                                                     |
| 7/54   | 0.00097316 | <a href="#">GO:0007417</a> | central nervous system development                        | <a href="#">Grb10</a> <a href="#">Hhex</a> <a href="#">Slit2</a> <a href="#">Vegfc</a>                                                                                                                                                                                                                                                                                                                                                                                                                                                                                                                                                                                                                                                                                                                                                                                                                                                                                                                                                                                                                                                                                                                                                                                                                                                                                                                                                                                                                                                                                                                                                                                                                                                                                                                                                                                                   |
| 4/17   | 0.00098253 | <a href="#">GO:0051412</a> | response to corticosterone stimulus                       | <a href="#">Akap2</a> <a href="#">Ctgf</a> <a href="#">Efna1</a> <a href="#">Epha2</a> <a href="#">Erbb3</a> <a href="#">Fgf15</a> <a href="#">Fgf17</a> <a href="#">Fgf4</a> <a href="#">Fgfr2</a> <a href="#">Grb10</a> <a href="#">Hpgd</a> <a href="#">Id1</a> <a href="#">Inhbb</a> <a href="#">Kit</a> <a href="#">Pten</a> <a href="#">Ptpre</a> <a href="#">Sorbs1</a> <a href="#">Tek</a> <a href="#">Tiam1</a> <a href="#">Vegfc</a> <a href="#">Car12</a> <a href="#">Car2</a> <a href="#">Car3</a> <a href="#">Car4</a> <a href="#">Gch1</a>                                                                                                                                                                                                                                                                                                                                                                                                                                                                                                                                                                                                                                                                                                                                                                                                                                                                                                                                                                                                                                                                                                                                                                                                                                                                                                                                 |
| 4/17   | 0.000984   | <a href="#">GO:0090287</a> | regulation of cellular response to growth factor stimulus | <a href="#">Abcb1b</a> <a href="#">Lrp2</a> <a href="#">Spp1</a> <a href="#">Trim25</a>                                                                                                                                                                                                                                                                                                                                                                                                                                                                                                                                                                                                                                                                                                                                                                                                                                                                                                                                                                                                                                                                                                                                                                                                                                                                                                                                                                                                                                                                                                                                                                                                                                                                                                                                                                                                  |
| 20/296 | 0.0011046  | <a href="#">GO:0007167</a> | enzyme linked receptor protein signaling pathway          | <a href="#">Efna1</a> <a href="#">Mbp</a> <a href="#">Mtap1b</a> <a href="#">Nefl</a> <a href="#">Robo1</a> <a href="#">Slit2</a> <a href="#">Spp1</a> <a href="#">Tiam1</a>                                                                                                                                                                                                                                                                                                                                                                                                                                                                                                                                                                                                                                                                                                                                                                                                                                                                                                                                                                                                                                                                                                                                                                                                                                                                                                                                                                                                                                                                                                                                                                                                                                                                                                             |
| 5/29   | 0.0012035  | <a href="#">GO:0006730</a> | one-carbon metabolic process                              | <a href="#">Cited2</a> <a href="#">Cxcr4</a> <a href="#">Gbx2</a> <a href="#">Gli2</a> <a href="#">Hhex</a> <a href="#">Hoxa5</a> <a href="#">Lama1</a> <a href="#">Notch4</a> <a href="#">Npnt</a> <a href="#">Sfrp2</a> <a href="#">Slit2</a>                                                                                                                                                                                                                                                                                                                                                                                                                                                                                                                                                                                                                                                                                                                                                                                                                                                                                                                                                                                                                                                                                                                                                                                                                                                                                                                                                                                                                                                                                                                                                                                                                                          |
| 4/18   | 0.0012462  | <a href="#">GO:0033280</a> | response to vitamin D                                     | <a href="#">Epb4.115</a> <a href="#">Fgfr2</a> <a href="#">Gli2</a> <a href="#">Hhex</a> <a href="#">Vegfc</a>                                                                                                                                                                                                                                                                                                                                                                                                                                                                                                                                                                                                                                                                                                                                                                                                                                                                                                                                                                                                                                                                                                                                                                                                                                                                                                                                                                                                                                                                                                                                                                                                                                                                                                                                                                           |
| 8/72   | 0.0013233  | <a href="#">GO:0050770</a> | regulation of axonogenesis                                |                                                                                                                                                                                                                                                                                                                                                                                                                                                                                                                                                                                                                                                                                                                                                                                                                                                                                                                                                                                                                                                                                                                                                                                                                                                                                                                                                                                                                                                                                                                                                                                                                                                                                                                                                                                                                                                                                          |
| 11/123 | 0.0013586  | <a href="#">GO:0048754</a> | branching morphogenesis of a tube                         |                                                                                                                                                                                                                                                                                                                                                                                                                                                                                                                                                                                                                                                                                                                                                                                                                                                                                                                                                                                                                                                                                                                                                                                                                                                                                                                                                                                                                                                                                                                                                                                                                                                                                                                                                                                                                                                                                          |
| 5/30   | 0.0014216  | <a href="#">GO:0016331</a> | morphogenesis of embryonic epithelium                     |                                                                                                                                                                                                                                                                                                                                                                                                                                                                                                                                                                                                                                                                                                                                                                                                                                                                                                                                                                                                                                                                                                                                                                                                                                                                                                                                                                                                                                                                                                                                                                                                                                                                                                                                                                                                                                                                                          |

|        |           |                            |                                                                  |                                                                                                                                                                                                                                                                                                                                                                                                                                                                                                                                                                                                                                                                                                                                                                                                                                                                                                                                                                                                                                                                                                                                                                                                                                                                                                                                                                      |
|--------|-----------|----------------------------|------------------------------------------------------------------|----------------------------------------------------------------------------------------------------------------------------------------------------------------------------------------------------------------------------------------------------------------------------------------------------------------------------------------------------------------------------------------------------------------------------------------------------------------------------------------------------------------------------------------------------------------------------------------------------------------------------------------------------------------------------------------------------------------------------------------------------------------------------------------------------------------------------------------------------------------------------------------------------------------------------------------------------------------------------------------------------------------------------------------------------------------------------------------------------------------------------------------------------------------------------------------------------------------------------------------------------------------------------------------------------------------------------------------------------------------------|
| 5/30   | 0.0014238 | <a href="#">GO:0021915</a> | neural tube development                                          | <a href="#">Epha2</a> <a href="#">Gli2</a> <a href="#">Sfrp1</a> <a href="#">Sfrp2</a> <a href="#">Tcf7l2</a>                                                                                                                                                                                                                                                                                                                                                                                                                                                                                                                                                                                                                                                                                                                                                                                                                                                                                                                                                                                                                                                                                                                                                                                                                                                        |
| 12/144 | 0.0016203 | <a href="#">GO:0010975</a> | regulation of neuron projection development                      | <a href="#">Dpysl3</a> <a href="#">Efna1</a> <a href="#">Fez1</a> <a href="#">Mbp</a> <a href="#">Mtap1b</a> <a href="#">Nefl</a> <a href="#">Pten</a> <a href="#">Robo1</a> <a href="#">Serpine2</a> <a href="#">Slit2</a> <a href="#">Spp1</a> <a href="#">Tiam1</a>                                                                                                                                                                                                                                                                                                                                                                                                                                                                                                                                                                                                                                                                                                                                                                                                                                                                                                                                                                                                                                                                                               |
| 15/202 | 0.00163   | <a href="#">GO:0007169</a> | transmembrane receptor protein tyrosine kinase signaling pathway | <a href="#">Ctgf</a> <a href="#">Efna1</a> <a href="#">Epha2</a> <a href="#">Erbb3</a> <a href="#">Fgf15</a> <a href="#">Fgf17</a> <a href="#">Fgf4</a> <a href="#">Fgfr2</a> <a href="#">Grb10</a> <a href="#">Kit</a> <a href="#">Pten</a> <a href="#">Sorbs1</a> <a href="#">Tek</a> <a href="#">Tiam1</a> <a href="#">Vegfc</a>                                                                                                                                                                                                                                                                                                                                                                                                                                                                                                                                                                                                                                                                                                                                                                                                                                                                                                                                                                                                                                  |
| 5/31   | 0.0016686 | <a href="#">GO:0046324</a> | regulation of glucose import                                     | <a href="#">Erbb3</a> <a href="#">Fgf15</a> <a href="#">Grb10</a> <a href="#">Pea15a</a> <a href="#">Sorbs1</a>                                                                                                                                                                                                                                                                                                                                                                                                                                                                                                                                                                                                                                                                                                                                                                                                                                                                                                                                                                                                                                                                                                                                                                                                                                                      |
| 10/109 | 0.0017699 | <a href="#">GO:0048732</a> | gland development                                                | <a href="#">Cited2</a> <a href="#">Fgfr2</a> <a href="#">Gata2</a> <a href="#">Gli1</a> <a href="#">Gli2</a> <a href="#">Hhex</a> <a href="#">Hoxa5</a> <a href="#">Notch4</a> <a href="#">Nr0b1</a> <a href="#">Nr3c1</a>                                                                                                                                                                                                                                                                                                                                                                                                                                                                                                                                                                                                                                                                                                                                                                                                                                                                                                                                                                                                                                                                                                                                           |
| 10/110 | 0.0018991 | <a href="#">GO:0033273</a> | response to vitamin                                              | <a href="#">Abca1</a> <a href="#">Abcb1b</a> <a href="#">Ccnd1</a> <a href="#">Klf4</a> <a href="#">Lefty1</a> <a href="#">Lrp2</a> <a href="#">Mtap1b</a> <a href="#">Spp1</a> <a href="#">Tek</a> <a href="#">Trim25</a>                                                                                                                                                                                                                                                                                                                                                                                                                                                                                                                                                                                                                                                                                                                                                                                                                                                                                                                                                                                                                                                                                                                                           |
| 5/32   | 0.0019438 | <a href="#">GO:0008543</a> | fibroblast growth factor receptor signaling pathway              | <a href="#">Ctgf</a> <a href="#">Fgf15</a> <a href="#">Fgf17</a> <a href="#">Fgf4</a> <a href="#">Fgfr2</a>                                                                                                                                                                                                                                                                                                                                                                                                                                                                                                                                                                                                                                                                                                                                                                                                                                                                                                                                                                                                                                                                                                                                                                                                                                                          |
| 19/292 | 0.0022394 | <a href="#">GO:0003006</a> | developmental process involved in reproduction                   | <a href="#">Bik</a> <a href="#">Calca</a> <a href="#">Ccnd1</a> <a href="#">Chd7</a> <a href="#">Cited2</a> <a href="#">Cxcr4</a> <a href="#">Dmrt1</a> <a href="#">Fgfr2</a> <a href="#">Gli2</a> <a href="#">Inhbb</a> <a href="#">Kit</a> <a href="#">Nr0b1</a> <a href="#">Pten</a> <a href="#">Rhox5</a> <a href="#">Sept4</a> <a href="#">Serpine2</a> <a href="#">Sfrp1</a> <a href="#">Sfrp2</a> <a href="#">Tcf7l2</a>                                                                                                                                                                                                                                                                                                                                                                                                                                                                                                                                                                                                                                                                                                                                                                                                                                                                                                                                      |
| 8/78   | 0.0022735 | <a href="#">GO:0048568</a> | embryonic organ development                                      | <a href="#">Cited2</a> <a href="#">Epas1</a> <a href="#">Fgfr2</a> <a href="#">Gata2</a> <a href="#">Gli2</a> <a href="#">Hhex</a> <a href="#">Plcd1</a> <a href="#">Plcd3</a>                                                                                                                                                                                                                                                                                                                                                                                                                                                                                                                                                                                                                                                                                                                                                                                                                                                                                                                                                                                                                                                                                                                                                                                       |
| 60/128 | 0.0023357 | <a href="#">GO:0048583</a> | regulation of response to stimulus                               | <a href="#">Afap1</a> <a href="#">Aqpat9</a> <a href="#">B2m</a> <a href="#">Calca</a> <a href="#">Ccnd1</a> <a href="#">Cd276</a> <a href="#">Ceacam1</a> <a href="#">Cited2</a> <a href="#">Cxcr4</a> <a href="#">Cyth3</a> <a href="#">Ddit4l</a> <a href="#">Efna1</a> <a href="#">Erbb3</a> <a href="#">F2rl1</a> <a href="#">Fgf15</a> <a href="#">Fgf4</a> <a href="#">Fgfbp1</a> <a href="#">Fgfr2</a> <a href="#">Gab2</a> <a href="#">Gli2</a> <a href="#">Grb10</a> <a href="#">H2-BI</a> <a href="#">Hey1</a> <a href="#">Hhex</a> <a href="#">Id1</a> <a href="#">Iqqap2</a> <a href="#">Irak3</a> <a href="#">Itga1</a> <a href="#">Itgb3</a> <a href="#">Kit</a> <a href="#">Klf4</a> <a href="#">Mbd2</a> <a href="#">Mcf2</a> <a href="#">Myo1f</a> <a href="#">Ncam1</a> <a href="#">Npnt</a> <a href="#">Nr0b1</a> <a href="#">Nr3c1</a> <a href="#">Plce1</a> <a href="#">Plk2</a> <a href="#">Pten</a> <a href="#">Ptpre</a> <a href="#">Ralgds</a> <a href="#">Rasgrp2</a> <a href="#">Rgs16</a> <a href="#">Rgs19</a> <a href="#">Robo1</a> <a href="#">Serpine2</a> <a href="#">Sfrp1</a> <a href="#">Sfrp2</a> <a href="#">Slc7a3</a> <a href="#">Slit2</a> <a href="#">Spp1</a> <a href="#">Spred1</a> <a href="#">Tcf7l2</a> <a href="#">Tek</a> <a href="#">Tiam1</a> <a href="#">Tob1</a> <a href="#">Vegfc</a> <a href="#">Zc3hav1</a> |
| 27/474 | 0.0025059 | <a href="#">GO:0048731</a> | system development                                               | <a href="#">Chd7</a> <a href="#">Cited2</a> <a href="#">Cxcr4</a> <a href="#">Dner</a> <a href="#">Dpysl3</a> <a href="#">E130309F12Rik</a> <a href="#">Enah</a> <a href="#">Epha2</a> <a href="#">Erbb3</a> <a href="#">Gbx2</a> <a href="#">Gli2</a> <a href="#">Hoxa5</a> <a href="#">Id1</a> <a href="#">Lhx1</a> <a href="#">Mtap1b</a> <a href="#">Ndrgr2</a> <a href="#">Neurod1</a> <a href="#">Pou4f2</a> <a href="#">Prps1</a> <a href="#">Pten</a> <a href="#">Pth1r</a> <a href="#">Robo1</a> <a href="#">Sema4a</a> <a href="#">Serpine2</a> <a href="#">Slit2</a> <a href="#">Zfp423</a> <a href="#">Zic2</a>                                                                                                                                                                                                                                                                                                                                                                                                                                                                                                                                                                                                                                                                                                                                          |

---

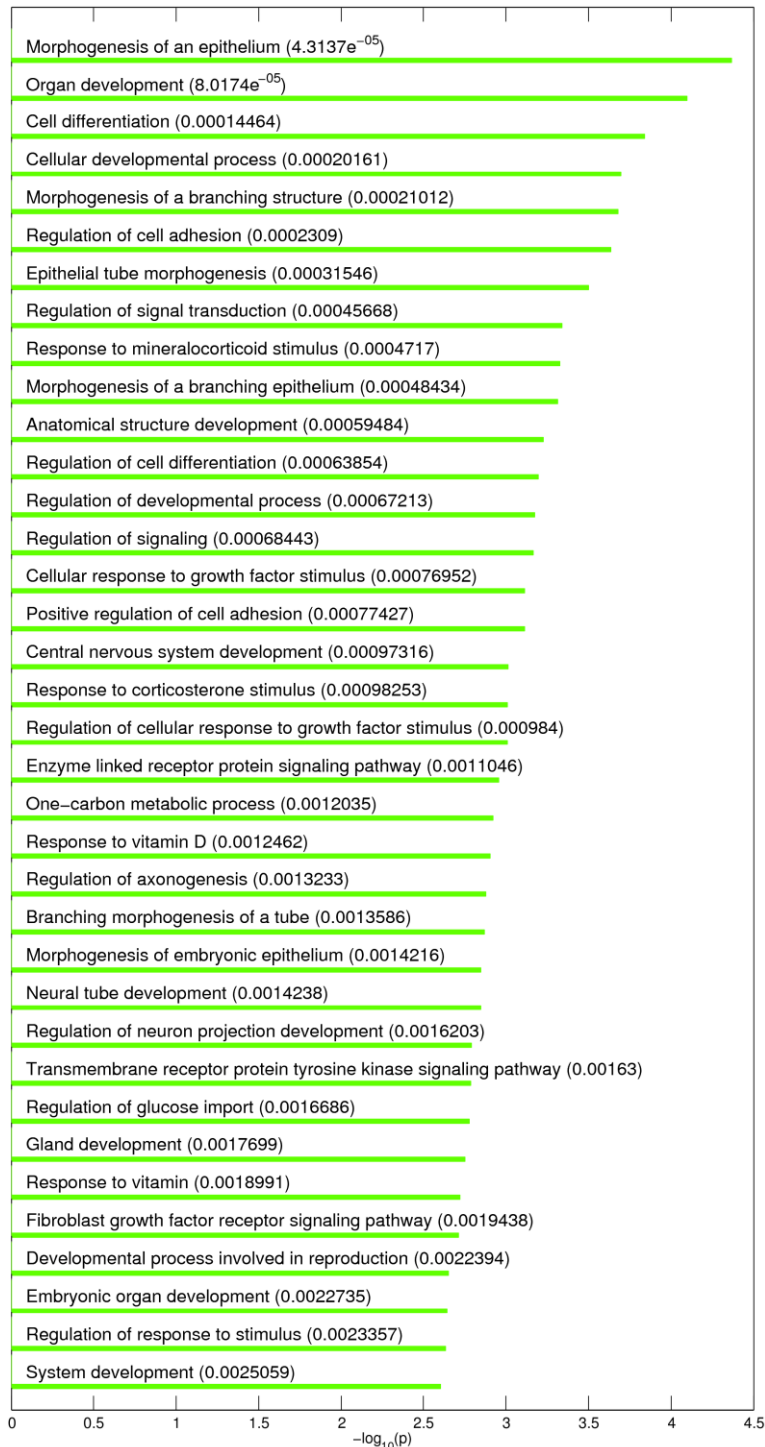

Figure 33: Plot bar of the  $-\log_{10}(p)$  of the significant enriched terms of Biological-process-PGC KO-<->-PGC CTRL-Log2(2.8284). The longer the bar, the higher is the statistical significance of the enrichment (in parenthesis are written the p-values)



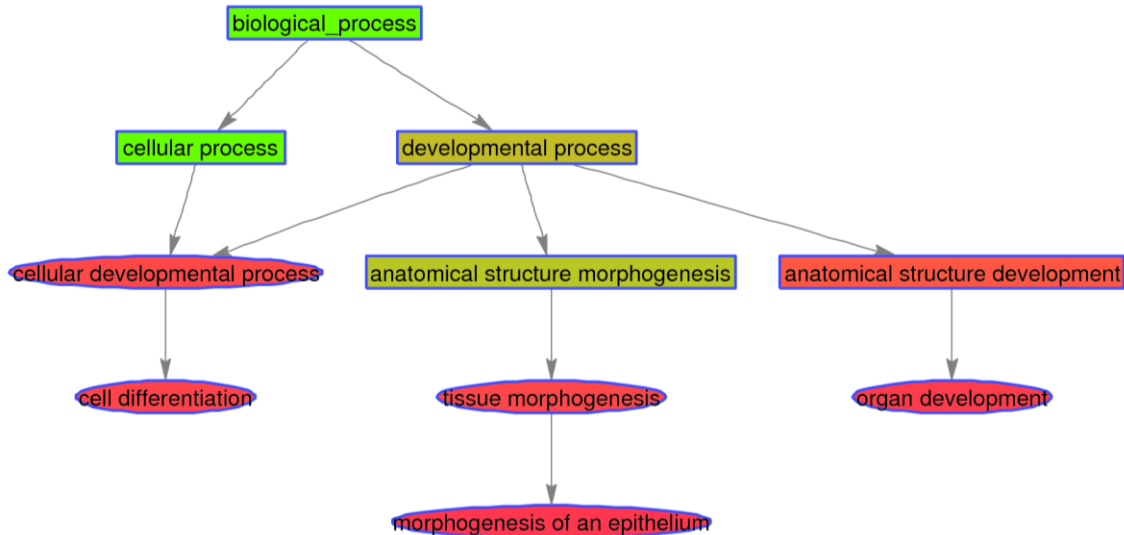

Figure 34: Direct acyclic graph (DAG) associated to the 5 top higher significant enriched gene ontology terms. The higher the significance of the term the more red is the box framing the term. The significant enriched terms are encircled by ellipses.

#### Cellular-component-PGC KO-<->-PGC CTRL-Log2(2.8284)

Table : Significant GO enrichment terms for Cellular-component-PGC KO-<->-PGC CTRL-Log2(2.8284)

| Count Ratio  | p-val      | GO id                          | GO term                  | Genes                                                                                                                                                                                                                                                                                                                                                                                                                                                                                                                                                                                                                                                                                                                                                                                                                                                                                                                                                                                                                                                                                                                                                                                                                                                    |
|--------------|------------|--------------------------------|--------------------------|----------------------------------------------------------------------------------------------------------------------------------------------------------------------------------------------------------------------------------------------------------------------------------------------------------------------------------------------------------------------------------------------------------------------------------------------------------------------------------------------------------------------------------------------------------------------------------------------------------------------------------------------------------------------------------------------------------------------------------------------------------------------------------------------------------------------------------------------------------------------------------------------------------------------------------------------------------------------------------------------------------------------------------------------------------------------------------------------------------------------------------------------------------------------------------------------------------------------------------------------------------|
| 55/1203<br>5 | 5.5906e-09 | <a href="#">GO:004445</a><br>9 | plasma membrane part     | <a href="#">Abca1</a> <a href="#">Abcb1b</a> <a href="#">Aif1l</a> <a href="#">Ank2</a> <a href="#">Anxa4</a> <a href="#">Atp1b2</a> <a href="#">Atp8b1</a> <a href="#">B2m</a> <a href="#">Car2</a> <a href="#">Car4</a> <a href="#">Cd276</a> <a href="#">Cdhr1</a> <a href="#">Cltb</a> <a href="#">Dmd</a> <a href="#">Dsp</a> <a href="#">Dtna</a> <a href="#">Efna1</a> <a href="#">Enpp2</a> <a href="#">Epb4.1l5</a> <a href="#">Epha2</a> <a href="#">Erbb3</a> <a href="#">F2r1</a> <a href="#">Gabbr1</a> <a href="#">Gjb3</a> <a href="#">Gng12</a> <a href="#">Gpc4</a> <a href="#">H2-BI</a> <a href="#">Hck</a> <a href="#">Hk1</a> <a href="#">Itga1</a> <a href="#">Itgb3</a> <a href="#">Kcnj3</a> <a href="#">Kctd15</a> <a href="#">Kit</a> <a href="#">Laptm5</a> <a href="#">Lcp1</a> <a href="#">Lmo7</a> <a href="#">Lrp2</a> <a href="#">Ly6a</a> <a href="#">Ly75</a> <a href="#">Ncam1</a> <a href="#">Pth1r</a> <a href="#">Rasgrp2</a> <a href="#">Robo1</a> <a href="#">S100a10</a> <a href="#">S100a6</a> <a href="#">Slc30a1</a> <a href="#">Slc6a15</a> <a href="#">Slc6a8</a> <a href="#">Slc7a3</a> <a href="#">Slco4a1</a> <a href="#">Slco4c1</a> <a href="#">Sorbs1</a> <a href="#">Spred1</a> <a href="#">Tek</a> |
| 10/94<br>6   | 0.0001127  | <a href="#">GO:003005</a><br>5 | cell-substrate junction  | <a href="#">Actn2</a> <a href="#">Cass4</a> <a href="#">Dmd</a> <a href="#">Enah</a> <a href="#">Epb4.1l5</a> <a href="#">Lpp</a> <a href="#">Parvb</a> <a href="#">Sorbs1</a> <a href="#">Tes</a> <a href="#">Trim25</a>                                                                                                                                                                                                                                                                                                                                                                                                                                                                                                                                                                                                                                                                                                                                                                                                                                                                                                                                                                                                                                |
| 28/547<br>4  | 0.0005703  | <a href="#">GO:003005</a><br>4 | cell junction            | <a href="#">Abcb1b</a> <a href="#">Actn2</a> <a href="#">Ahnak</a> <a href="#">Camk2n1</a> <a href="#">Cass4</a> <a href="#">Cldn5</a> <a href="#">Cpeb1</a> <a href="#">Dmd</a> <a href="#">Dsp</a> <a href="#">Dtna</a> <a href="#">Enah</a> <a href="#">Epb4.1l5</a> <a href="#">Fermt3</a> <a href="#">Gabbr1</a> <a href="#">Gjb3</a> <a href="#">Homer2</a> <a href="#">Jam2</a> <a href="#">Lcp1</a> <a href="#">Lmo7</a> <a href="#">Lpp</a> <a href="#">Parvb</a> <a href="#">Pecam1</a> <a href="#">Rasgrp2</a> <a href="#">Rimbp2</a> <a href="#">Rims1</a> <a href="#">Sorbs1</a> <a href="#">Tes</a> <a href="#">Trim25</a>                                                                                                                                                                                                                                                                                                                                                                                                                                                                                                                                                                                                                 |
| 6/50<br>6    | 0.0011676  | <a href="#">GO:003125</a><br>6 | leading edge membrane    | <a href="#">Aif1l</a> <a href="#">Epb4.1l5</a> <a href="#">Gabbr1</a> <a href="#">Lcp1</a> <a href="#">Rasgrp2</a> <a href="#">Robo1</a>                                                                                                                                                                                                                                                                                                                                                                                                                                                                                                                                                                                                                                                                                                                                                                                                                                                                                                                                                                                                                                                                                                                 |
| 11/147<br>2  | 0.0012404  | <a href="#">GO:000591</a><br>2 | adherens junction        | <a href="#">Actn2</a> <a href="#">Cass4</a> <a href="#">Dsp</a> <a href="#">Enah</a> <a href="#">Epb4.1l5</a> <a href="#">Lmo7</a> <a href="#">Lpp</a> <a href="#">Parvb</a> <a href="#">Sorbs1</a> <a href="#">Tes</a> <a href="#">Trim25</a>                                                                                                                                                                                                                                                                                                                                                                                                                                                                                                                                                                                                                                                                                                                                                                                                                                                                                                                                                                                                           |
| 4/22<br>7    | 0.0013777  | <a href="#">GO:003258</a><br>7 | ruffle membrane          | <a href="#">Aif1l</a> <a href="#">Epb4.1l5</a> <a href="#">Lcp1</a> <a href="#">Rasgrp2</a>                                                                                                                                                                                                                                                                                                                                                                                                                                                                                                                                                                                                                                                                                                                                                                                                                                                                                                                                                                                                                                                                                                                                                              |
| 36/838<br>5  | 0.0026916  | <a href="#">GO:004299</a><br>5 | cell projection          | <a href="#">Actn2</a> <a href="#">Aif1l</a> <a href="#">Calca</a> <a href="#">Camk2n1</a> <a href="#">Car2</a> <a href="#">Cdk6</a> <a href="#">Crmp1</a> <a href="#">Cyth3</a> <a href="#">Dner</a> <a href="#">Dock4</a> <a href="#">Dpysl3</a> <a href="#">Enah</a> <a href="#">Fermt3</a> <a href="#">Fez1</a> <a href="#">Frmd4b</a> <a href="#">Gabbr1</a> <a href="#">Gli1</a> <a href="#">Gli2</a> <a href="#">Itga1</a> <a href="#">Kif3a</a> <a href="#">Lcp1</a> <a href="#">Lrp2</a> <a href="#">Mbp</a> <a href="#">Mtap1b</a> <a href="#">Ncam1</a> <a href="#">Nefl</a> <a href="#">Pten</a> <a href="#">Ptpn13</a> <a href="#">Rasgrp2</a> <a href="#">Rgs19</a> <a href="#">Robo1</a> <a href="#">S100a6</a> <a href="#">Sept4</a> <a href="#">Spp1</a> <a href="#">Stmn2</a> <a href="#">Tek</a>                                                                                                                                                                                                                                                                                                                                                                                                                                       |
| 9/118<br>3   | 0.0028231  | <a href="#">GO:003125</a><br>3 | cell projection membrane | <a href="#">Aif1l</a> <a href="#">Atp8b1</a> <a href="#">Epb4.1l5</a> <a href="#">Gabbr1</a> <a href="#">Lcp1</a> <a href="#">Lrp2</a> <a href="#">Pth1r</a> <a href="#">Rasgrp2</a> <a href="#">Robo1</a>                                                                                                                                                                                                                                                                                                                                                                                                                                                                                                                                                                                                                                                                                                                                                                                                                                                                                                                                                                                                                                               |
| 4/28<br>4    | 0.0036285  | <a href="#">GO:000588</a><br>4 | actin filament           | <a href="#">Afap1</a> <a href="#">Aif1l</a> <a href="#">Gng12</a> <a href="#">Lcp1</a>                                                                                                                                                                                                                                                                                                                                                                                                                                                                                                                                                                                                                                                                                                                                                                                                                                                                                                                                                                                                                                                                                                                                                                   |
| 12/192<br>1  | 0.0038333  | <a href="#">GO:004512</a><br>1 | membrane raft            | <a href="#">Abca1</a> <a href="#">Dmd</a> <a href="#">Gabbr1</a> <a href="#">Hck</a> <a href="#">Hk1</a> <a href="#">Itga1</a> <a href="#">Pecam1</a> <a href="#">Plcd1</a> <a href="#">Rgs16</a> <a href="#">Sorbs1</a> <a href="#">Spred1</a> <a href="#">Tek</a>                                                                                                                                                                                                                                                                                                                                                                                                                                                                                                                                                                                                                                                                                                                                                                                                                                                                                                                                                                                      |
| 15/281<br>6  | 0.00639    | <a href="#">GO:000998</a><br>6 | cell surface             | <a href="#">Ceacam1</a> <a href="#">Dmd</a> <a href="#">Fgfbbp1</a> <a href="#">Fgfr2</a> <a href="#">Gpr126</a> <a href="#">H2-BI</a> <a href="#">Itgb3</a> <a href="#">Kcnj3</a> <a href="#">Kit</a> <a href="#">Notch4</a> <a href="#">Pecam1</a> <a href="#">Robo1</a> <a href="#">Slit2</a> <a href="#">Sulf1</a> <a href="#">Tek</a>                                                                                                                                                                                                                                                                                                                                                                                                                                                                                                                                                                                                                                                                                                                                                                                                                                                                                                               |
| 42/1089<br>7 | 0.0090185  | <a href="#">GO:000026</a><br>7 | cell fraction            | <a href="#">Abca1</a> <a href="#">Atp8b1</a> <a href="#">Camk2n1</a> <a href="#">Car4</a> <a href="#">Ccdc88c</a> <a href="#">Cerk</a> <a href="#">Cpeb1</a> <a href="#">Cyp1b1</a> <a href="#">Dmd</a> <a href="#">Dpysl3</a> <a href="#">Dtna</a> <a href="#">Fgf4</a> <a href="#">Gabbr1</a> <a href="#">Gch1</a> <a href="#">Gli2</a> <a href="#">Gpc4</a> <a href="#">Id1</a> <a href="#">Itga1</a> <a href="#">Itgb3</a> <a href="#">Jakmip1</a>                                                                                                                                                                                                                                                                                                                                                                                                                                                                                                                                                                                                                                                                                                                                                                                                   |

|         |          |                                                                                    |                                                                                                                                                                                                                                                                                                                                                                                                                                                                                                                                                                                                                                                                                                                                                                                                                                                                                                                                                                                                                                                                                                                                                                                                                                                                                                                                                                                                                                                                                                                                                                                                                                                                                                                                                                                                                                                                                                     |
|---------|----------|------------------------------------------------------------------------------------|-----------------------------------------------------------------------------------------------------------------------------------------------------------------------------------------------------------------------------------------------------------------------------------------------------------------------------------------------------------------------------------------------------------------------------------------------------------------------------------------------------------------------------------------------------------------------------------------------------------------------------------------------------------------------------------------------------------------------------------------------------------------------------------------------------------------------------------------------------------------------------------------------------------------------------------------------------------------------------------------------------------------------------------------------------------------------------------------------------------------------------------------------------------------------------------------------------------------------------------------------------------------------------------------------------------------------------------------------------------------------------------------------------------------------------------------------------------------------------------------------------------------------------------------------------------------------------------------------------------------------------------------------------------------------------------------------------------------------------------------------------------------------------------------------------------------------------------------------------------------------------------------------------|
|         |          |                                                                                    | <a href="#">Kif1b</a> <a href="#">Lmna</a> <a href="#">Lrp2</a> <a href="#">Mapk13</a> <a href="#">Mep1b</a> <a href="#">Mtap1b</a> <a href="#">Nr0b1</a> <a href="#">Pea15a</a> <a href="#">Pecam1</a> <a href="#">Plcd1</a> <a href="#">Plcd3</a> <a href="#">Plice1</a> <a href="#">Prps1</a> <a href="#">Prps2</a> <a href="#">Pten</a> <a href="#">Ptgs1</a> <a href="#">Pygl</a> <a href="#">Rasgrp2</a> <a href="#">Rgs16</a> <a href="#">Rgs19</a> <a href="#">Serpine2</a> <a href="#">Slc27a2</a> <a href="#">Cdk6</a> <a href="#">Cyth3</a> <a href="#">Frmd4b</a> <a href="#">Lcp1</a> <a href="#">S100a6</a>                                                                                                                                                                                                                                                                                                                                                                                                                                                                                                                                                                                                                                                                                                                                                                                                                                                                                                                                                                                                                                                                                                                                                                                                                                                                           |
| 5/57    | 0.01175  | <a href="#">GO:000172</a> ruffle<br><a href="#">6</a>                              |                                                                                                                                                                                                                                                                                                                                                                                                                                                                                                                                                                                                                                                                                                                                                                                                                                                                                                                                                                                                                                                                                                                                                                                                                                                                                                                                                                                                                                                                                                                                                                                                                                                                                                                                                                                                                                                                                                     |
| 76/2240 | 0.015546 | <a href="#">GO:000588</a> plasma membrane<br><a href="#">6</a>                     | <a href="#">Abca1</a> <a href="#">Adam23</a> <a href="#">Aif1l</a> <a href="#">Ank2</a> <a href="#">Camk2n1</a> <a href="#">Car4</a> <a href="#">Cdhr1</a> <a href="#">Ceacam1</a> <a href="#">Cldn5</a> <a href="#">Cpeb1</a> <a href="#">Cxcr4</a> <a href="#">Cyth3</a> <a href="#">Diras2</a> <a href="#">Dmd</a> <a href="#">Dner</a> <a href="#">Dtna</a> <a href="#">Efn1</a> <a href="#">Enox1</a> <a href="#">Epb4.115</a> <a href="#">Epha2</a> <a href="#">Eras</a> <a href="#">F2rl1</a> <a href="#">Fez1</a> <a href="#">Fgfbp1</a> <a href="#">Gab2</a> <a href="#">Gabbr1</a> <a href="#">Gbp2</a> <a href="#">Gjb3</a> <a href="#">Gng12</a> <a href="#">Gpc4</a> <a href="#">Gpr126</a> <a href="#">H2-BI</a> <a href="#">Homer2</a> <a href="#">Jam2</a> <a href="#">Lcp1</a> <a href="#">Lpar4</a> <a href="#">Lpp</a> <a href="#">Ly6a</a> <a href="#">Mbp</a> <a href="#">Meg3</a> <a href="#">Mras</a> <a href="#">Mtap1b</a> <a href="#">Ncam1</a> <a href="#">Notch4</a> <a href="#">Paqr8</a> <a href="#">Parvb</a> <a href="#">Pecam1</a> <a href="#">Plice1</a> <a href="#">Prkch</a> <a href="#">Ptgs1</a> <a href="#">Pth1r</a> <a href="#">Ptpn13</a> <a href="#">Ptpre</a> <a href="#">Rab31</a> <a href="#">Rasgrp2</a> <a href="#">Rgs16</a> <a href="#">Rgs19</a> <a href="#">Rimbp2</a> <a href="#">Rims1</a> <a href="#">S100a6</a> <a href="#">Sfrp1</a> <a href="#">Slc30a1</a> <a href="#">Slc38a4</a> <a href="#">Slc40a1</a> <a href="#">Slc5a5</a> <a href="#">Slc7a3</a> <a href="#">Slco4c1</a> <a href="#">Sliit2</a> <a href="#">Sorbs1</a> <a href="#">Spred1</a> <a href="#">Tek</a> <a href="#">Tiam1</a> <a href="#">Trh</a> <a href="#">Trpm1</a> <a href="#">Tst</a> <a href="#">Ttyh2</a>                                                                                                                                                      |
| 36/947  | 0.018128 | <a href="#">GO:004443</a> cytoskeletal part<br><a href="#">0</a>                   | <a href="#">1190002H23Rik</a> <a href="#">Actn2</a> <a href="#">Actn3</a> <a href="#">Afap1</a> <a href="#">Aif1l</a> <a href="#">Arpc1b</a> <a href="#">Aurkc</a> <a href="#">Camk2n1</a> <a href="#">Cdc14a</a> <a href="#">Cpeb1</a> <a href="#">Crmp1</a> <a href="#">Enah</a> <a href="#">Fermt3</a> <a href="#">Fez1</a> <a href="#">Gng12</a> <a href="#">Homer2</a> <a href="#">Igf2bp2</a> <a href="#">Jakmip1</a> <a href="#">Kif1b</a> <a href="#">Kif3a</a> <a href="#">Lcp1</a> <a href="#">Lmna</a> <a href="#">Mtap1b</a> <a href="#">Myo1f</a> <a href="#">Nefl</a> <a href="#">Pcgf5</a> <a href="#">Pea15a</a> <a href="#">Psrc1</a> <a href="#">Rassf5</a> <a href="#">Sept4</a> <a href="#">Sfi1</a> <a href="#">Sorbs1</a> <a href="#">Spnb3</a> <a href="#">Tubb2a</a> <a href="#">Tubb2a-ps2</a> <a href="#">Tubb2b</a>                                                                                                                                                                                                                                                                                                                                                                                                                                                                                                                                                                                                                                                                                                                                                                                                                                                                                                                                                                                                                                                      |
| 31/798  | 0.020459 | <a href="#">GO:000585</a> cytoskeleton<br><a href="#">6</a>                        | <a href="#">1190002H23Rik</a> <a href="#">Actn2</a> <a href="#">Afap1</a> <a href="#">Aif1l</a> <a href="#">Ank2</a> <a href="#">Arpc1b</a> <a href="#">Aurkc</a> <a href="#">Calcoco2</a> <a href="#">Cass4</a> <a href="#">Cdc14a</a> <a href="#">Coro2b</a> <a href="#">Crmp1</a> <a href="#">Dmd</a> <a href="#">Dsp</a> <a href="#">Enah</a> <a href="#">Epb4.115</a> <a href="#">Epb4.9</a> <a href="#">Fez1</a> <a href="#">Frmd4b</a> <a href="#">Jakmip1</a> <a href="#">Kif1b</a> <a href="#">Lcp1</a> <a href="#">Mical1</a> <a href="#">Mtap1b</a> <a href="#">Myo1f</a> <a href="#">Parvb</a> <a href="#">Psrc1</a> <a href="#">Ptpn13</a> <a href="#">Sept4</a> <a href="#">Sfi1</a> <a href="#">Sorbs1</a>                                                                                                                                                                                                                                                                                                                                                                                                                                                                                                                                                                                                                                                                                                                                                                                                                                                                                                                                                                                                                                                                                                                                                                           |
| 10/189  | 0.023865 | <a href="#">GO:000989</a> external side of<br>plasma membrane<br><a href="#">7</a> | <a href="#">B2m</a> <a href="#">Cd276</a> <a href="#">Gpc4</a> <a href="#">Itga1</a> <a href="#">Itgb3</a> <a href="#">Kcnj3</a> <a href="#">Kit</a> <a href="#">Ly6a</a> <a href="#">Ly75</a> <a href="#">Ncam1</a>                                                                                                                                                                                                                                                                                                                                                                                                                                                                                                                                                                                                                                                                                                                                                                                                                                                                                                                                                                                                                                                                                                                                                                                                                                                                                                                                                                                                                                                                                                                                                                                                                                                                                |
| 138/442 | 0.024564 | <a href="#">GO:000573</a> cytoplasm<br><a href="#">4</a>                           | <a href="#">1190002H23Rik</a> <a href="#">Abhd5</a> <a href="#">Actn2</a> <a href="#">Afap1</a> <a href="#">Aif1l</a> <a href="#">Aifm3</a> <a href="#">Ak4</a> <a href="#">Akr1b8</a> <a href="#">Ank2</a> <a href="#">Anxa4</a> <a href="#">Arpc1b</a> <a href="#">Atg16l2</a> <a href="#">Atp1b2</a> <a href="#">Aurkc</a> <a href="#">Bcl11a</a> <a href="#">Calca</a> <a href="#">Calcoco2</a> <a href="#">Car2</a> <a href="#">Car3</a> <a href="#">Cass4</a> <a href="#">Ccbl1</a> <a href="#">Ccdc88c</a> <a href="#">Ccnd1</a> <a href="#">Cdc14a</a> <a href="#">Cdk6</a> <a href="#">Celf4</a> <a href="#">Cerk</a> <a href="#">Cited2</a> <a href="#">Ckb</a> <a href="#">Coro2b</a> <a href="#">Cpeb1</a> <a href="#">Crmp1</a> <a href="#">Cth</a> <a href="#">Cyth3</a> <a href="#">Ddit4l</a> <a href="#">Dmd</a> <a href="#">Dnmt3l</a> <a href="#">Dppa3</a> <a href="#">Dpysl3</a> <a href="#">Dtna</a> <a href="#">Enah</a> <a href="#">Epas1</a> <a href="#">Epb4.115</a> <a href="#">Epb4.9</a> <a href="#">Fez1</a> <a href="#">Fgfr2</a> <a href="#">Foxp1</a> <a href="#">Frmd4b</a> <a href="#">Gab2</a> <a href="#">Gabbr1</a> <a href="#">Galk1</a> <a href="#">Gbp3</a> <a href="#">Gca</a> <a href="#">Gch1</a> <a href="#">Gfpt2</a> <a href="#">Gli1</a> <a href="#">Gli2</a> <a href="#">Gpr126</a> <a href="#">Grb10</a> <a href="#">Gstm1</a> <a href="#">Gstm3</a> <a href="#">Gstt2</a> <a href="#">H2-BI</a> <a href="#">Habbp4</a> <a href="#">Hhex</a> <a href="#">Homer2</a> <a href="#">Hpgd</a> <a href="#">Hspb8</a> <a href="#">Id1</a> <a href="#">Igf2bp2</a> <a href="#">Irak3</a> <a href="#">Itga1</a> <a href="#">Jakmip1</a> <a href="#">Kif1b</a> <a href="#">Kit</a> <a href="#">Lcp1</a> <a href="#">Lnx1</a> <a href="#">Lpp</a> <a href="#">Lrp2</a> <a href="#">Mbd2</a> <a href="#">Mbnl2</a> <a href="#">Mbp</a> <a href="#">Mic...</a> |
| 19/448  | 0.027637 | <a href="#">GO:004446</a> cell projection part<br><a href="#">3</a>                | <a href="#">Aif1l</a> <a href="#">Atp8b1</a> <a href="#">Calca</a> <a href="#">Cldn5</a> <a href="#">Cxcr4</a> <a href="#">Dpysl3</a> <a href="#">Epb4.115</a> <a href="#">Gabbr1</a> <a href="#">Kif3a</a> <a href="#">Lcp1</a> <a href="#">Lrp2</a> <a href="#">Mbp</a> <a href="#">Mtap1b</a> <a href="#">Nefl</a> <a href="#">Pten</a> <a href="#">Pth1r</a> <a href="#">Rasgrp2</a> <a href="#">Robo1</a> <a href="#">Stmn2</a>                                                                                                                                                                                                                                                                                                                                                                                                                                                                                                                                                                                                                                                                                                                                                                                                                                                                                                                                                                                                                                                                                                                                                                                                                                                                                                                                                                                                                                                                |
| 32/851  | 0.029318 | <a href="#">GO:000562</a> insoluble fraction<br><a href="#">6</a>                  | <a href="#">Abca1</a> <a href="#">Atp8b1</a> <a href="#">Camk2n1</a> <a href="#">Car4</a> <a href="#">Ccdc88c</a> <a href="#">Cerk</a> <a href="#">Cpeb1</a> <a href="#">Cyp1b1</a> <a href="#">Dmd</a> <a href="#">Dtna</a> <a href="#">Gabbr1</a> <a href="#">Gli2</a> <a href="#">Gpc4</a> <a href="#">Itga1</a> <a href="#">Itgb3</a> <a href="#">Jakmip1</a> <a href="#">Kif1b</a> <a href="#">Lmna</a> <a href="#">Lrp2</a> <a href="#">Mep1b</a> <a href="#">Nr0b1</a> <a href="#">Pea15a</a> <a href="#">Plcd1</a> <a href="#">Plcd3</a> <a href="#">Plice1</a> <a href="#">Pten</a> <a href="#">Ptgs1</a> <a href="#">Rasgrp2</a> <a href="#">Rgs16</a> <a href="#">Rgs19</a> <a href="#">Serpine2</a> <a href="#">Slc27a2</a>                                                                                                                                                                                                                                                                                                                                                                                                                                                                                                                                                                                                                                                                                                                                                                                                                                                                                                                                                                                                                                                                                                                                                             |
| 10/196  | 0.031058 | <a href="#">GO:001632</a> apical plasma<br>membrane<br><a href="#">4</a>           | <a href="#">Abcb1b</a> <a href="#">Ank2</a> <a href="#">Anxa4</a> <a href="#">Atp1b2</a> <a href="#">Atp8b1</a> <a href="#">Car4</a> <a href="#">Erbb3</a> <a href="#">Lmo7</a> <a href="#">Lrp2</a> <a href="#">Tek</a>                                                                                                                                                                                                                                                                                                                                                                                                                                                                                                                                                                                                                                                                                                                                                                                                                                                                                                                                                                                                                                                                                                                                                                                                                                                                                                                                                                                                                                                                                                                                                                                                                                                                            |
| 26/669  | 0.032869 | <a href="#">GO:003198</a> vesicle<br><a href="#">2</a>                             | <a href="#">Abca1</a> <a href="#">Acpp</a> <a href="#">Ap1s2</a> <a href="#">Ap3b2</a> <a href="#">Ap3m2</a> <a href="#">Cltb</a> <a href="#">Crispld2</a> <a href="#">Dpysl3</a> <a href="#">Gabbr1</a> <a href="#">Homer2</a> <a href="#">Itga1</a> <a href="#">Kif1b</a> <a href="#">Kif3a</a> <a href="#">Kit</a> <a href="#">Lrp2</a> <a href="#">Pla2g1b</a> <a href="#">Rab6b</a> <a href="#">Rffl</a> <a href="#">Rgs19</a> <a href="#">Serpine2</a> <a href="#">Si</a> <a href="#">Slc30a2</a> <a href="#">Slc40a1</a> <a href="#">Spp1</a> <a href="#">Stmn2</a> <a href="#">Trh</a>                                                                                                                                                                                                                                                                                                                                                                                                                                                                                                                                                                                                                                                                                                                                                                                                                                                                                                                                                                                                                                                                                                                                                                                                                                                                                                      |
| 21/517  | 0.034167 | <a href="#">GO:003198</a> membrane-bounded<br>vesicle<br><a href="#">8</a>         | <a href="#">Abca1</a> <a href="#">Acpp</a> <a href="#">Crispld2</a> <a href="#">Dpysl3</a> <a href="#">Gabbr1</a> <a href="#">Homer2</a> <a href="#">Itga1</a> <a href="#">Kif1b</a> <a href="#">Kif3a</a> <a href="#">Kit</a> <a href="#">Lrp2</a> <a href="#">Pla2g1b</a> <a href="#">Rab6b</a> <a href="#">Rffl</a> <a href="#">Rgs19</a> <a href="#">Serpine2</a> <a href="#">Si</a> <a href="#">Slc30a2</a> <a href="#">Slc40a1</a> <a href="#">Spp1</a> <a href="#">Trh</a>                                                                                                                                                                                                                                                                                                                                                                                                                                                                                                                                                                                                                                                                                                                                                                                                                                                                                                                                                                                                                                                                                                                                                                                                                                                                                                                                                                                                                   |
| 5/79    | 0.048171 | <a href="#">GO:004444</a> cell cortex part<br><a href="#">8</a>                    | <a href="#">Actn2</a> <a href="#">Epb4.9</a> <a href="#">Myo1f</a> <a href="#">Sept4</a> <a href="#">Spnb3</a>                                                                                                                                                                                                                                                                                                                                                                                                                                                                                                                                                                                                                                                                                                                                                                                                                                                                                                                                                                                                                                                                                                                                                                                                                                                                                                                                                                                                                                                                                                                                                                                                                                                                                                                                                                                      |

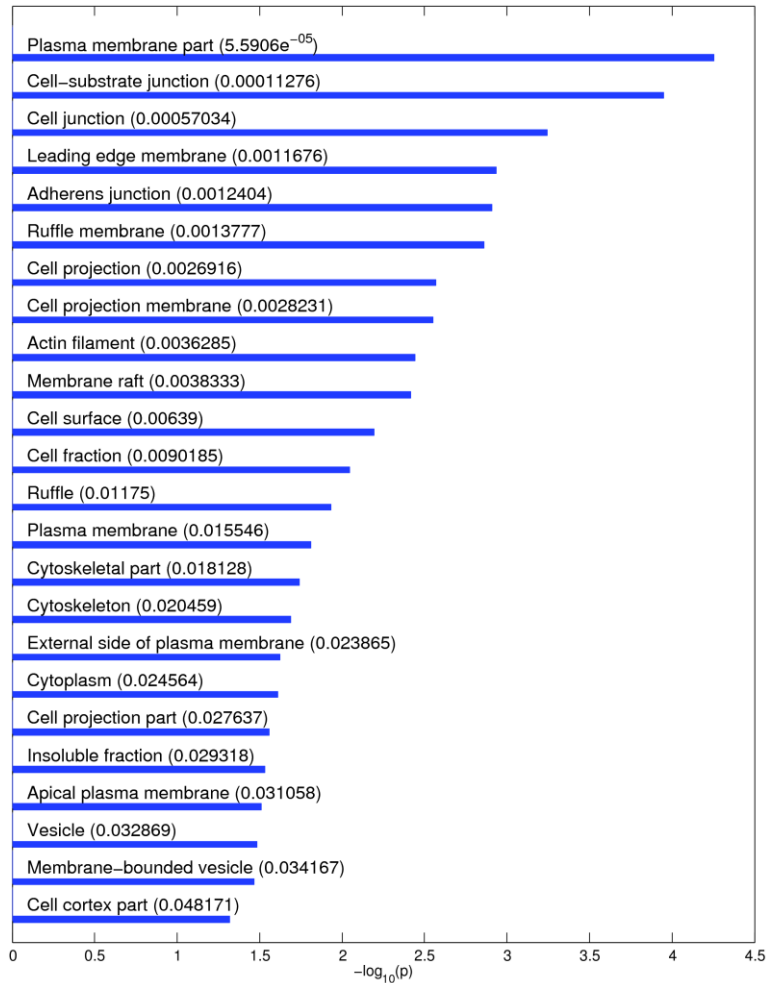

Figure 35: Plot bar of the  $-\log_{10}(p)$  of the significant enriched terms of Cellular-component-PGC KO-<->-PGC CTRL-Log2(2.8284). The longer the bar, the higher is the statistical significance of the enrichment (in parenthesis are written the p-values)

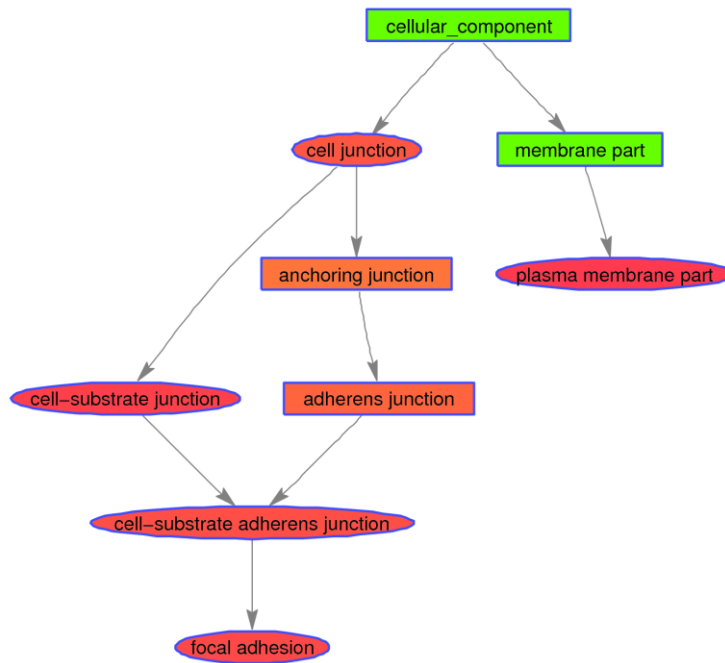

Figure 36: Direct acyclic graph (DAG) associated to the 5 top higher significant enriched gene ontology terms. The higher the significance of the term the more red is the box framing the term. The significant enriched terms are encircled by ellipses.
